# Supplementary material for: Chemical Constituents from Cimicifuga dahurica and Their Anti-Proliferative Effects on MCF-7 Breast Cancer Cells
Source: MDPI journal article supplement (doi:10.3390/molecules23051083), 2018-05-04

# CB7-MeOD-COSYGP

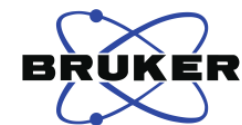

Current Data Parameters  
 NAME 11D\_CB7  
 EXPNO 7  
 PROCNO 1

F2 - Acquisition Parameters  
 Date\_ 20170703  
 Time 5.47  
 INSTRUM spect  
 PROBHD 5 mm PABBO BB/  
 PULPROG cosygpppqf  
 TD 2048  
 SOLVENT MeOD  
 NS 2  
 DS 8  
 SWH 3496.503 Hz  
 FIDRES 1.707277 Hz  
 AQ 0.2928640 sec  
 RG 14.29  
 DW 143.000 usec  
 DE 6.50 usec  
 TE 303.0 K  
 D0 0.00000300 sec  
 D1 1.86032605 sec  
 D11 0.03000000 sec  
 D12 0.00002000 sec  
 D13 0.00000400 sec  
 D16 0.00020000 sec  
 IN0 0.00028600 sec

===== CHANNEL f1 =====  
 SFO1 500.2024863 MHz  
 NUC1 1H  
 P0 10.00 usec  
 P1 10.00 usec  
 P17 2500.00 usec  
 PLW1 22.00000000 W  
 PLW10 3.25440001 W

===== GRADIENT CHANNEL =====  
 GPNAM[1] SMSQ10.100  
 GPZ1 10.00 %  
 P16 1000.00 usec

F1 - Acquisition parameters  
 TD 128  
 SFO1 500.2025 MHz  
 FIDRES 27.316433 Hz  
 SW 6.990 ppm  
 FhMODE QF

F2 - Processing parameters  
 SI 1024  
 SF 500.2000000 MHz  
 WDW QSINE  
 SSB 0  
 LB 0 Hz  
 GB 0  
 PC 1.40

F1 - Processing parameters  
 SI 1024  
 MC2 QF  
 SF 500.2000000 MHz  
 WDW QSINE  
 SSB 0  
 LB 0 Hz  
 GB 0

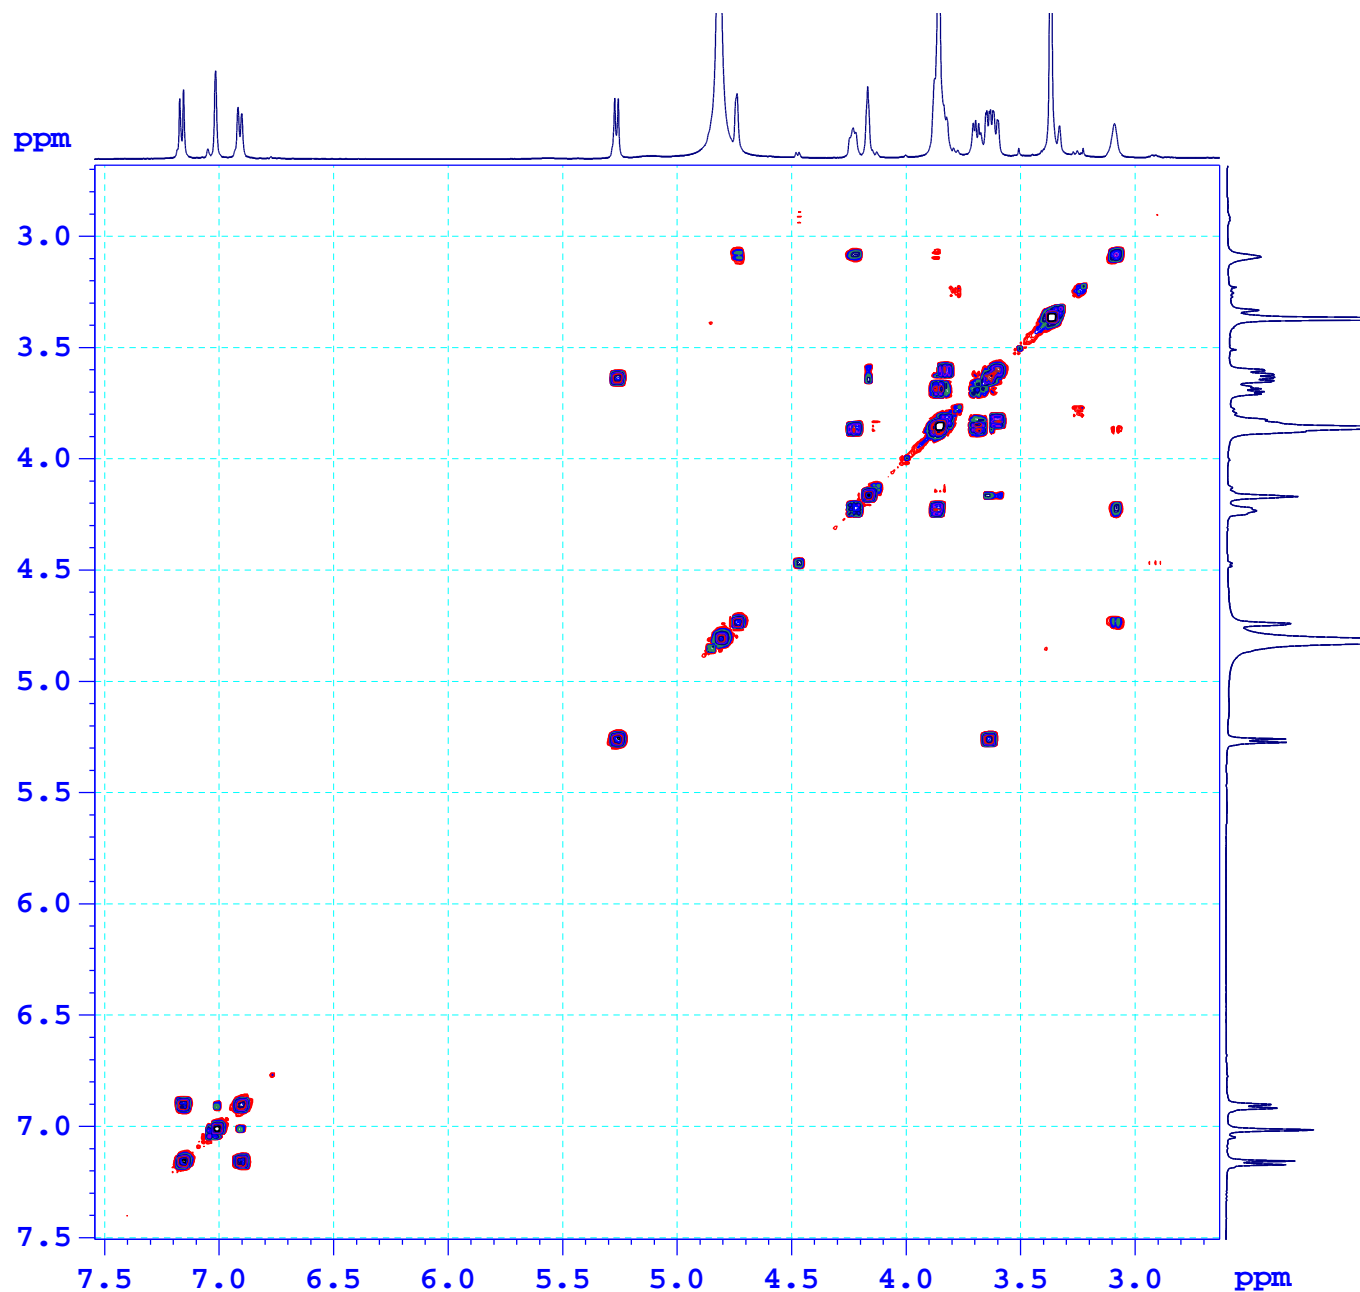

# CB7-MeOD-COSYGP



Current Data Parameters  
 NAME 11D\_CB7  
 EXPNO 7  
 PROCNO 1

F2 - Acquisition Parameters  
 Date\_ 20170703  
 Time 5.47  
 INSTRUM spect  
 PROBHD 5 mm PABBO BB/  
 PULPROG cosygpppqf  
 TD 2048  
 SOLVENT MeOD  
 NS 2  
 DS 8  
 SWH 3496.503 Hz  
 FIDRES 1.707277 Hz  
 AQ 0.2928640 sec  
 RG 14.29  
 DW 143.000 usec  
 DE 6.50 usec  
 TE 303.0 K  
 D0 0.00000300 sec  
 D1 1.86032605 sec  
 D11 0.03000000 sec  
 D12 0.00002000 sec  
 D13 0.00000400 sec  
 D16 0.00020000 sec  
 INO 0.00028600 sec

===== CHANNEL f1 =====  
 SF01 500.2024863 MHz  
 NUC1 1H  
 P0 10.00 usec  
 P1 10.00 usec  
 P17 2500.00 usec  
 PLW1 22.00000000 W  
 PLW10 3.25440001 W

===== GRADIENT CHANNEL =====  
 GPNAM[1] SMSQ10.100  
 GPZ1 10.00 %  
 P16 1000.00 usec

F1 - Acquisition parameters  
 TD 128  
 SF01 500.2025 MHz  
 FIDRES 27.316433 Hz  
 SW 6.990 ppm  
 FMODE QF

F2 - Processing parameters  
 SI 1024  
 SF 500.2000000 MHz  
 WDW QSINE  
 SSB 0  
 LB 0 Hz  
 GB 0  
 PC 1.40

F1 - Processing parameters  
 SI 1024  
 MC2 QF  
 SF 500.2000000 MHz  
 WDW QSINE  
 SSB 0  
 LB 0 Hz  
 GB 0

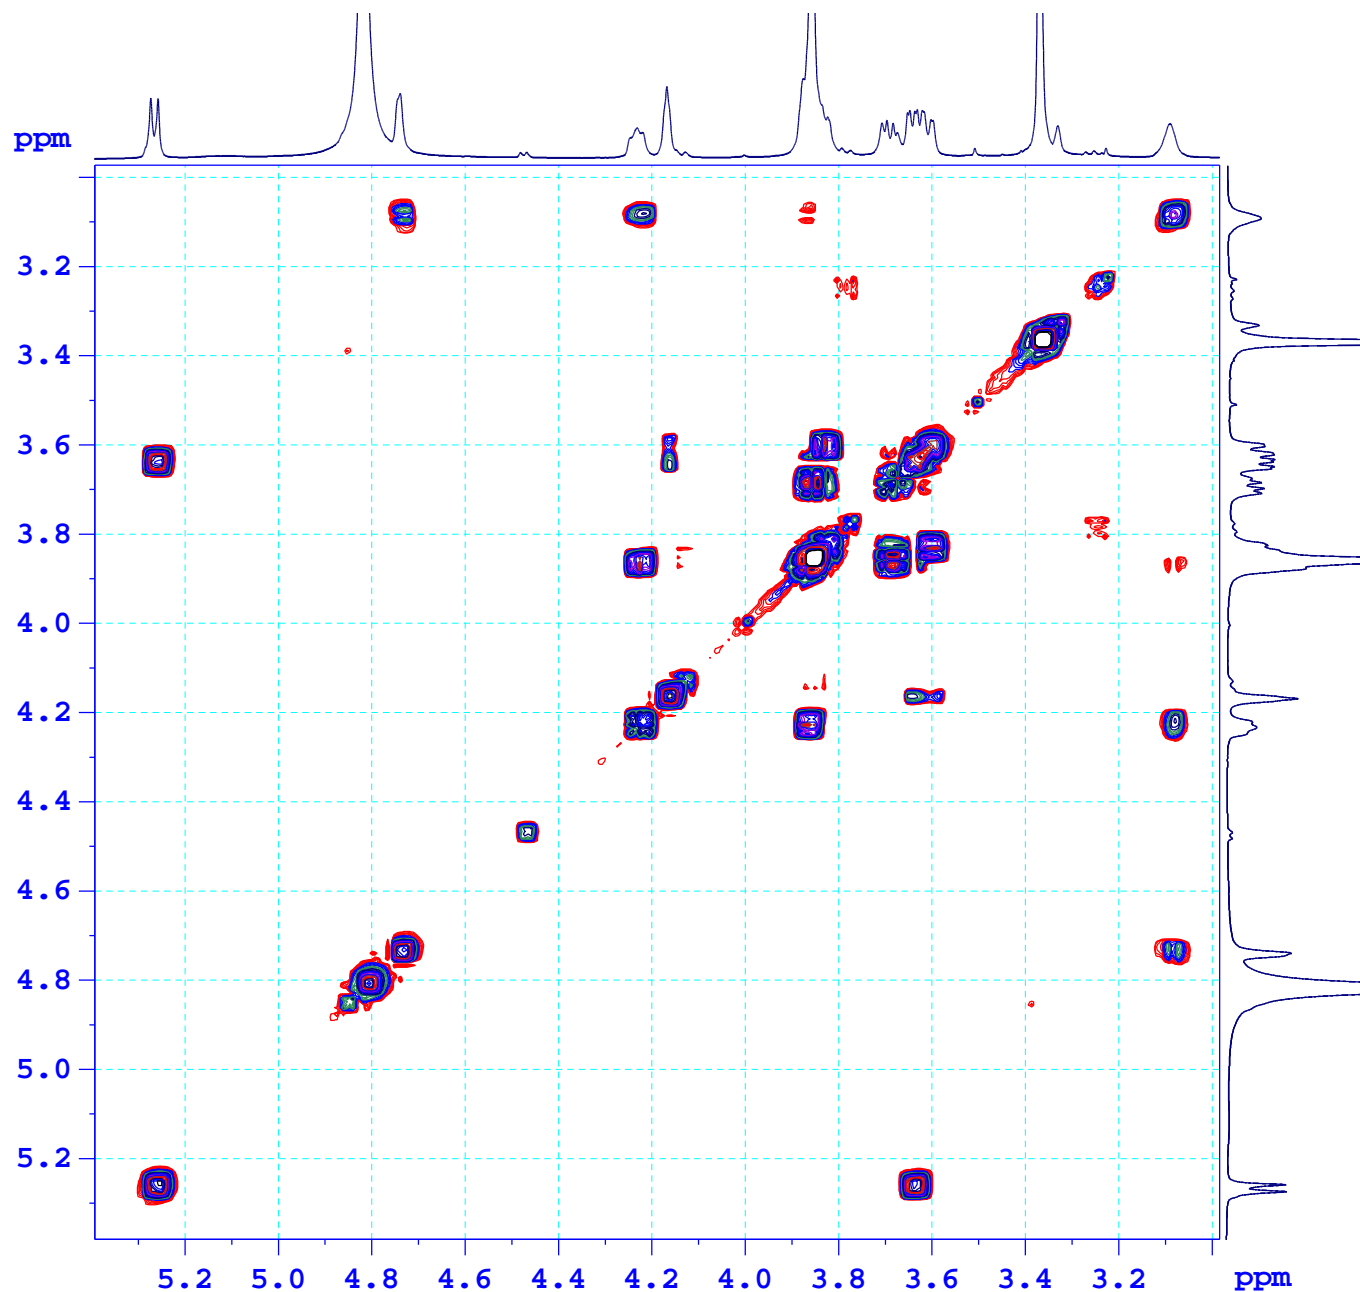

# CB7-MeOD-COSYGP

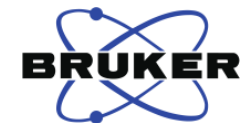

Current Data Parameters  
NAME 11D\_CB7  
EXPNO 7  
PROCNO 1

F2 - Acquisition Parameters  
Date\_ 20170703  
Time 5.47  
INSTRUM spect  
PROBHD 5 mm PABBO BB/  
PULPROG cosygpppqf  
TD 2048  
SOLVENT MeOD  
NS 2  
DS 8  
SWH 3496.503 Hz  
FIDRES 1.707277 Hz  
AQ 0.2928640 sec  
RG 14.29  
DW 143.000 usec  
DE 6.50 usec  
TE 303.0 K  
D0 0.00000300 sec  
D1 1.86032605 sec  
D11 0.03000000 sec  
D12 0.00002000 sec  
D13 0.00000400 sec  
D16 0.00020000 sec  
INO 0.00028600 sec

===== CHANNEL f1 =====  
SF01 500.2024863 MHz  
NUC1 1H  
P0 10.00 usec  
P1 10.00 usec  
P17 2500.00 usec  
PLW1 22.00000000 W  
PLW10 3.25440001 W

===== GRADIENT CHANNEL =====  
GPNAM[1] SMSQ10.100  
GPZ1 10.00 %  
P16 1000.00 usec

F1 - Acquisition parameters  
TD 128  
SF01 500.2025 MHz  
FIDRES 27.316433 Hz  
SW 6.990 ppm  
FnMODE QF

F2 - Processing parameters  
SI 1024  
SF 500.2000000 MHz  
WDW QSINE  
SSB 0  
LB 0 Hz  
GB 0  
PC 1.40

F1 - Processing parameters  
SI 1024  
MC2 QF  
SF 500.2000000 MHz  
WDW QSINE  
SSB 0  
LB 0 Hz  
GB 0

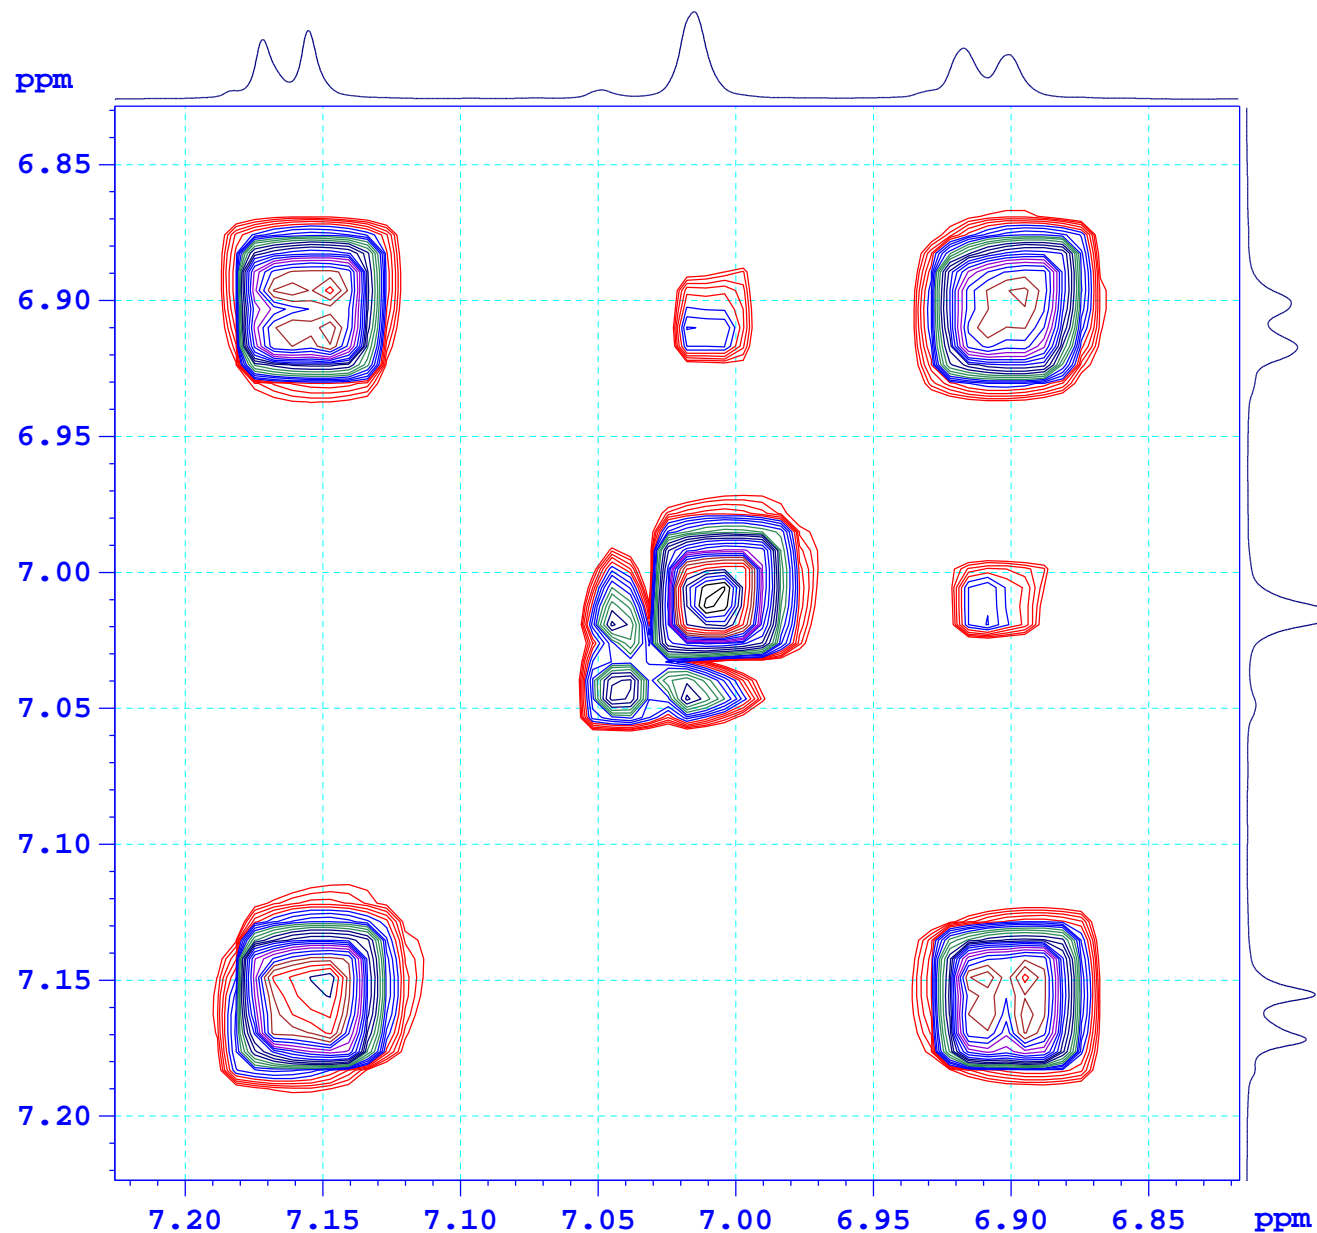

Supplement: s1 [file s1]
