# Supplementary material for: Chemical Constituents from Cimicifuga dahurica and Their Anti-Proliferative Effects on MCF-7 Breast Cancer Cells
Source: MDPI journal article supplement (doi:10.3390/molecules23051083), 2018-05-04

# CB6-MeOD-ROESY

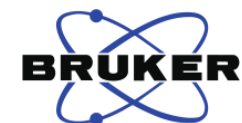

Current Data Parameters  
 NAME 11D\_CB6  
 EXPNO 8  
 PROCNO 1

F2 - Acquisition Parameters  
 Date\_ 20170616  
 Time 20.43  
 INSTRUM spect  
 PROBHD 5 mm PABBO BB/  
 PULPROG roesyphpp.2  
 TD 2048  
 SOLVENT MeOD  
 NS 4  
 DS 32  
 SWH 2777.778 Hz  
 FIDRES 1.356337 Hz  
 AQ 0.3686400 sec  
 RG 17.93  
 DW 180.000 usec  
 DE 6.50 usec  
 TE 303.0 K  
 D0 0.00016963 sec  
 D1 1.83615994 sec  
 D11 0.03000000 sec  
 D12 0.00002000 sec  
 IN0 0.00036000 sec  
 L4 1000  
 P15 200000.00 usec

===== CHANNEL f1 =====  
 SFO1 500.2013822 MHz  
 NUC1 1H  
 P1 10.00 usec  
 P17 2500.00 usec  
 P25 100.00 usec  
 PLW1 22.00000000 W  
 PLW10 3.25440001 W  
 PLW27 0.88000000 W

F1 - Acquisition parameters  
 TD 256  
 SFO1 500.2014 MHz  
 FIDRES 10.850695 Hz  
 SW 5.553 ppm  
 FMODE States-TPPI

F2 - Processing parameters  
 SI 1024  
 SF 500.2000000 MHz  
 WDW QSINE  
 SSB 2  
 LB 0 Hz  
 GB 0  
 PC 1.00

F1 - Processing parameters  
 SI 1024  
 MC2 States-TPPI  
 SF 500.2000000 MHz  
 WDW QSINE  
 SSB 2  
 LB 0 Hz  
 GB 0

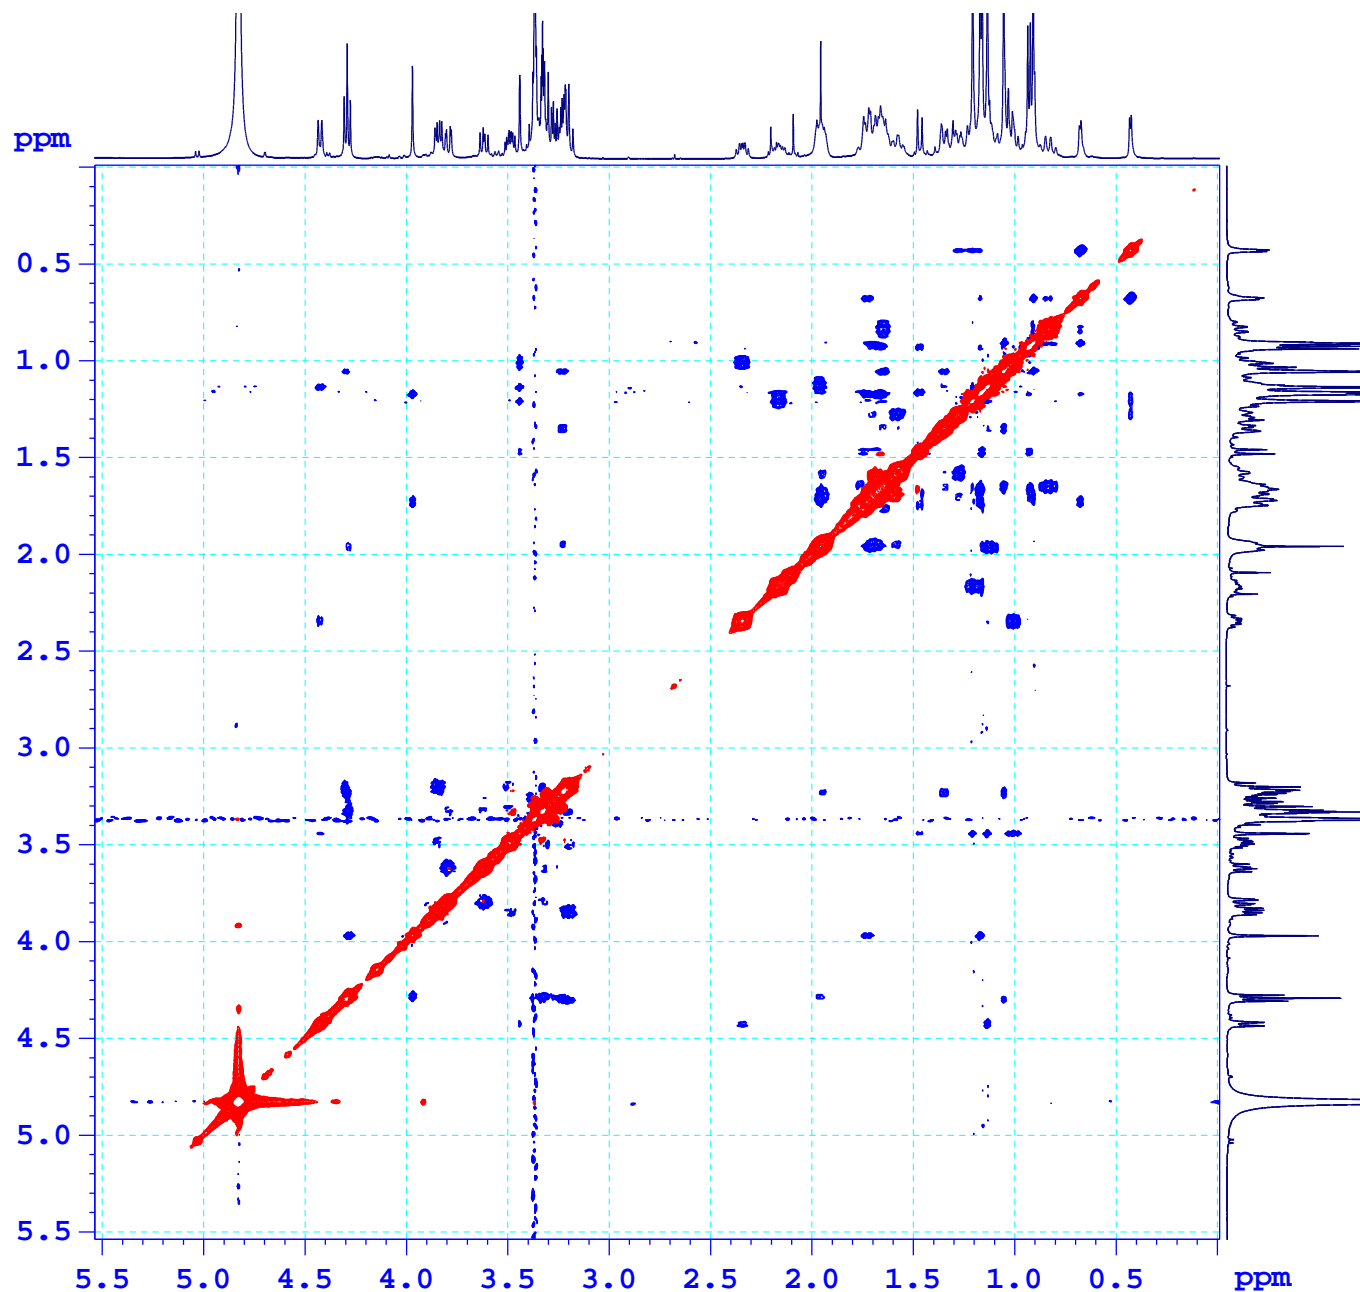

# CB6-MeOD-ROESY

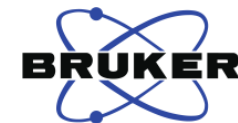

Current Data Parameters  
 NAME 11D\_CB6  
 EXPNO 8  
 PROCNO 1

F2 - Acquisition Parameters  
 Date\_ 20170616  
 Time 20.43  
 INSTRUM spect  
 PROBHD 5 mm PABBO BB/  
 PULPROG roesyphpp.2  
 TD 2048  
 SOLVENT MeOD  
 NS 4  
 DS 32  
 SWH 2777.778 Hz  
 FIDRES 1.356337 Hz  
 AQ 0.3686400 sec  
 RG 17.93  
 DW 180.000 usec  
 DE 6.50 usec  
 TE 303.0 K  
 D0 0.00016963 sec  
 D1 1.83615994 sec  
 D11 0.03000000 sec  
 D12 0.00002000 sec  
 IN0 0.00036000 sec  
 L4 1000  
 P15 200000.00 usec

===== CHANNEL f1 =====  
 SFO1 500.2013822 MHz  
 NUC1 1H  
 P1 10.00 usec  
 P17 2500.00 usec  
 P25 100.00 usec  
 PLW1 22.00000000 W  
 PLW10 3.25440001 W  
 PLW27 0.88000000 W

F1 - Acquisition parameters  
 TD 256  
 SFO1 500.2014 MHz  
 FIDRES 10.850695 Hz  
 SW 5.553 ppm  
 FMODE States-TPPI

F2 - Processing parameters  
 SI 1024  
 SF 500.2000000 MHz  
 WDW QSINE  
 SSB 2  
 LB 0 Hz  
 GB 0  
 PC 1.00

F1 - Processing parameters  
 SI 1024  
 MC2 States-TPPI  
 SF 500.2000000 MHz  
 WDW QSINE  
 SSB 2  
 LB 0 Hz  
 GB 0

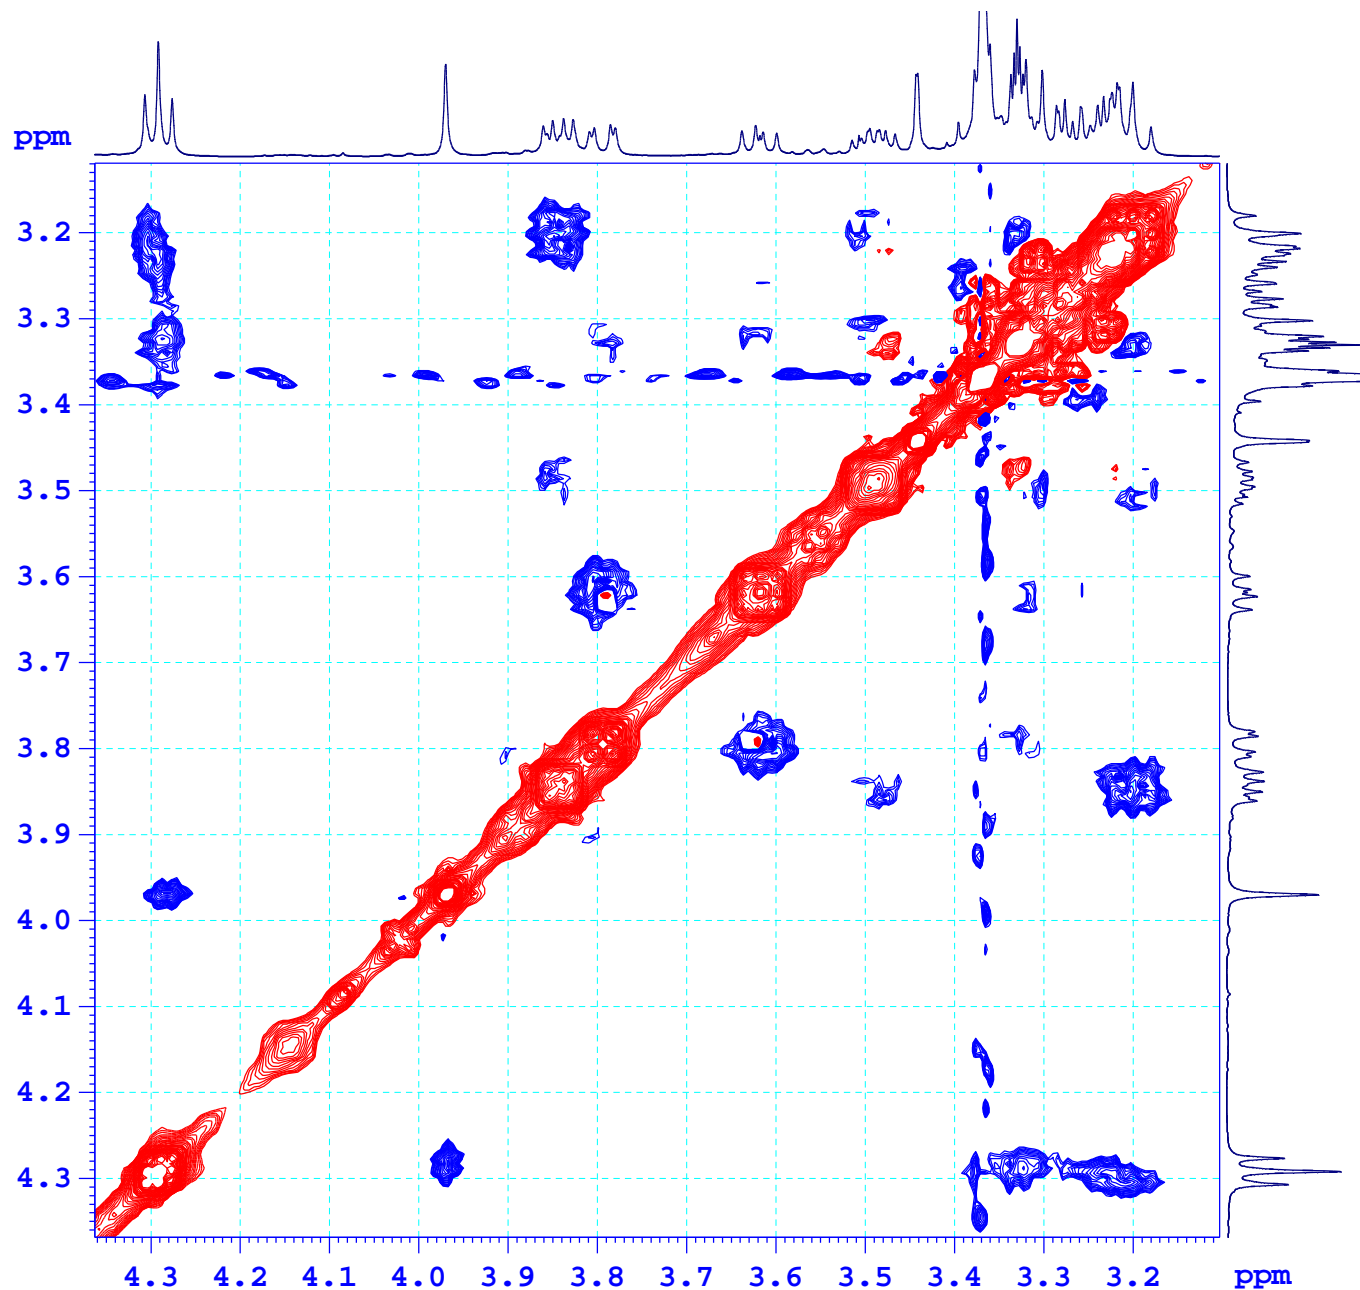

# CB6-MeOD-ROESY

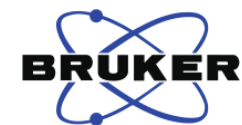

Current Data Parameters  
 NAME 11D\_CB6  
 EXPNO 8  
 PROCNO 1

F2 - Acquisition Parameters  
 Date\_ 20170616  
 Time 20.43  
 INSTRUM spect  
 PROBHD 5 mm PABBO BB/  
 PULPROG roesyphpp.2  
 TD 2048  
 SOLVENT MeOD  
 NS 4  
 DS 32  
 SWH 2777.778 Hz  
 FIDRES 1.356337 Hz  
 AQ 0.3686400 sec  
 RG 17.93  
 DW 180.000 usec  
 DE 6.50 usec  
 TE 303.0 K  
 D0 0.00016963 sec  
 D1 1.83615994 sec  
 D11 0.03000000 sec  
 D12 0.00002000 sec  
 IN0 0.00036000 sec  
 L4 1000  
 P15 200000.00 usec

===== CHANNEL f1 =====  
 SFO1 500.2013822 MHz  
 NUC1 1H  
 P1 10.00 usec  
 P17 2500.00 usec  
 P25 100.00 usec  
 PLW1 22.00000000 W  
 PLW10 3.25440001 W  
 PLW27 0.88000000 W

F1 - Acquisition parameters  
 TD 256  
 SFO1 500.2014 MHz  
 FIDRES 10.850695 Hz  
 SW 5.553 ppm  
 FnmODE States-TPPI

F2 - Processing parameters  
 SI 1024  
 SF 500.2000000 MHz  
 WDW QSINE  
 SSB 2  
 LB 0 Hz  
 GB 0  
 PC 1.00

F1 - Processing parameters  
 SI 1024  
 MC2 States-TPPI  
 SF 500.2000000 MHz  
 WDW QSINE  
 SSB 2  
 LB 0 Hz  
 GB 0

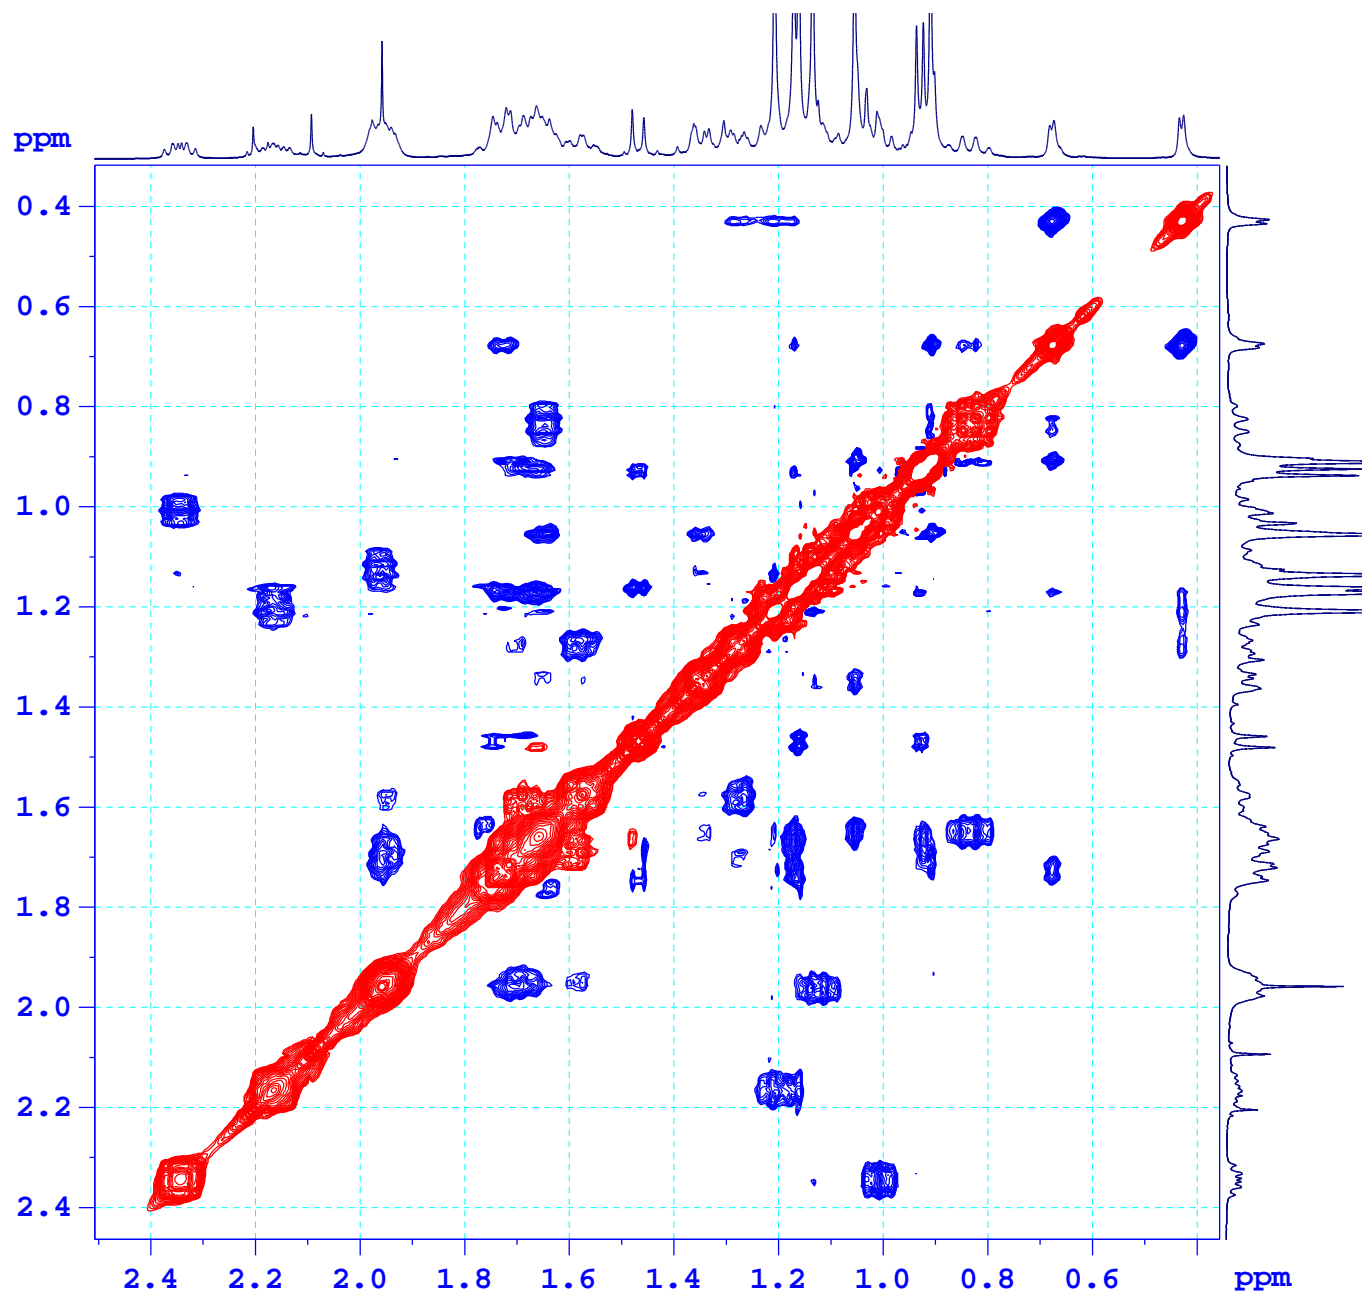

# CB6-MeOD-ROESY



Current Data Parameters  
 NAME 11D\_CB6  
 EXPNO 8  
 PROCNO 1

F2 - Acquisition Parameters  
 Date\_ 20170616  
 Time 20.43  
 INSTRUM spect  
 PROBHD 5 mm PABBO BB/  
 PULPROG roesyphpp.2  
 TD 2048  
 SOLVENT MeOD  
 NS 4  
 DS 32  
 SWH 2777.778 Hz  
 FIDRES 1.356337 Hz  
 AQ 0.3686400 sec  
 RG 17.93  
 DW 180.000 usec  
 DE 6.50 usec  
 TE 303.0 K  
 D0 0.00016963 sec  
 D1 1.83615994 sec  
 D11 0.03000000 sec  
 D12 0.00002000 sec  
 IN0 0.00036000 sec  
 L4 1000  
 P15 200000.00 usec

===== CHANNEL f1 =====  
 SFO1 500.2013822 MHz  
 NUC1 1H  
 P1 10.00 usec  
 P17 2500.00 usec  
 P25 100.00 usec  
 PLW1 22.00000000 W  
 PLW10 3.25440001 W  
 PLW27 0.88000000 W

F1 - Acquisition parameters  
 TD 256  
 SFO1 500.2014 MHz  
 FIDRES 10.850695 Hz  
 SW 5.553 ppm  
 F1MODE States-TPPI

F2 - Processing parameters  
 SI 1024  
 SF 500.2000000 MHz  
 WDW QSINE  
 SSB 2  
 LB 0 Hz  
 GB 0  
 PC 1.00

F1 - Processing parameters  
 SI 1024  
 MC2 States-TPPI  
 SF 500.2000000 MHz  
 WDW QSINE  
 SSB 2  
 LB 0 Hz  
 GB 0

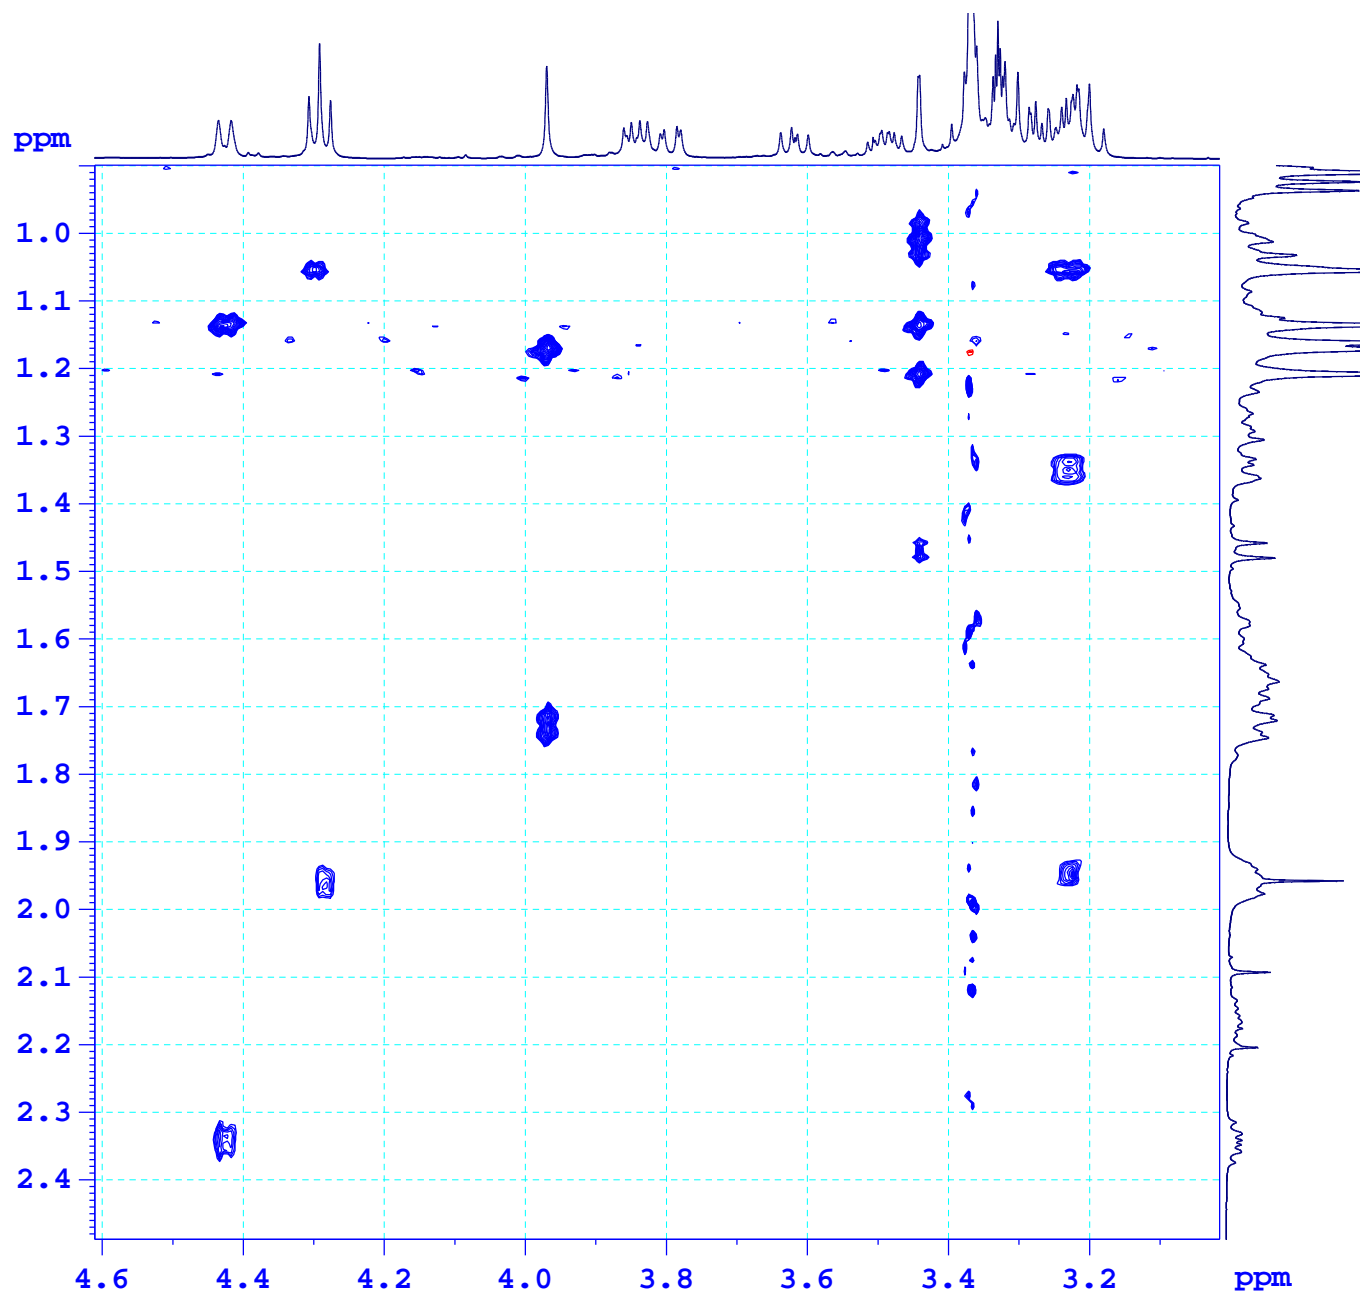

Supplement: s1 [file s1]
