# Supplementary material for: Chemical Constituents from Cimicifuga dahurica and Their Anti-Proliferative Effects on MCF-7 Breast Cancer Cells
Source: MDPI journal article supplement (doi:10.3390/molecules23051083), 2018-05-04
Supplement: s1 [file s1]

# CB7-MeOD-ROESY

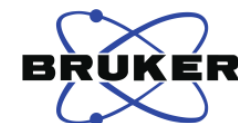

Current Data Parameters  
 NAME 11D\_CB7  
 EXPNO 8  
 PROCNO 1

F2 - Acquisition Parameters  
 Date\_ 20170703  
 Time 5.59  
 INSTRUM spect  
 PROBHD 5 mm PABBO BB/  
 PULPROG roesyphpp.2  
 TD 2048  
 SOLVENT MeOD  
 NS 4  
 DS 32  
 SWH 3521.127 Hz  
 FIDRES 1.719300 Hz  
 AQ 0.2908160 sec  
 RG 14.29  
 DW 142.000 usec  
 DE 6.50 usec  
 TE 303.0 K  
 D0 0.00013163 sec  
 D1 1.91398394 sec  
 D11 0.03000000 sec  
 D12 0.00002000 sec  
 IN0 0.00028400 sec  
 L4 1000  
 P15 200000.00 usec

===== CHANNEL f1 =====  
 SFO1 500.2024895 MHz  
 NUC1 1H  
 P1 10.00 usec  
 P17 2500.00 usec  
 P25 100.00 usec  
 PLW1 22.00000000 W  
 PLW10 3.25440001 W  
 PLW27 0.88000000 W

F1 - Acquisition parameters  
 TD 256  
 SFO1 500.2025 MHz  
 FIDRES 13.754401 Hz  
 SW 7.039 ppm  
 FnMODE States-TPPI

F2 - Processing parameters  
 SI 1024  
 SF 500.2000038 MHz  
 WDW QSINE  
 SSB 2  
 LB 0 Hz  
 GB 0  
 PC 1.00

F1 - Processing parameters  
 SI 1024  
 MC2 States-TPPI  
 SF 500.2000042 MHz  
 WDW QSINE  
 SSB 2  
 LB 0 Hz  
 GB 0

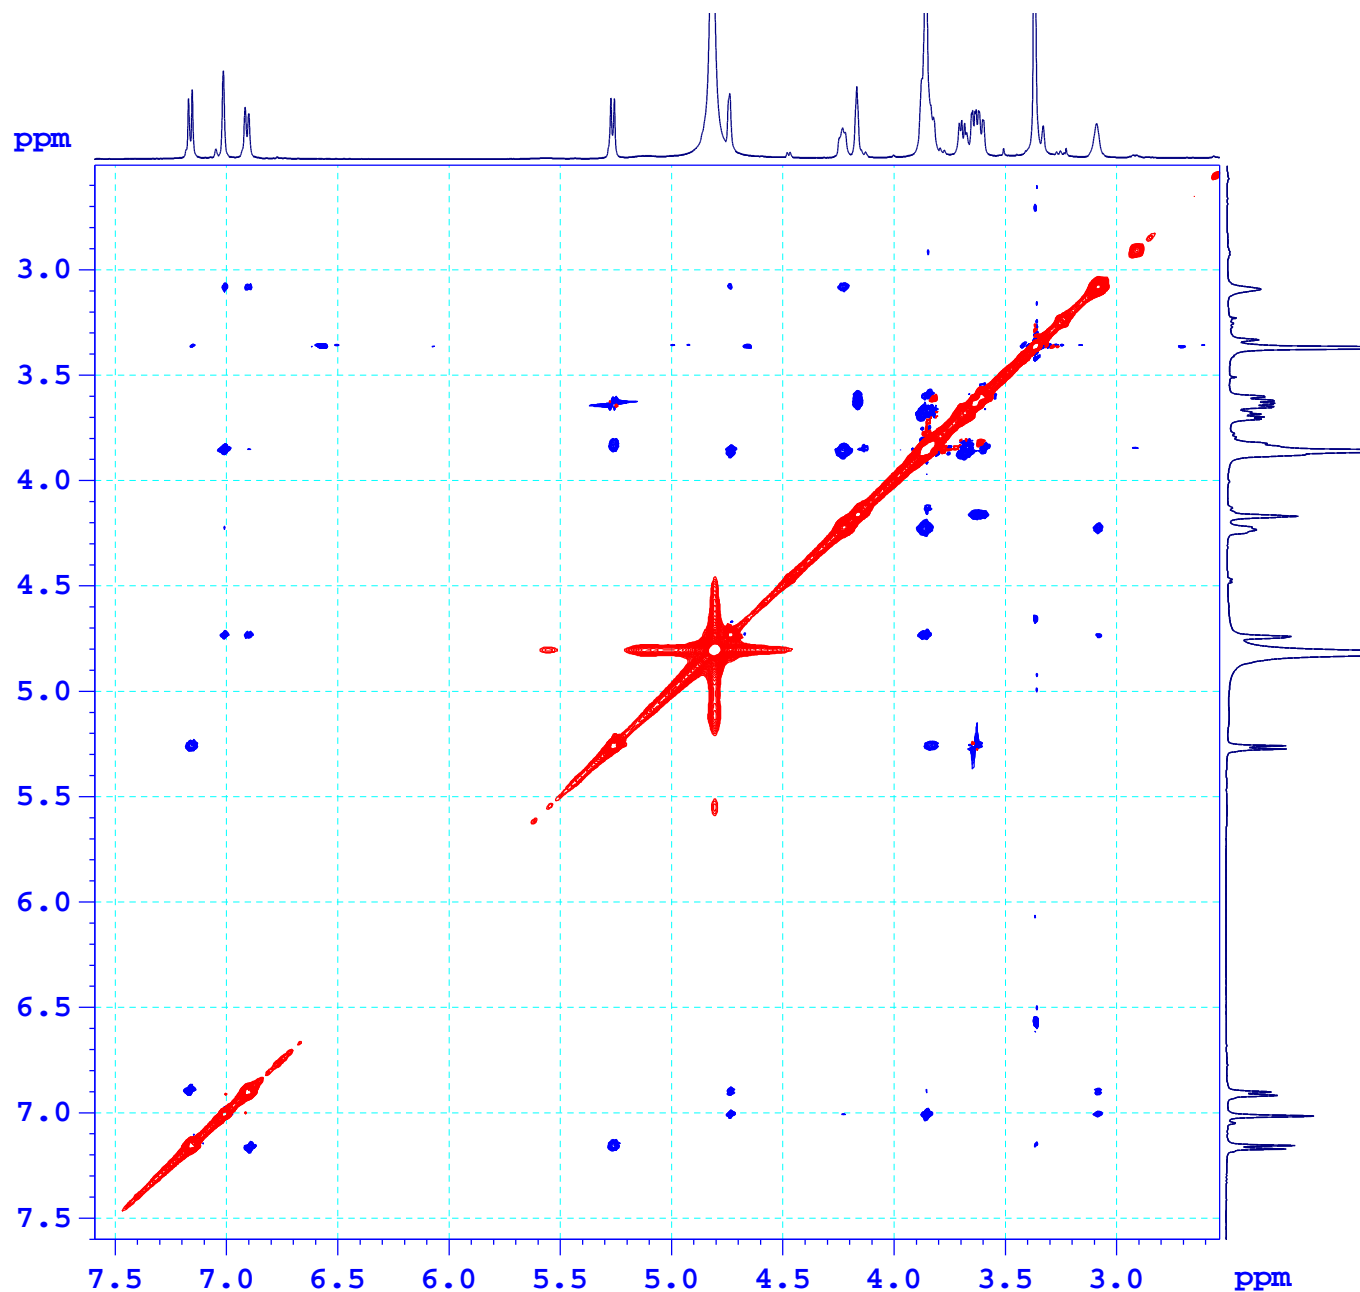

# CB7-MeOD-ROESY



Current Data Parameters  
 NAME 11D\_CB7  
 EXPNO 8  
 PROCNO 1

F2 - Acquisition Parameters  
 Date\_ 20170703  
 Time 5.59  
 INSTRUM spect  
 PROBHD 5 mm PABBO BB/  
 PULPROG roesyphpp.2  
 TD 2048  
 SOLVENT MeOD  
 NS 4  
 DS 32  
 SWH 3521.127 Hz  
 FIDRES 1.719300 Hz  
 AQ 0.2908160 sec  
 RG 14.29  
 DW 142.000 usec  
 DE 6.50 usec  
 TE 303.0 K  
 D0 0.00013163 sec  
 D1 1.91398394 sec  
 D11 0.03000000 sec  
 D12 0.00002000 sec  
 IN0 0.00028400 sec  
 L4 1000  
 P15 200000.00 usec

===== CHANNEL f1 =====  
 SFO1 500.2024895 MHz  
 NUC1 1H  
 P1 10.00 usec  
 P17 2500.00 usec  
 P25 100.00 usec  
 PLW1 22.00000000 W  
 PLW10 3.25440001 W  
 PLW27 0.88000000 W

F1 - Acquisition parameters  
 TD 256  
 SFO1 500.2025 MHz  
 FIDRES 13.754401 Hz  
 SW 7.039 ppm  
 FnMODE States-TPPI

F2 - Processing parameters  
 SI 1024  
 SF 500.2000038 MHz  
 WDW QSINE  
 SSB 2  
 LB 0 Hz  
 GB 0  
 PC 1.00

F1 - Processing parameters  
 SI 1024  
 MC2 States-TPPI  
 SF 500.2000042 MHz  
 WDW QSINE  
 SSB 2  
 LB 0 Hz  
 GB 0

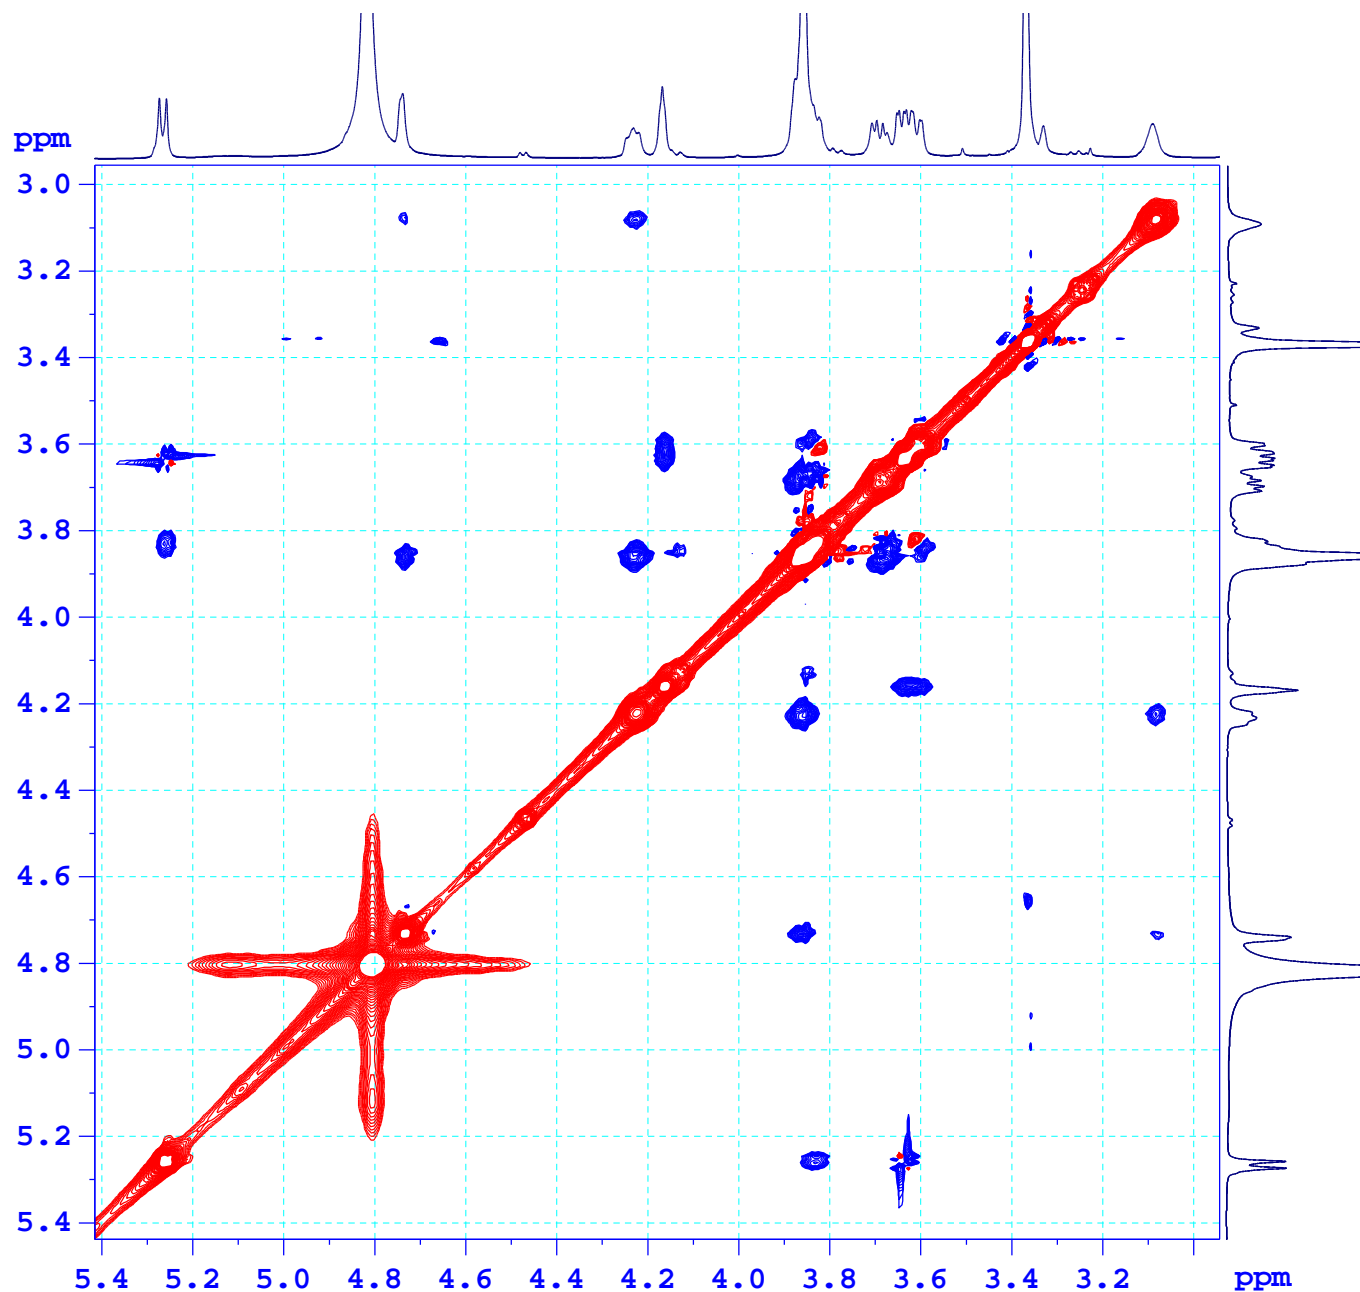

# CB7-MeOD-ROESY

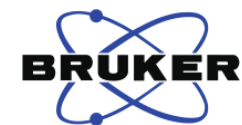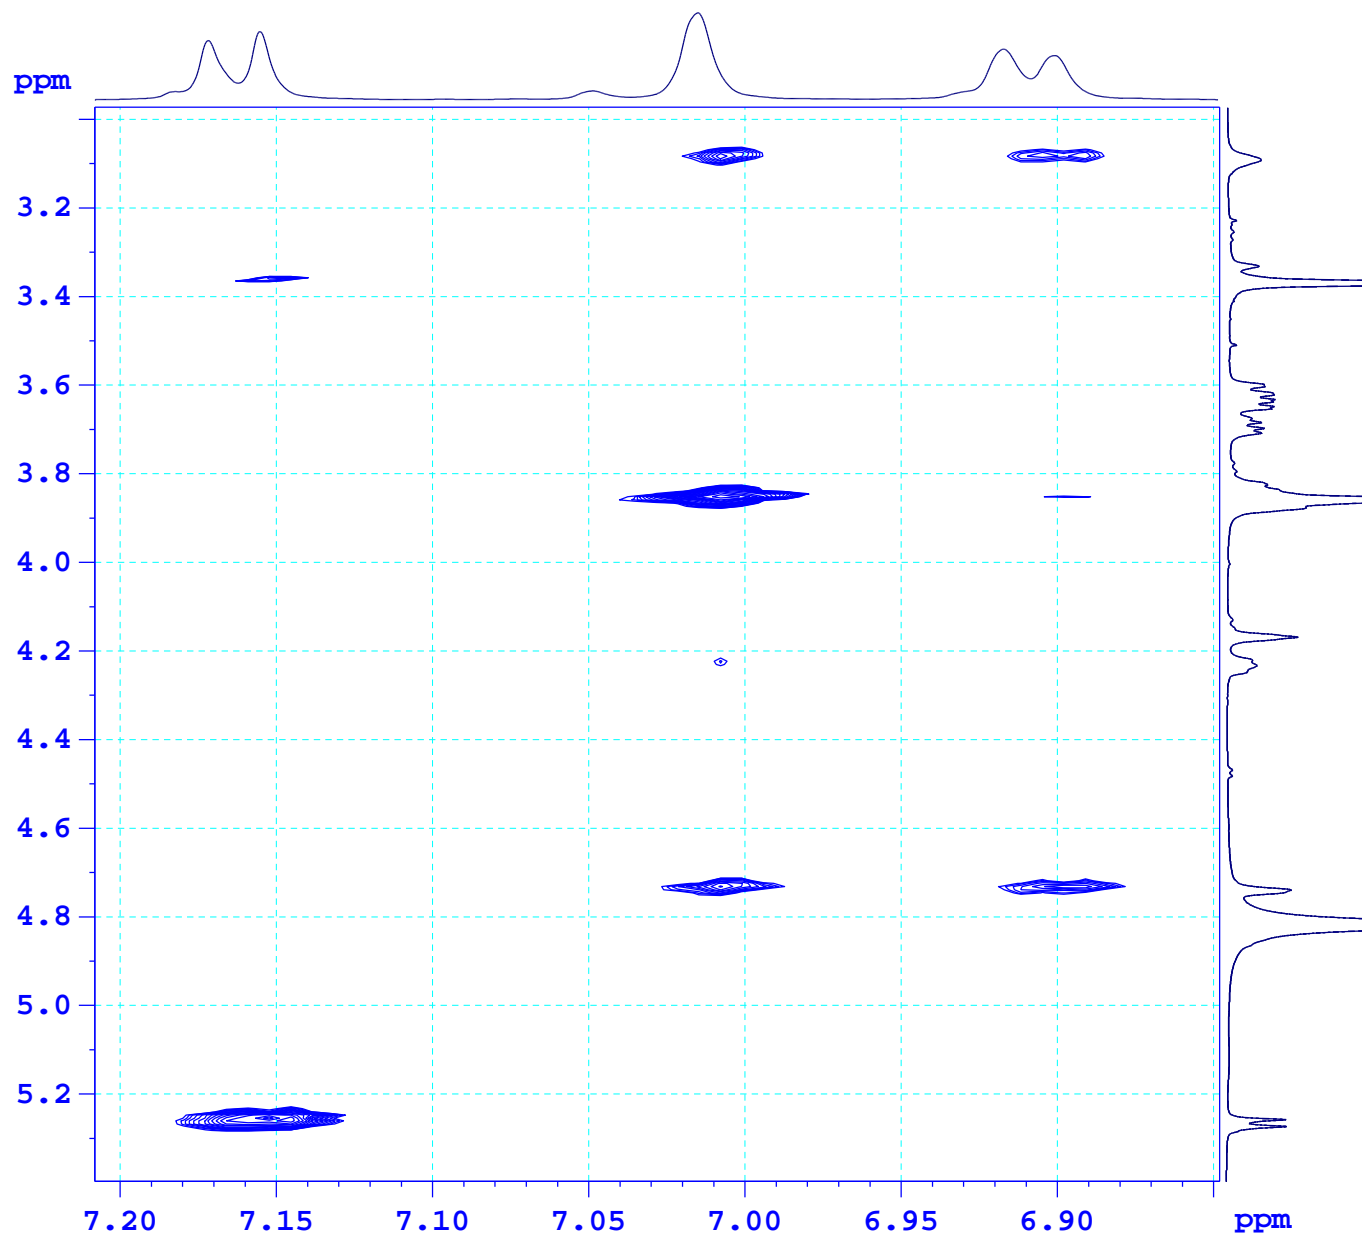

Current Data Parameters  
NAME 11D\_CB7  
EXPNO 8  
PROCNO 1

F2 - Acquisition Parameters  
Date\_ 20170703  
Time 5.59  
INSTRUM spect  
PROBHD 5 mm PABBO BB/  
PULPROG roesyphpp.2  
TD 2048  
SOLVENT MeOD  
NS 4  
DS 32  
SWH 3521.127 Hz  
FIDRES 1.719300 Hz  
AQ 0.2908160 sec  
RG 14.29  
DW 142.000 usec  
DE 6.50 usec  
TE 303.0 K  
D0 0.00013163 sec  
D1 1.91398394 sec  
D11 0.03000000 sec  
D12 0.00002000 sec  
IN0 0.00028400 sec  
L4 1000  
P15 200000.00 usec

===== CHANNEL f1 =====  
SFO1 500.2024895 MHz  
NUC1 1H  
P1 10.00 usec  
P17 2500.00 usec  
P25 100.00 usec  
PLW1 22.00000000 W  
PLW10 3.25440001 W  
PLW27 0.88000000 W

F1 - Acquisition parameters  
TD 256  
SFO1 500.2025 MHz  
FIDRES 13.754401 Hz  
SW 7.039 ppm  
FnMODE States-TPPI

F2 - Processing parameters  
SI 1024  
SF 500.2000038 MHz  
WDW QSINE  
SSB 2  
LB 0 Hz  
GB 0  
PC 1.00

F1 - Processing parameters  
SI 1024  
MC2 States-TPPI  
SF 500.2000042 MHz  
WDW QSINE  
SSB 2  
LB 0 Hz  
GB 0
