# Supplementary material for: Chemical Constituents from Cimicifuga dahurica and Their Anti-Proliferative Effects on MCF-7 Breast Cancer Cells
Source: MDPI journal article supplement (doi:10.3390/molecules23051083), 2018-05-04

# CB3-MeOD-1H

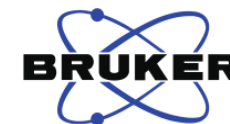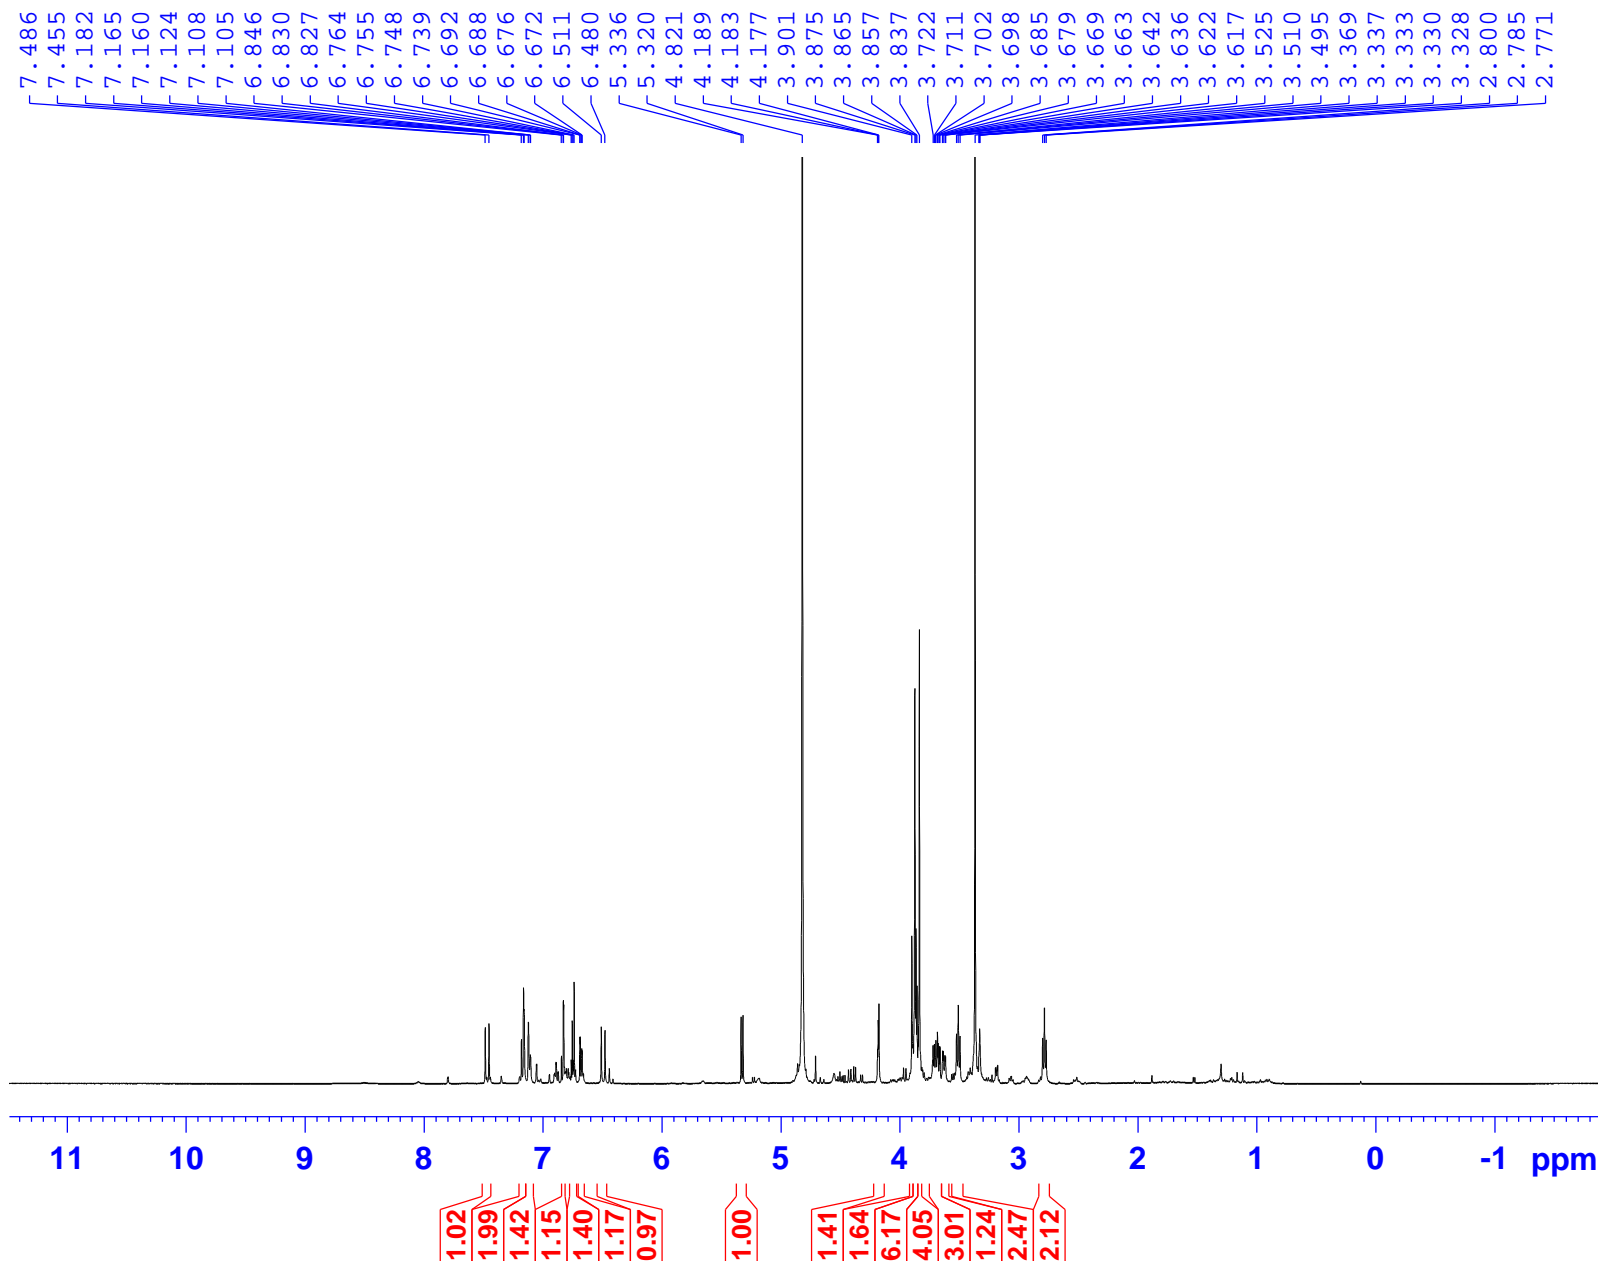

## Current Data Parameters

NAME 11D\_CB3  
EXPNO 1  
PROCNO 1

## F2 - Acquisition Parameters

Date\_ 20170601  
Time 16.13  
INSTRUM spect  
PROBHD 5 mm PABBO BB/  
PULPROG zg30  
TD 65536  
SOLVENT MeOD  
NS 16  
DS 2  
SWH 10000.000 Hz  
FIDRES 0.152588 Hz  
AQ 3.2767999 sec  
RG 30.85  
DW 50.000 usec  
DE 6.50 usec  
TE 303.0 K  
D1 1.00000000 sec  
TD0 1

## ==== CHANNEL f1 =====

SFO1 500.2030889 MHz  
NUC1 1H  
P1 10.00 usec  
PLW1 22.00000000 W

## F2 - Processing parameters

SI 65536  
SF 500.2000002 MHz  
WDW EM  
SSB 0  
LB 0.30 Hz  
GB 0  
PC 1.00

CB3-MeOD-1H

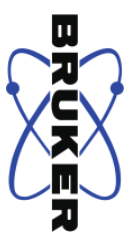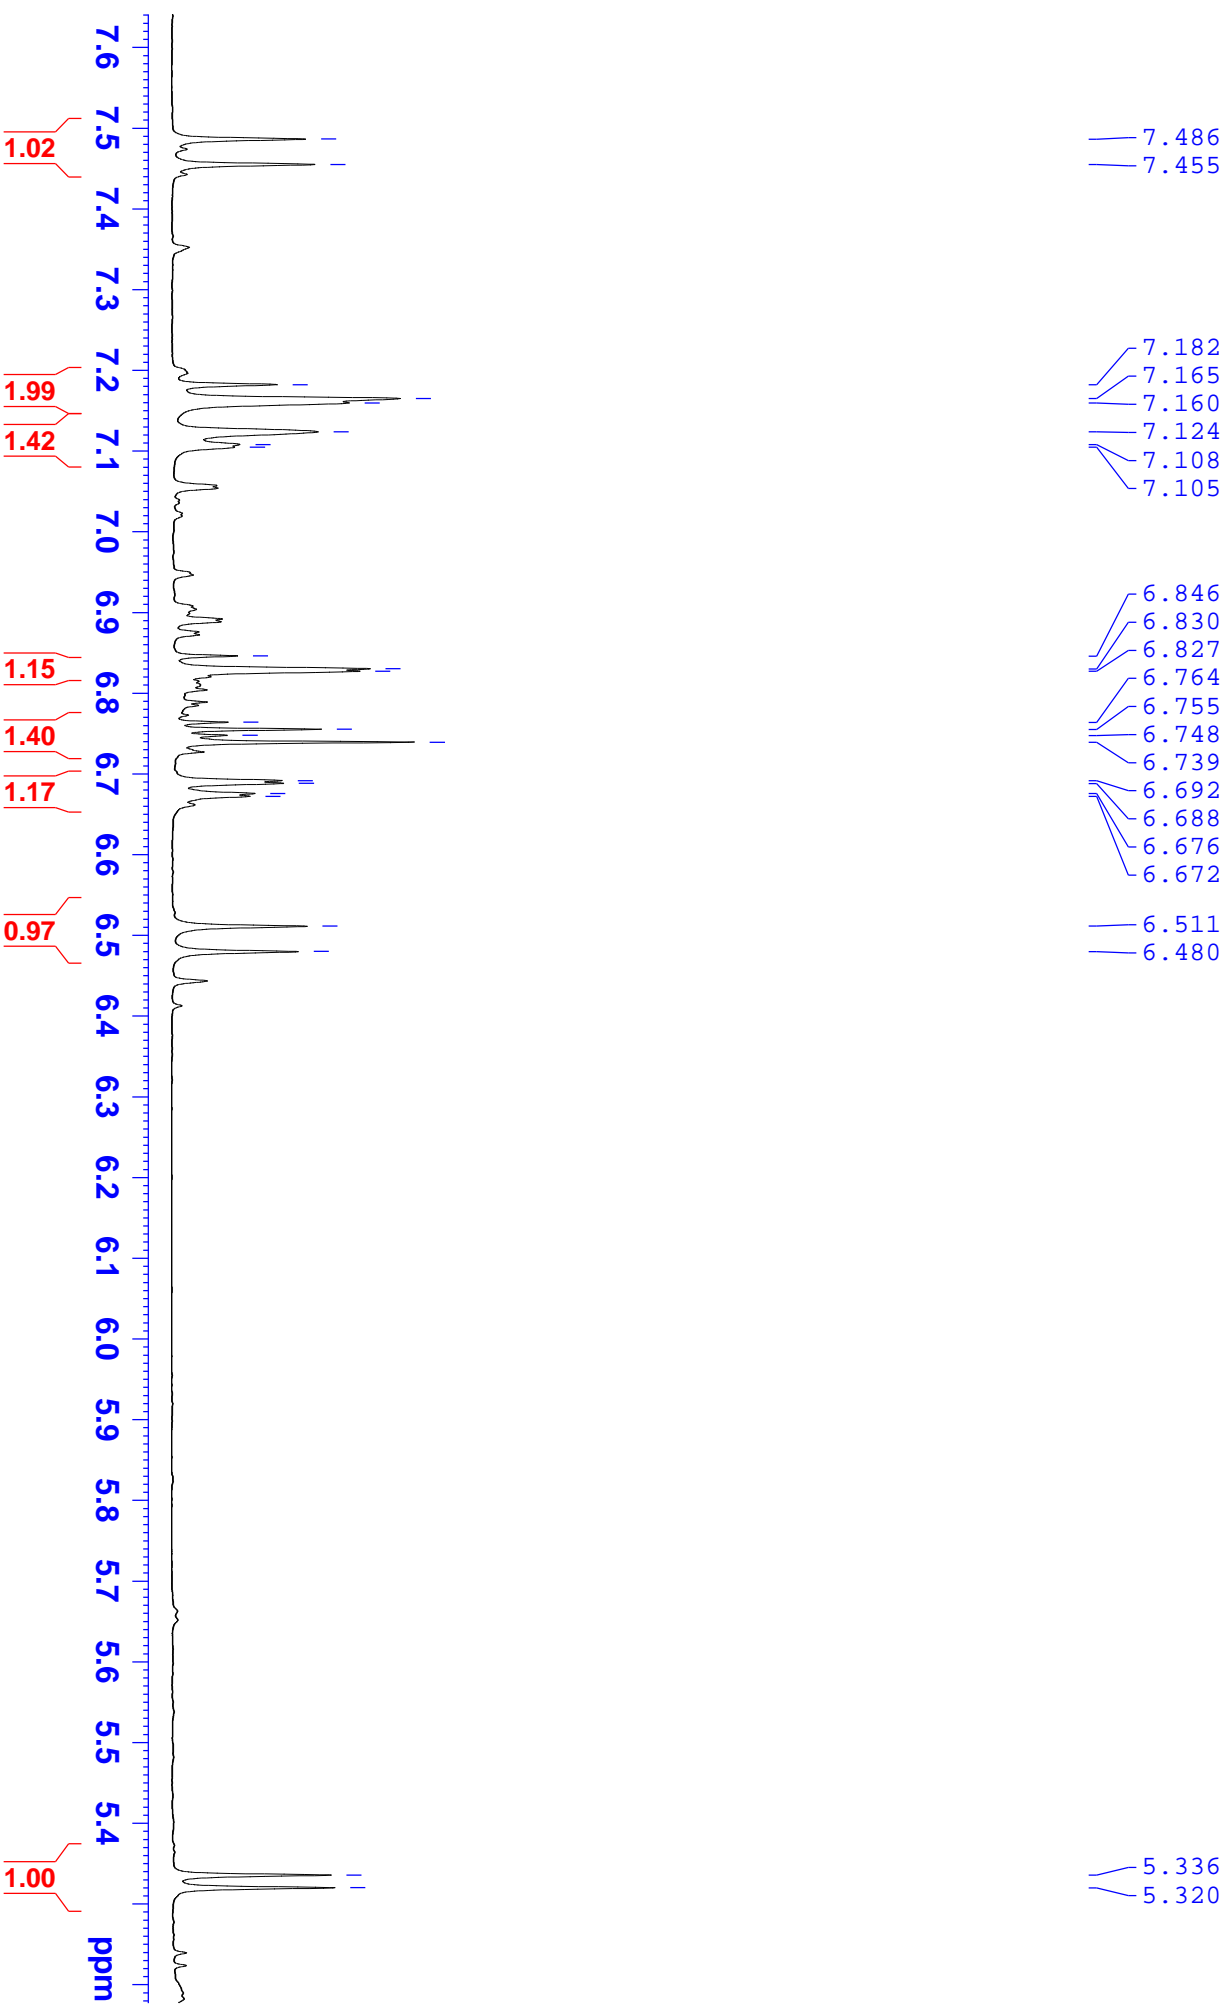

CB3-MeOD-1H

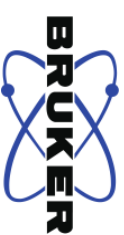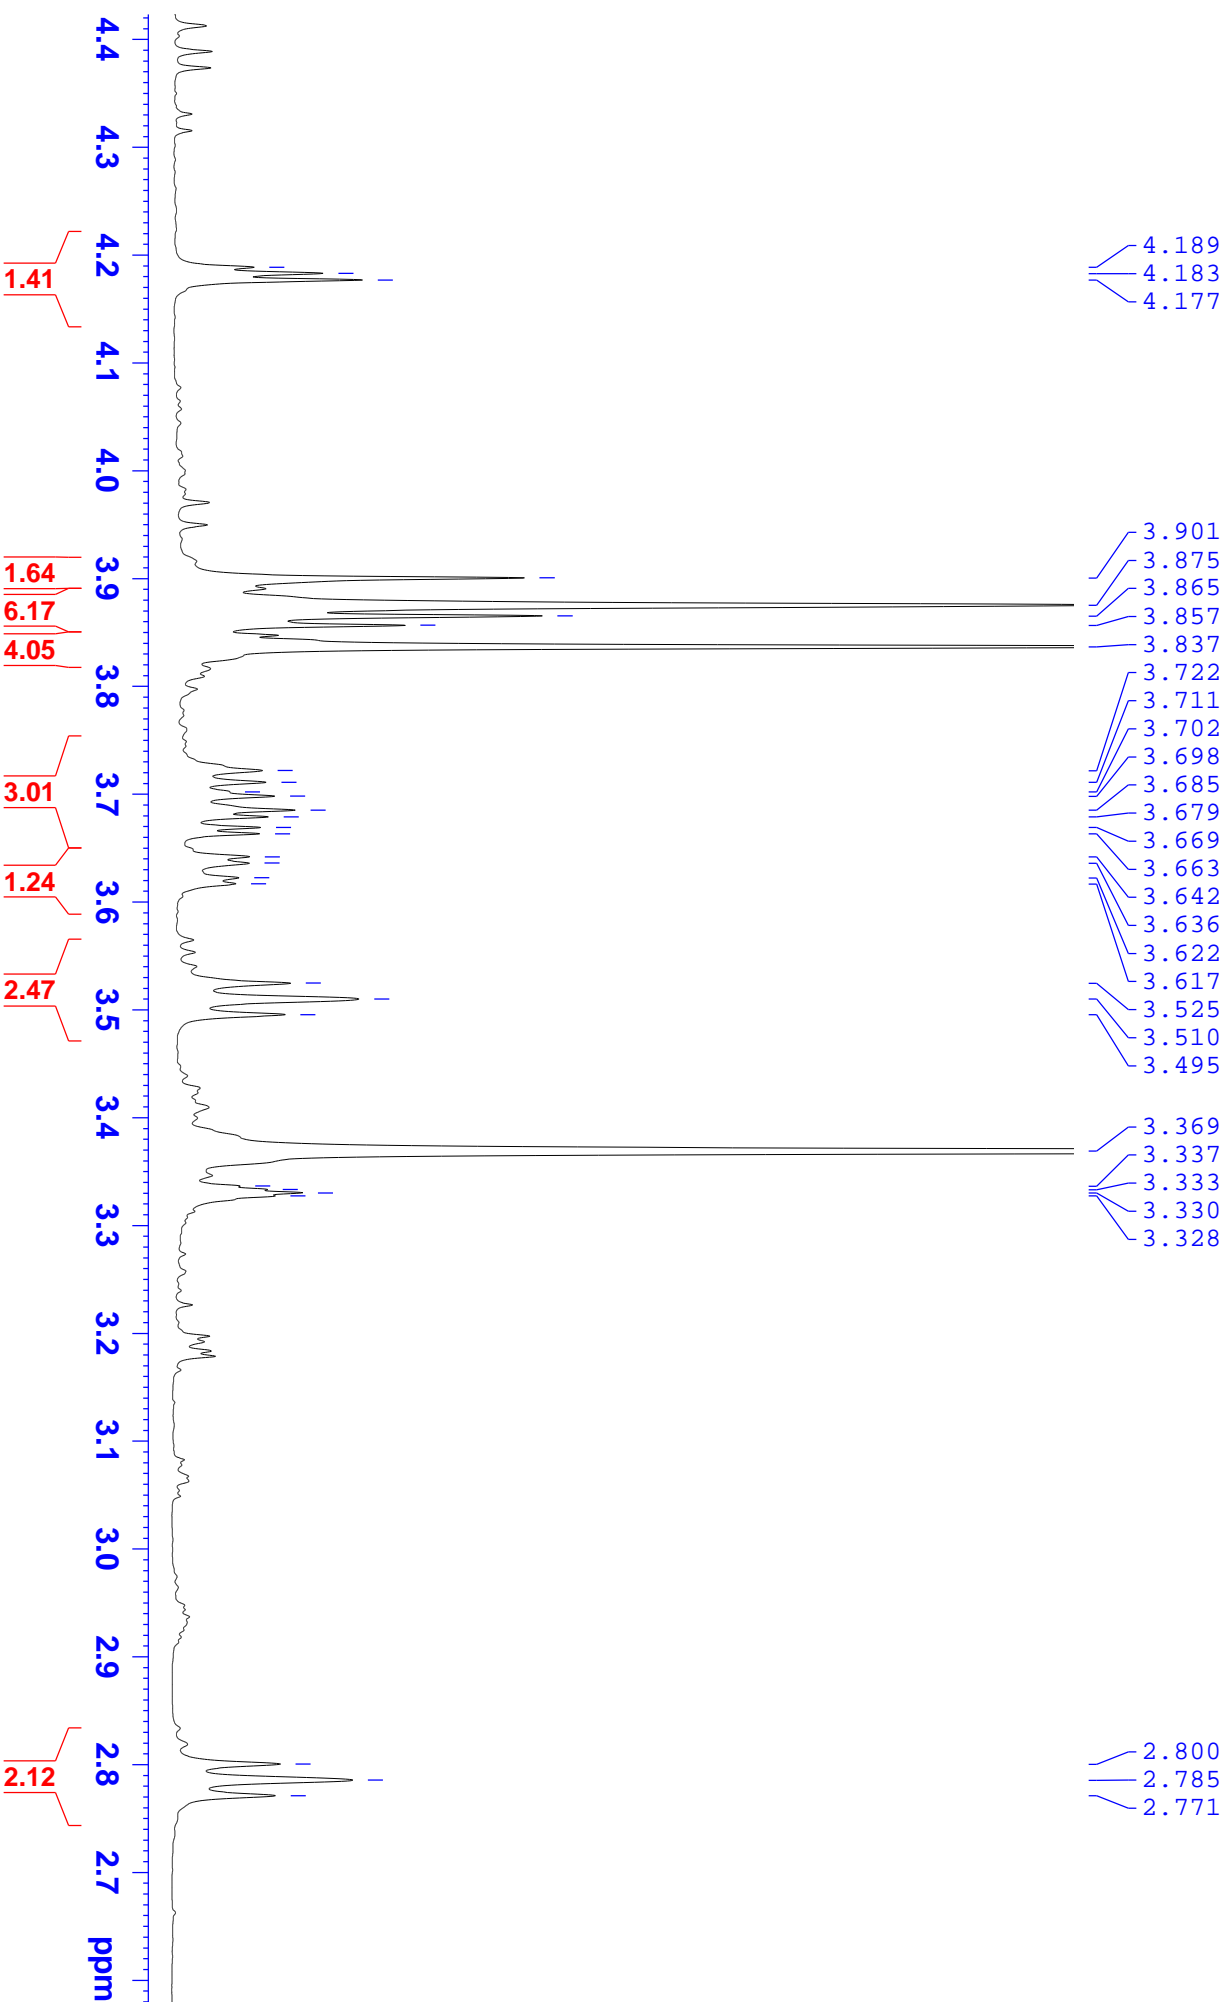

Supplement: s1 [file s1]
