# Supplementary material for: Chemical Constituents from Cimicifuga dahurica and Their Anti-Proliferative Effects on MCF-7 Breast Cancer Cells
Source: MDPI journal article supplement (doi:10.3390/molecules23051083), 2018-05-04

# CB6-MeOD-C13CPD&DEPT

DEPT90

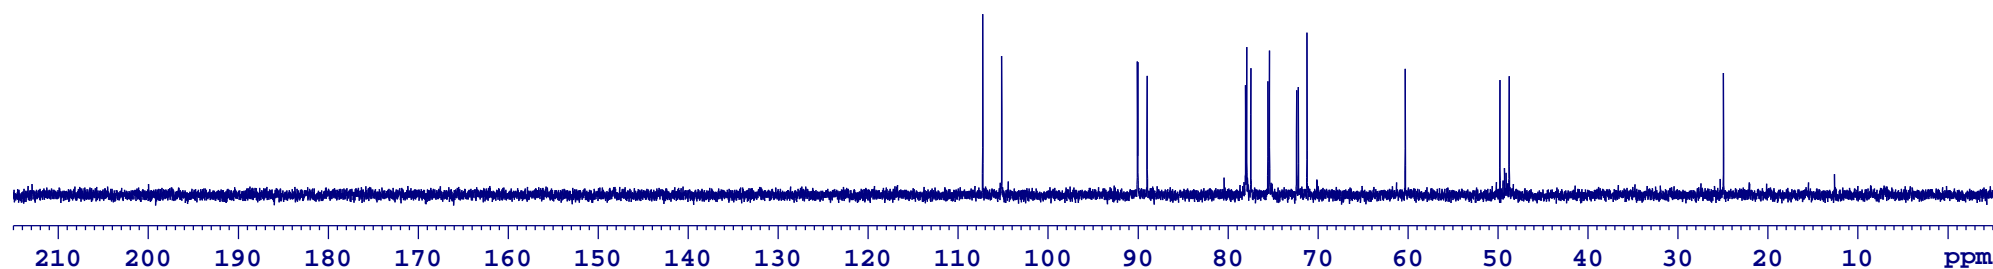

DEPT135

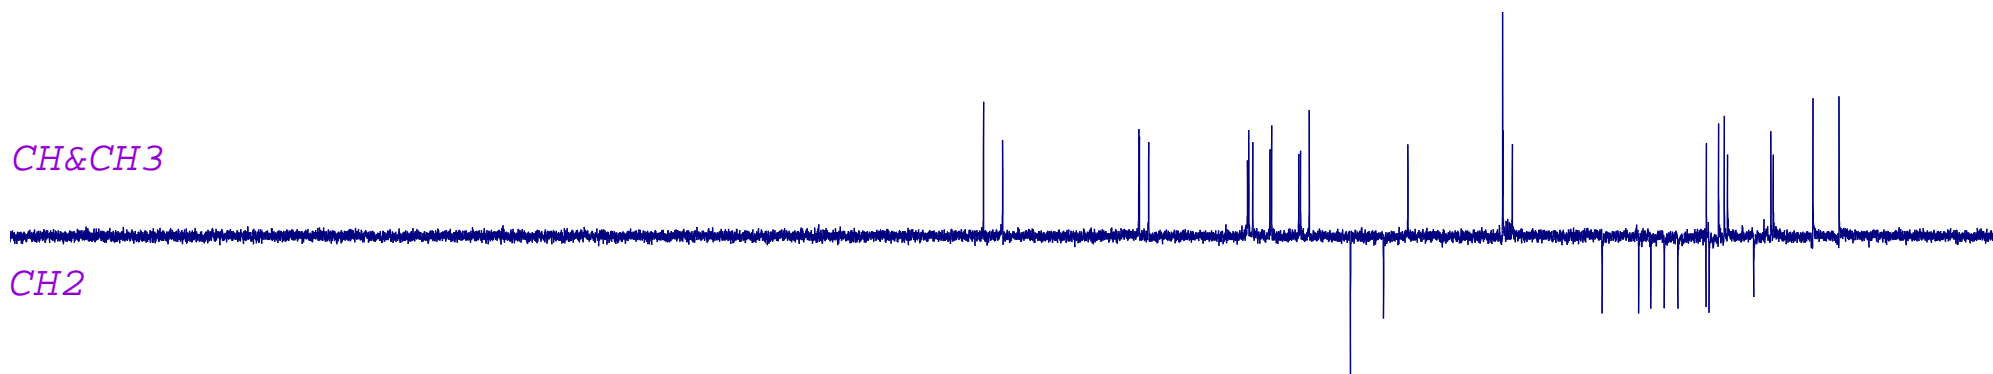

CH&CH3

CH2

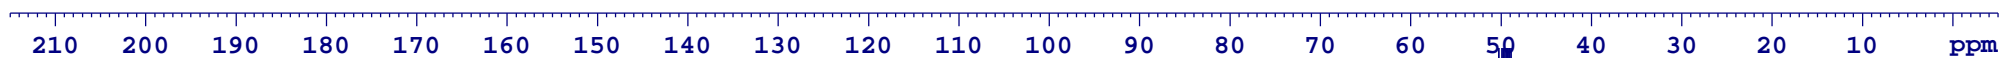

C13CPD

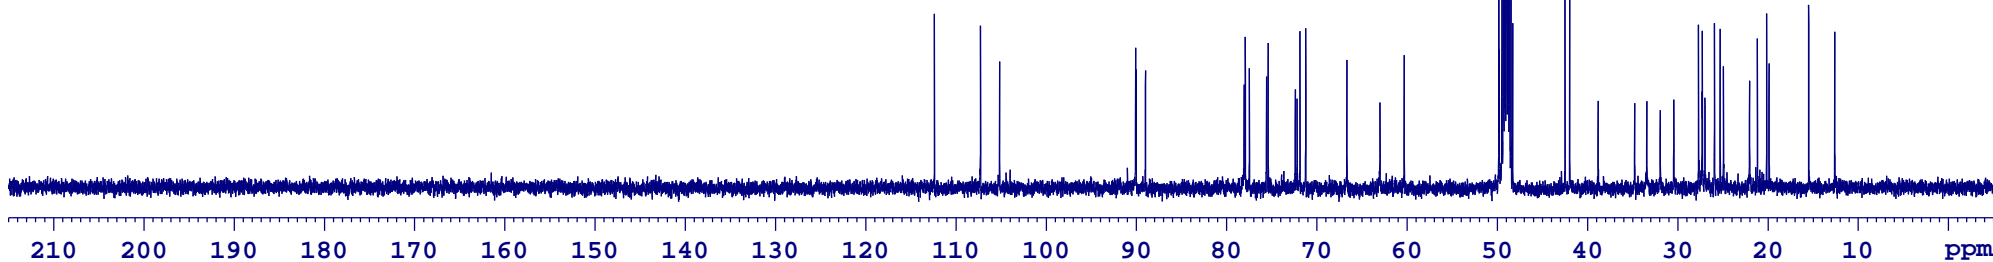

# CB6-MeOD-C13CPD&DEPT

DEPT90

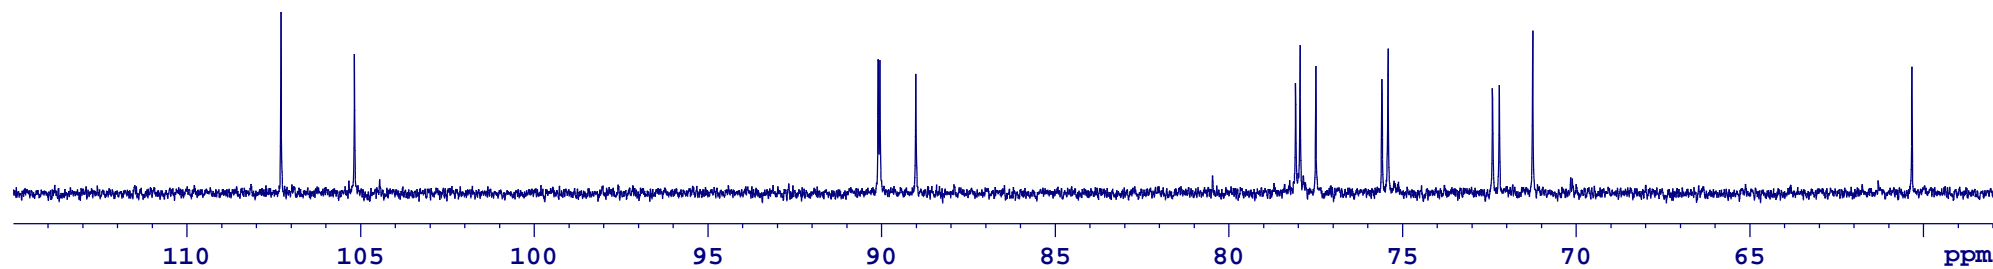

DEPT135

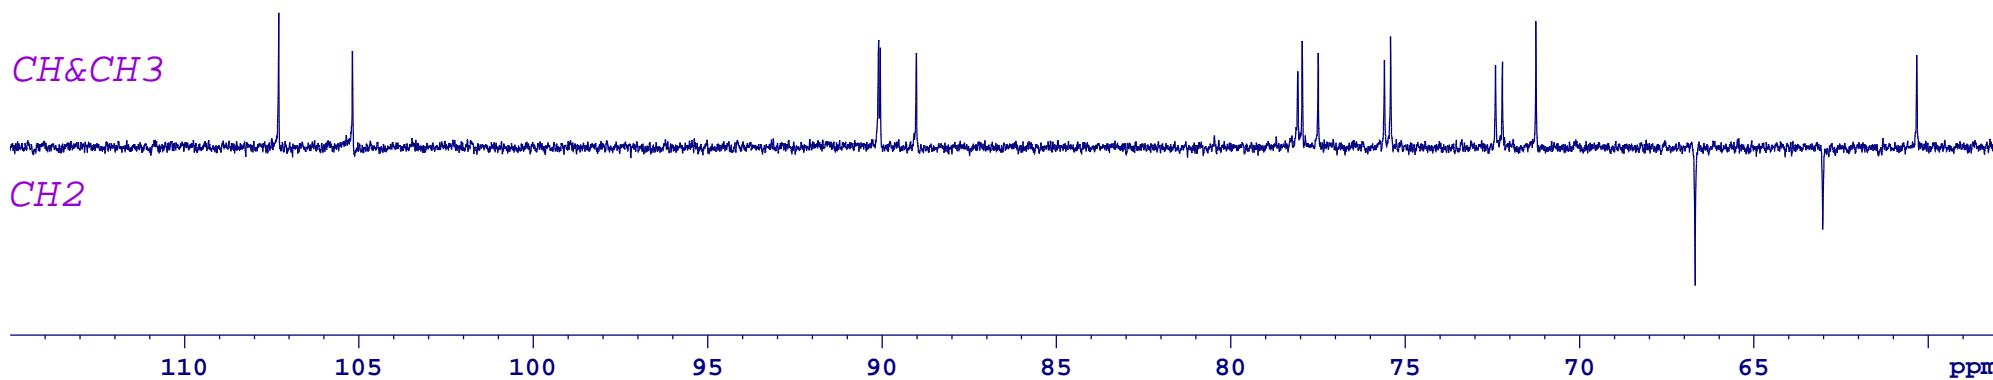

C13CPD

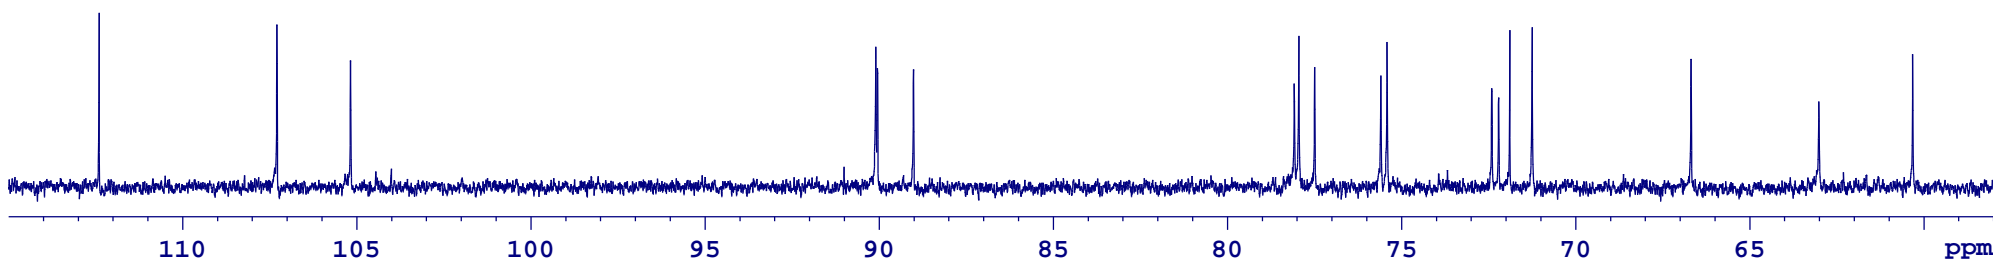

# CB6-MeOD-C13CPD&DEPT

DEPT90

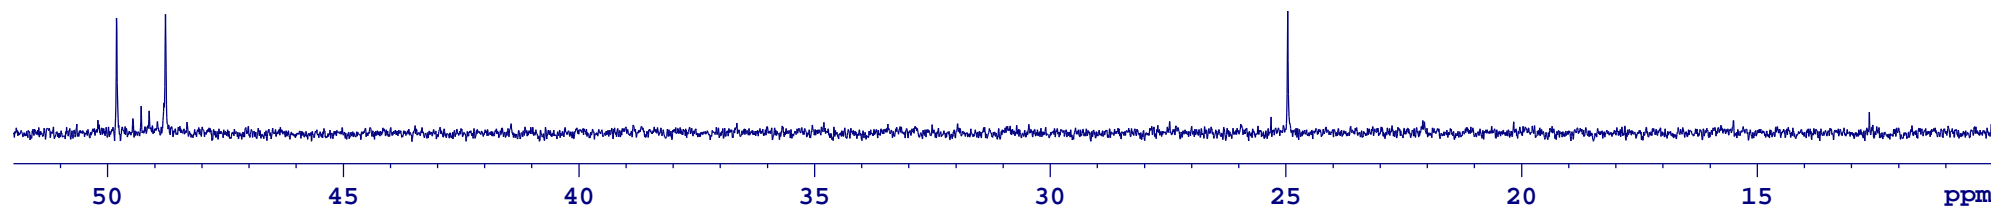

DEPT135

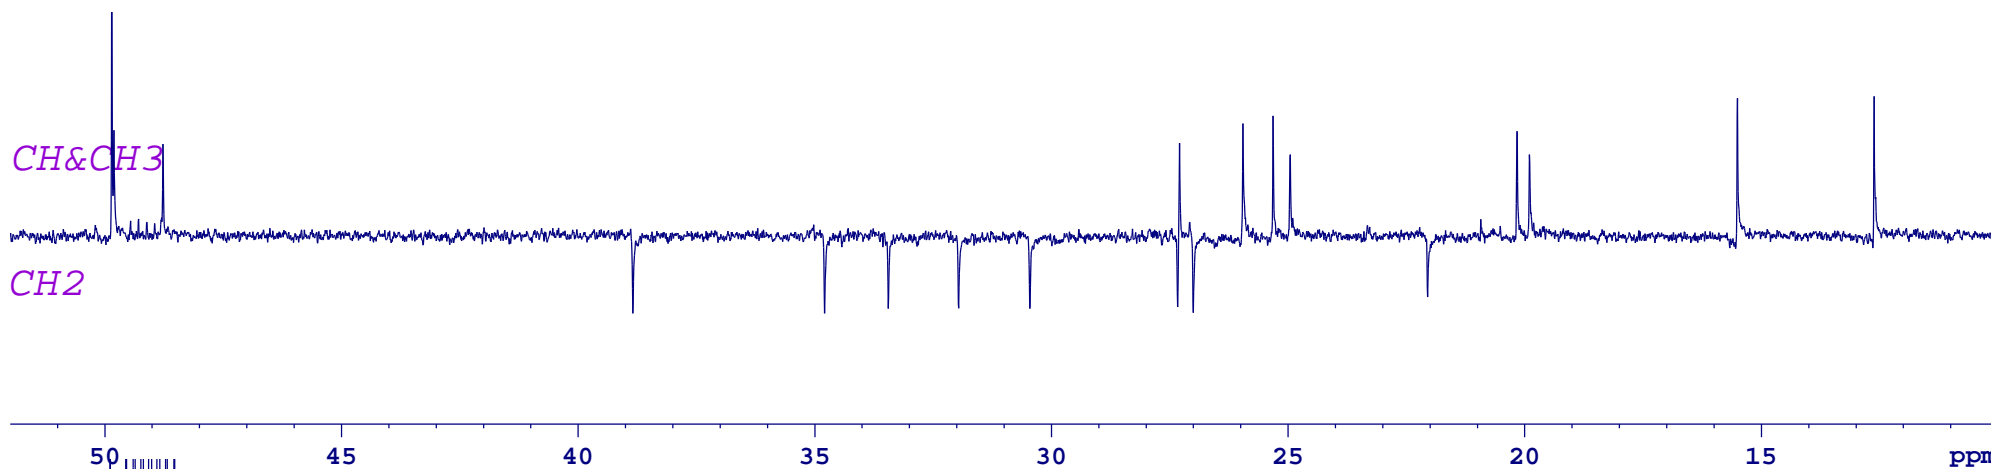

C13CPD

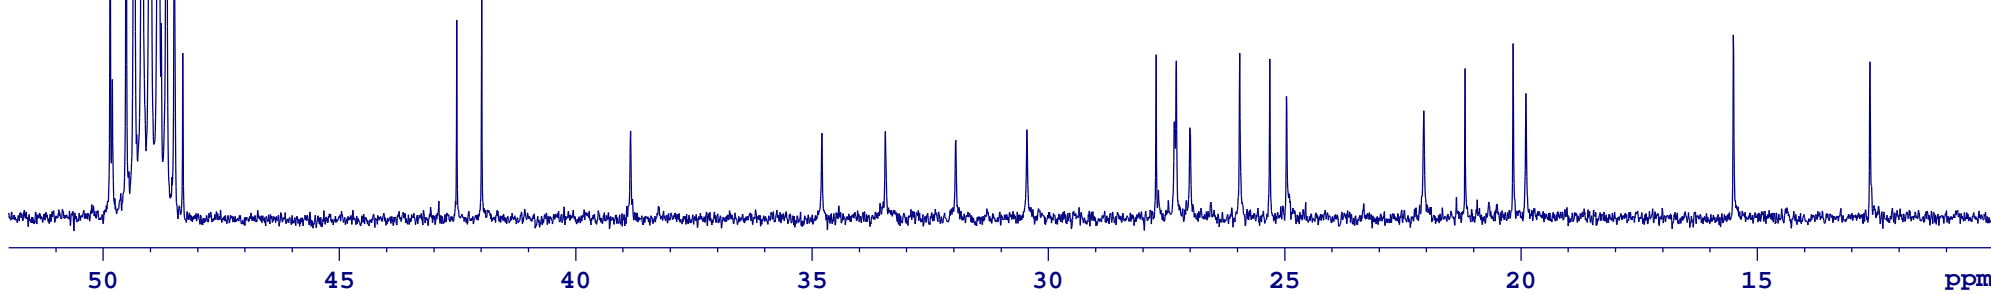

Supplement: s1 [file s1]
