# Supplementary material for: Chemical Constituents from Cimicifuga dahurica and Their Anti-Proliferative Effects on MCF-7 Breast Cancer Cells
Source: MDPI journal article supplement (doi:10.3390/molecules23051083), 2018-05-04

# CB4-MeOD-1H

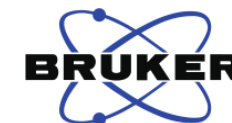

6.736  
5.175  
5.160  
4.827  
4.792  
4.785  
4.335  
4.322  
4.317  
4.304  
4.197  
4.159  
4.154  
4.149  
3.975  
3.969  
3.957  
3.950  
3.879  
3.864  
3.846  
3.837  
3.800  
3.786  
3.781  
3.778  
3.773  
3.705  
3.696  
3.684  
3.679  
3.670  
3.667  
3.661  
3.657  
3.653  
3.648  
3.637  
3.631  
3.621  
3.615  
3.369  
3.337  
3.333  
3.330  
3.327  
3.324  
3.173

## Current Data Parameters

NAME 11D\_CB4  
EXPNO 1  
PROCNO 1

## F2 - Acquisition Parameters

Date\_ 20170601  
Time 16.18  
INSTRUM spect  
PROBHD 5 mm PABBO BB/  
PULPROG zg30  
TD 65536  
SOLVENT MeOD  
NS 16  
DS 2  
SWH 10000.000 Hz  
FIDRES 0.152588 Hz  
AQ 3.2767999 sec  
RG 79.36  
DW 50.000 usec  
DE 6.50 usec  
TE 303.0 K  
D1 1.00000000 sec  
TD0 1

## ==== CHANNEL f1 =====

SFO1 500.2030889 MHz  
NUC1 1H  
P1 10.00 usec  
PLW1 22.00000000 W

## F2 - Processing parameters

SI 65536  
SF 500.2000004 MHz  
WDW EM  
SSB 0  
LB 0.30 Hz  
GB 0  
PC 1.00

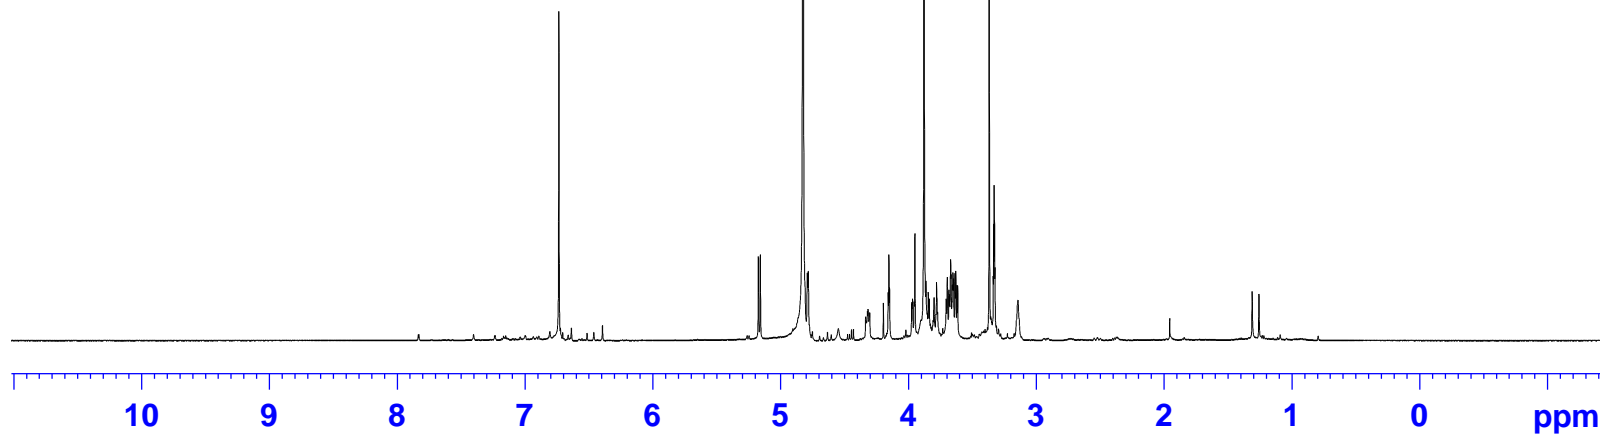

2.17

1.09  
1.29  
1.00  
1.07  
1.28  
6.98  
0.82  
1.39  
2.39  
2.48  
3.05  
1.08

CB4-MeOD-1H

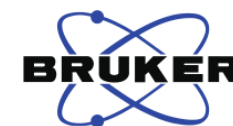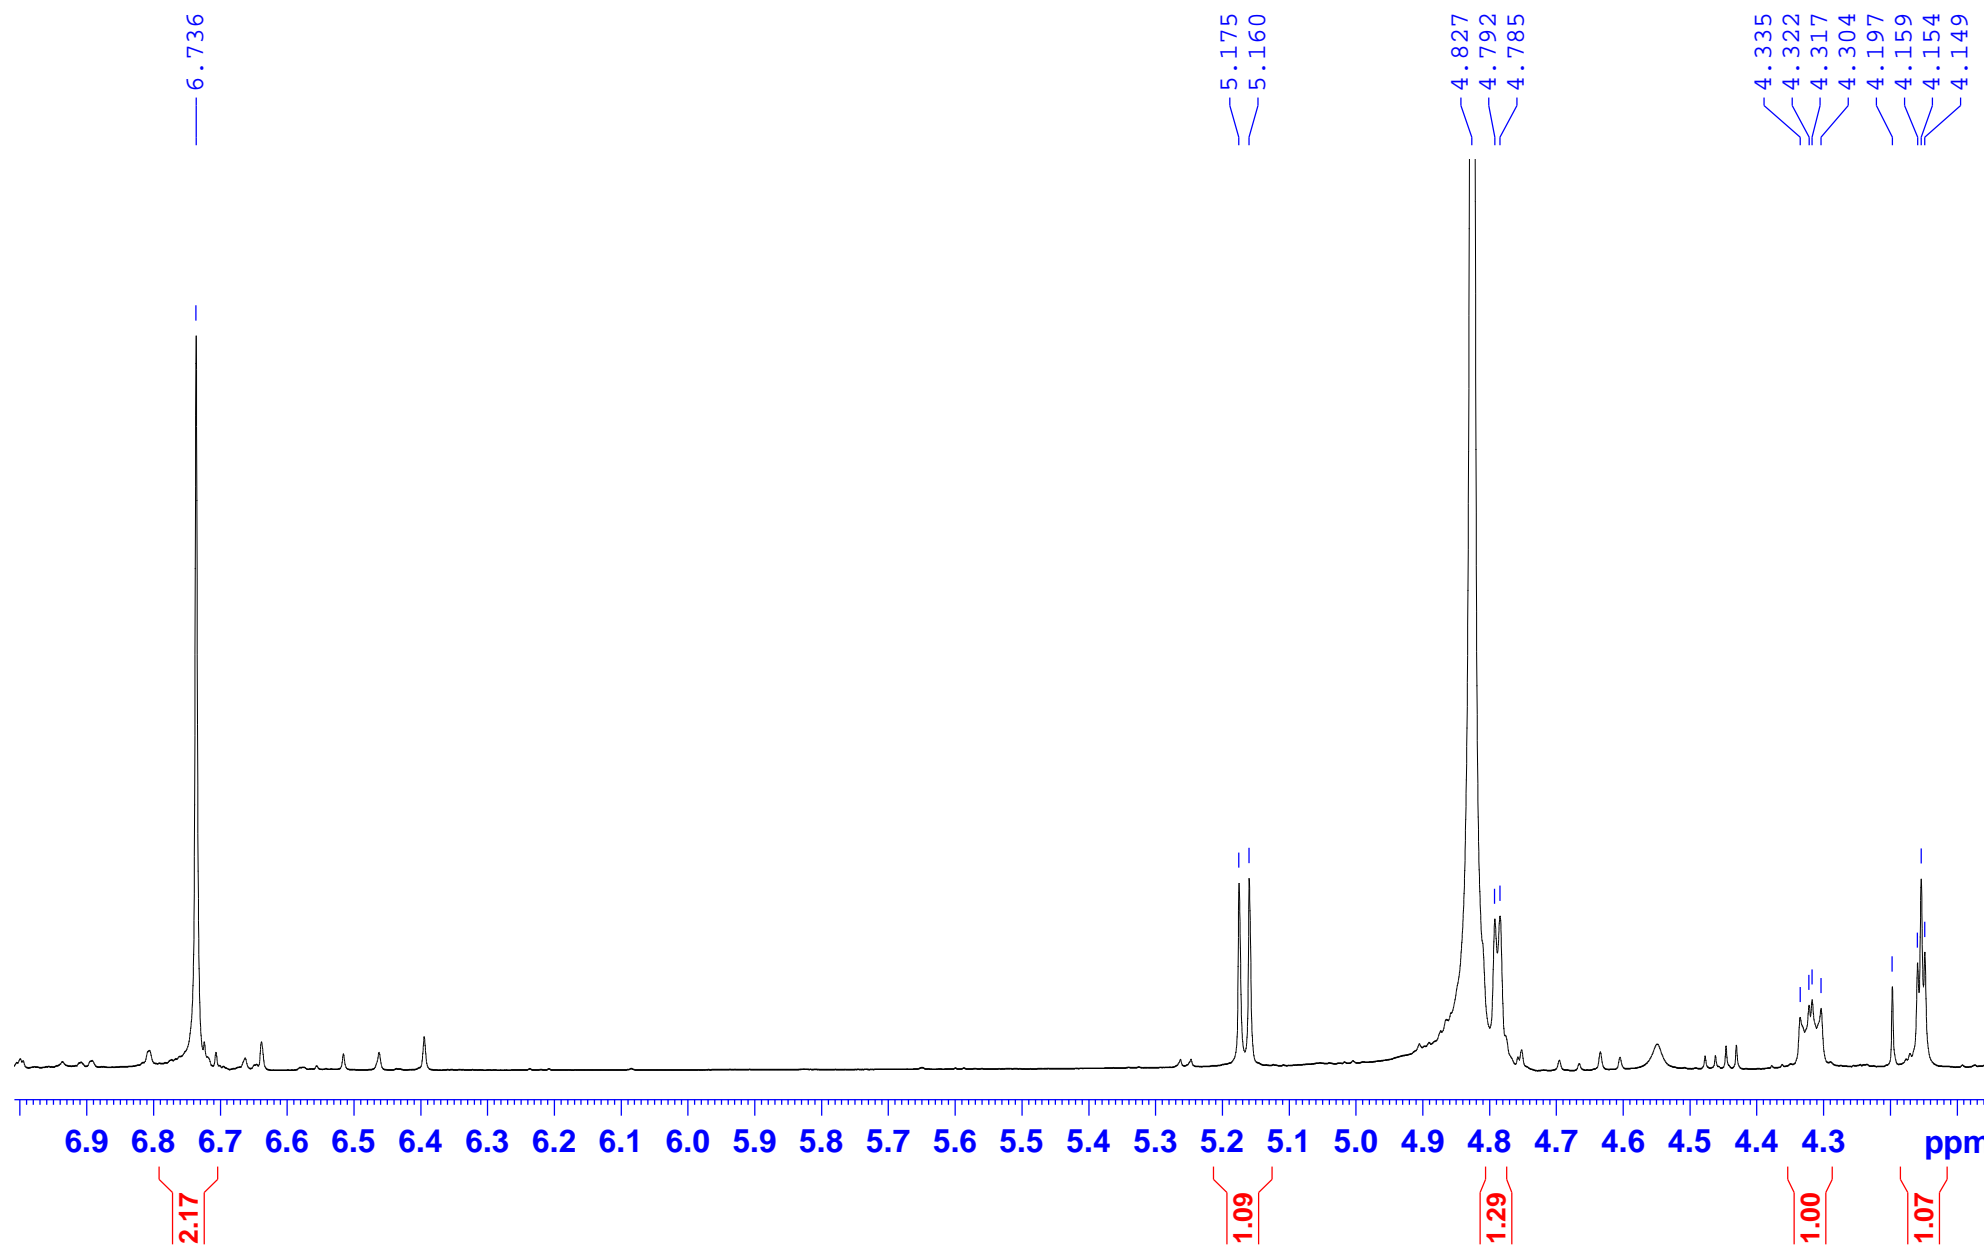

CB4-MeOD-1H

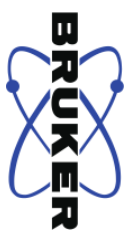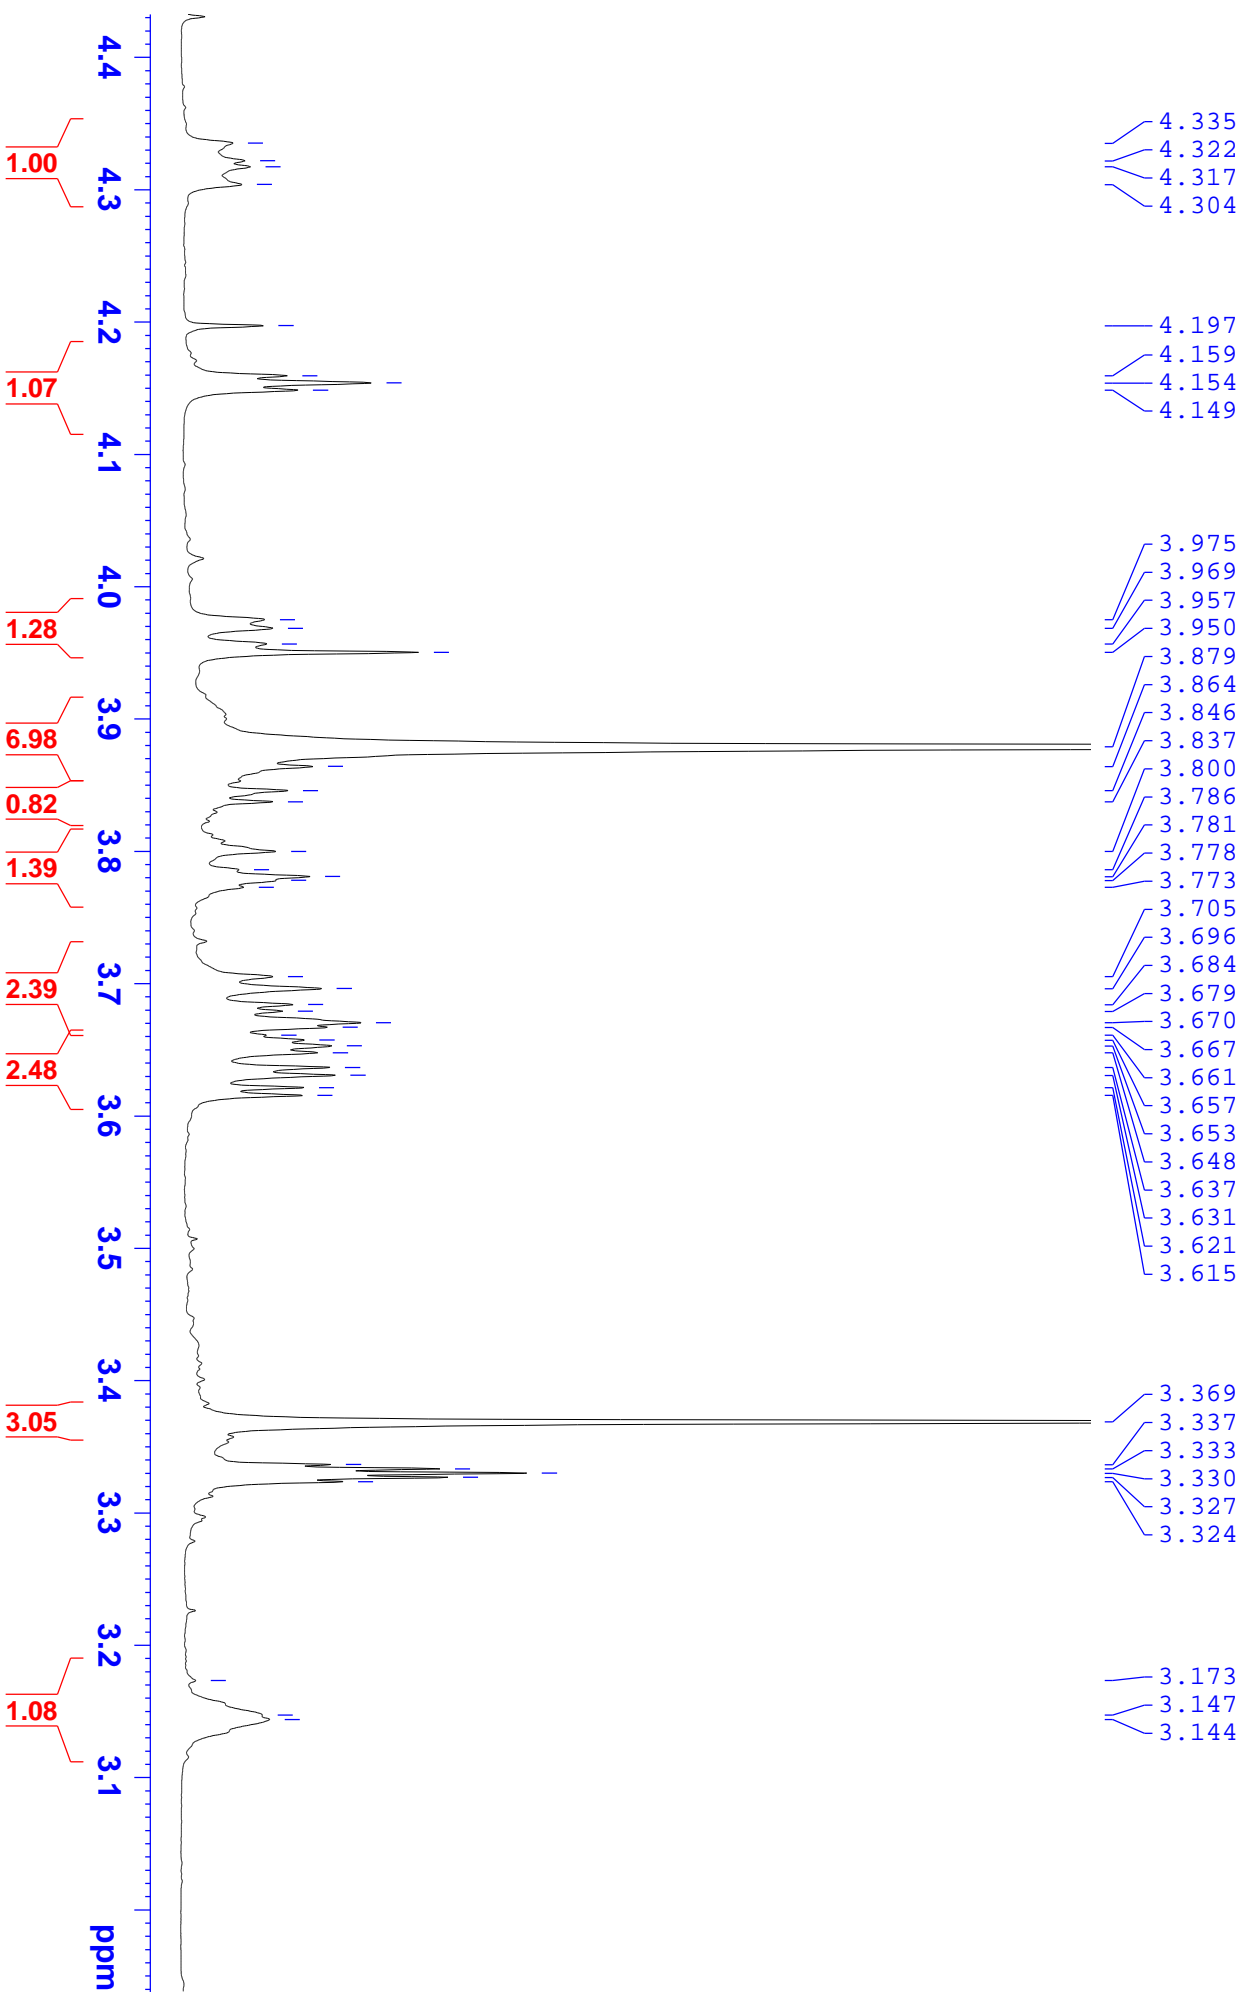

Supplement: s1 [file s1]
