# Supplementary figures and images for: Chemical Constituents from Cimicifuga dahurica and Their Anti-Proliferative Effects on MCF-7 Breast Cancer Cells
Source: MDPI journal article supplement (doi:10.3390/molecules23051083), 2018-05-04

*CB7-MeOD-HMBC*

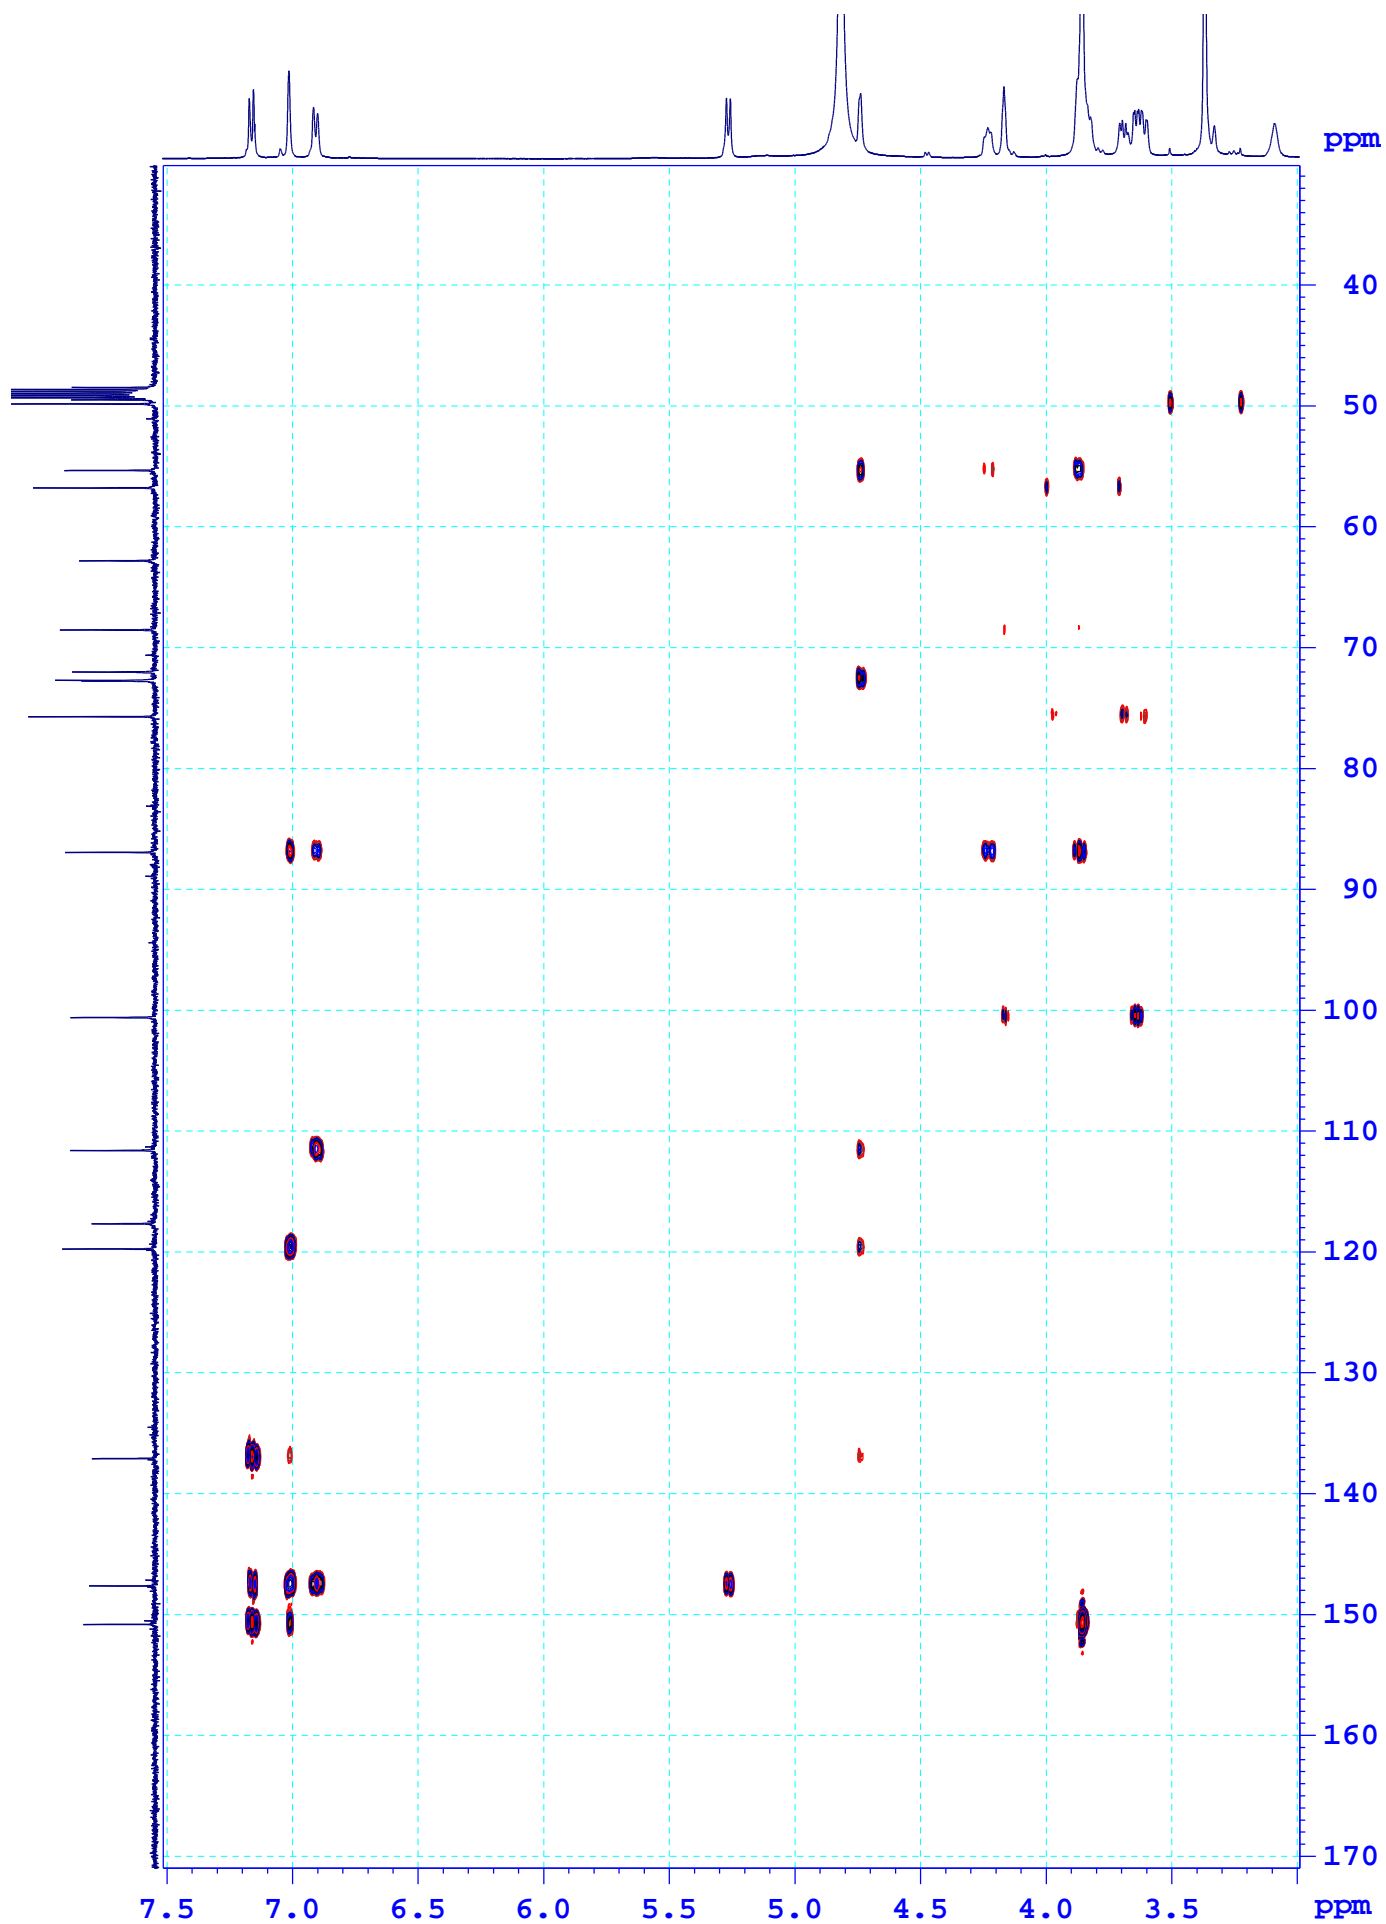

*CB7-MeOD-HMBC*

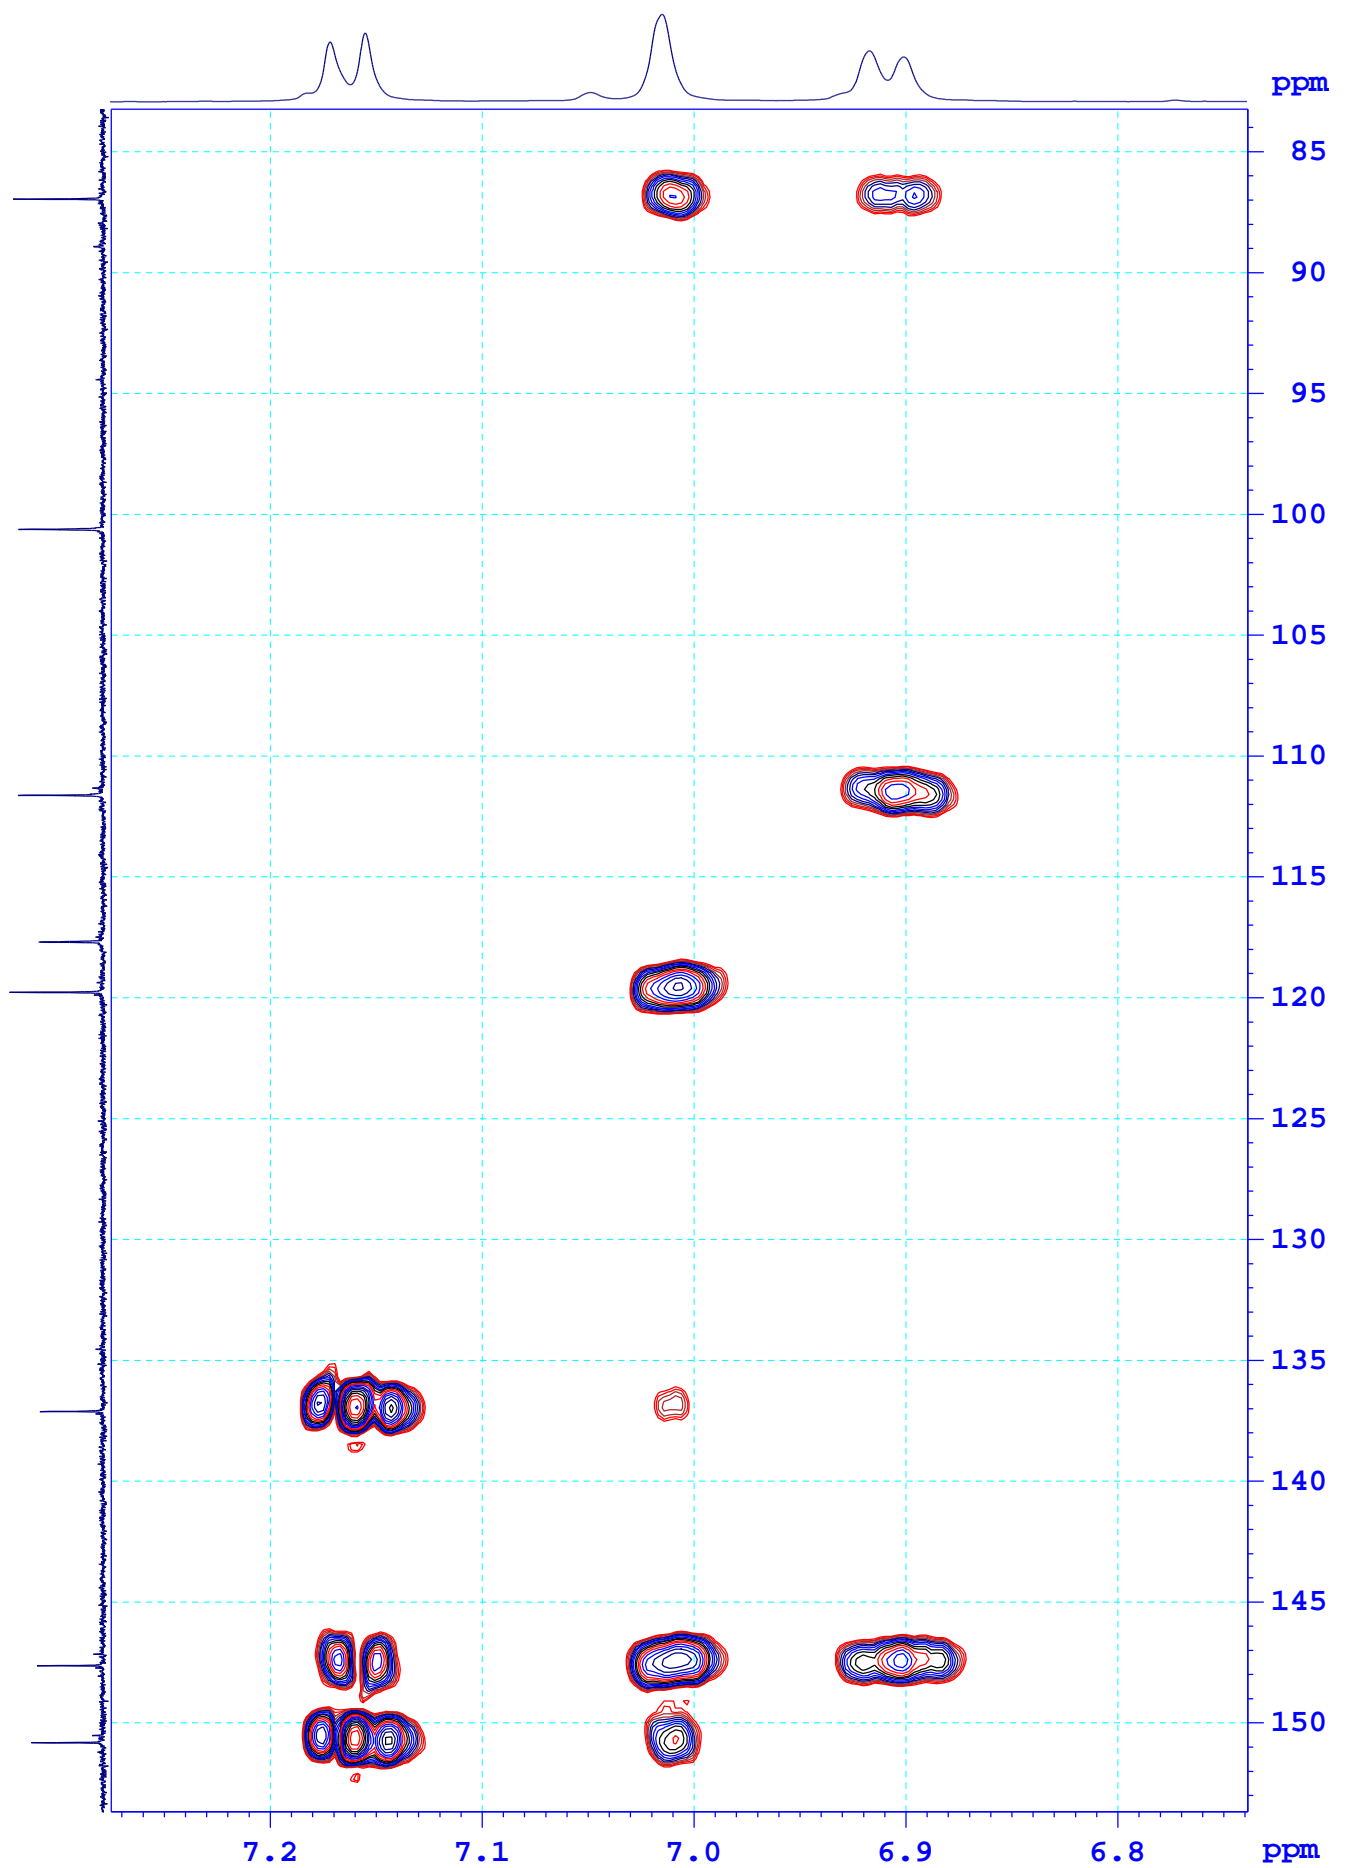

*CB7-MeOD-HMBC*

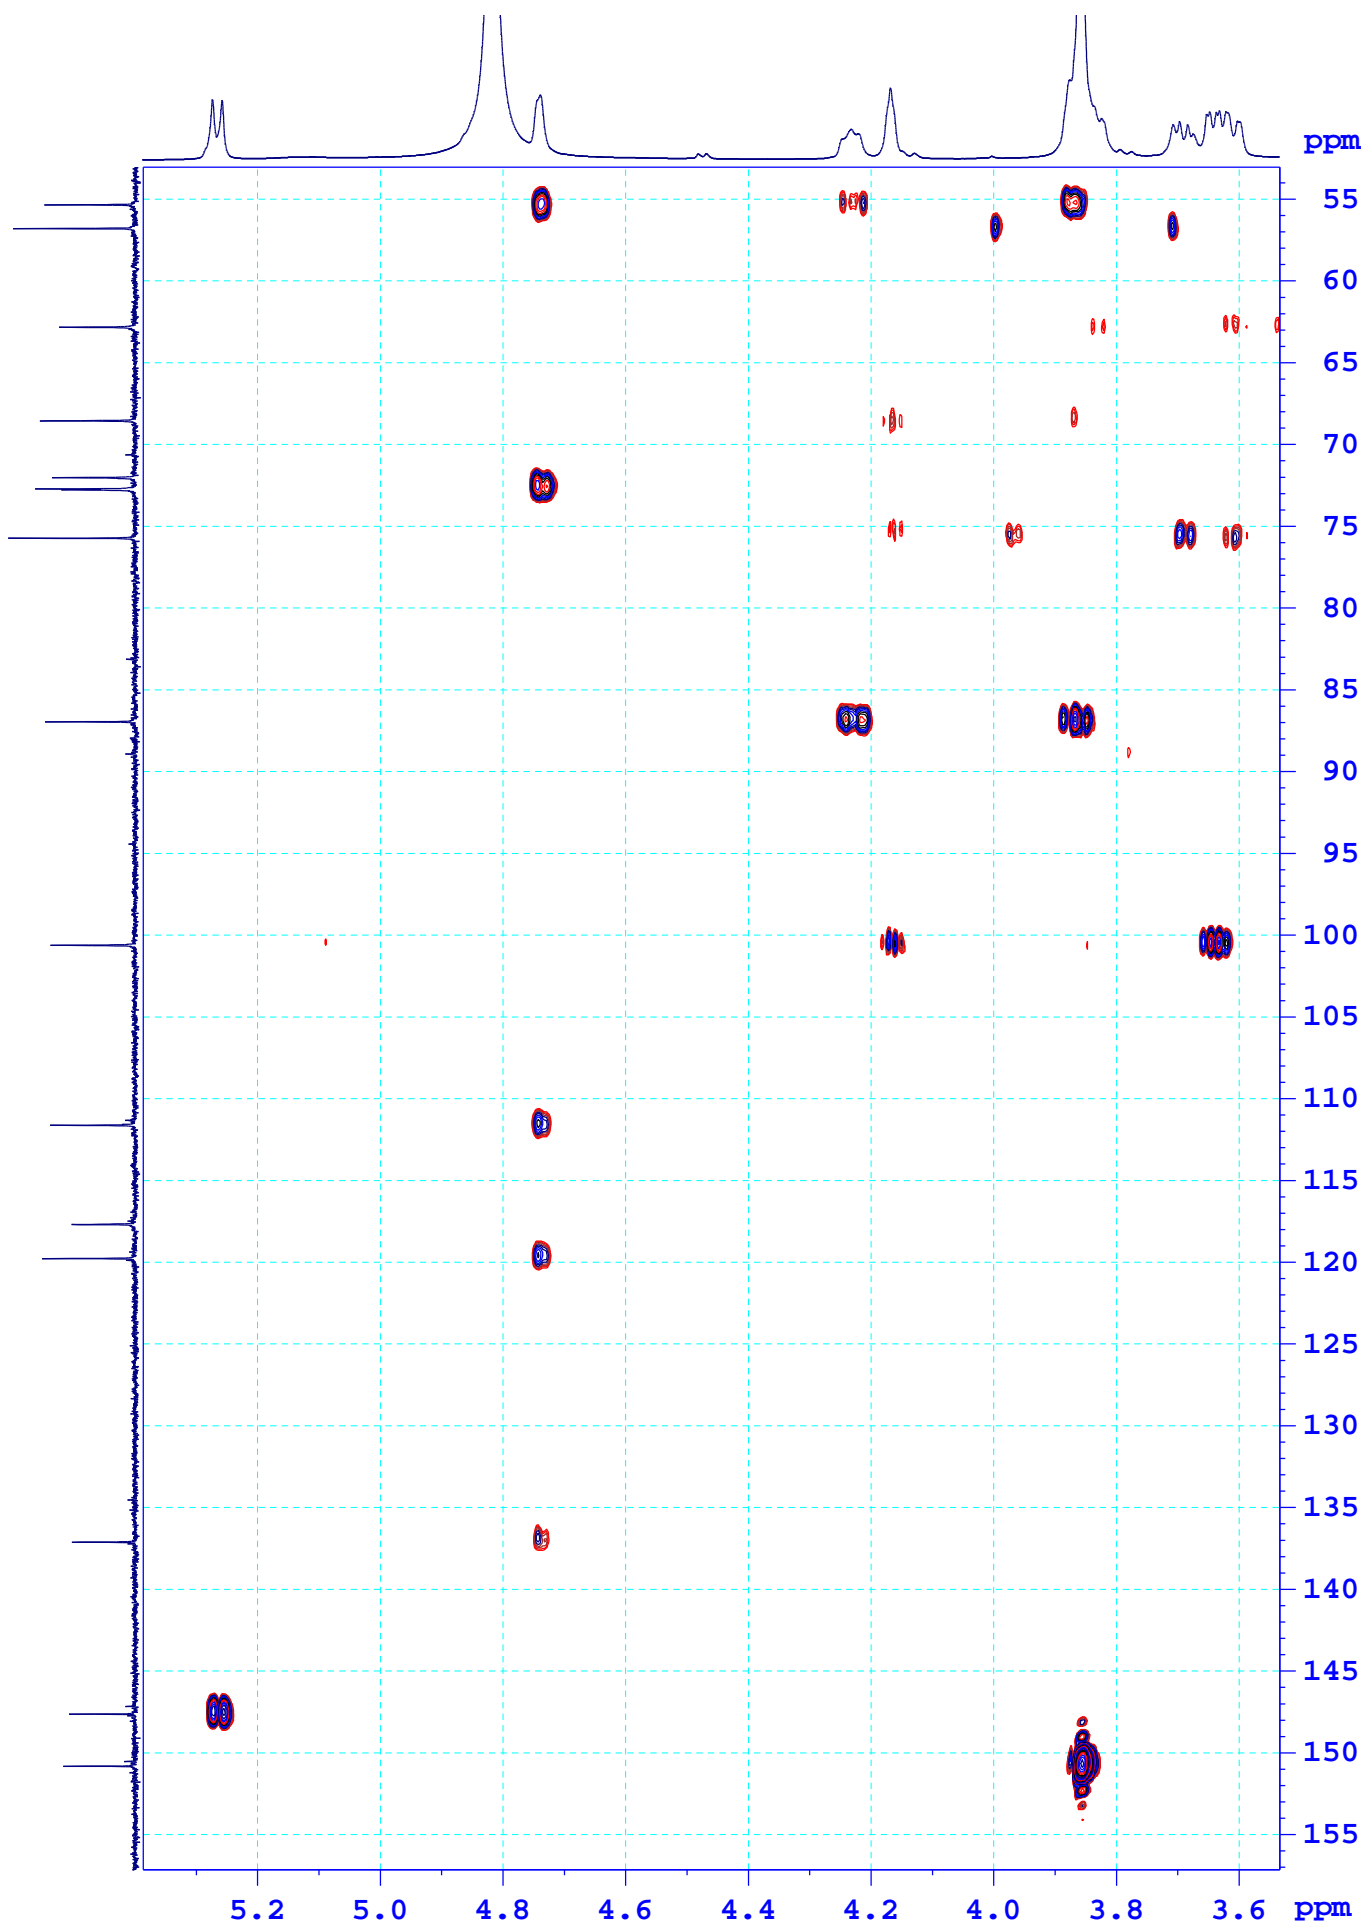

Supplement: s1 [file s1]

*CB4-MeOD-HSQC*

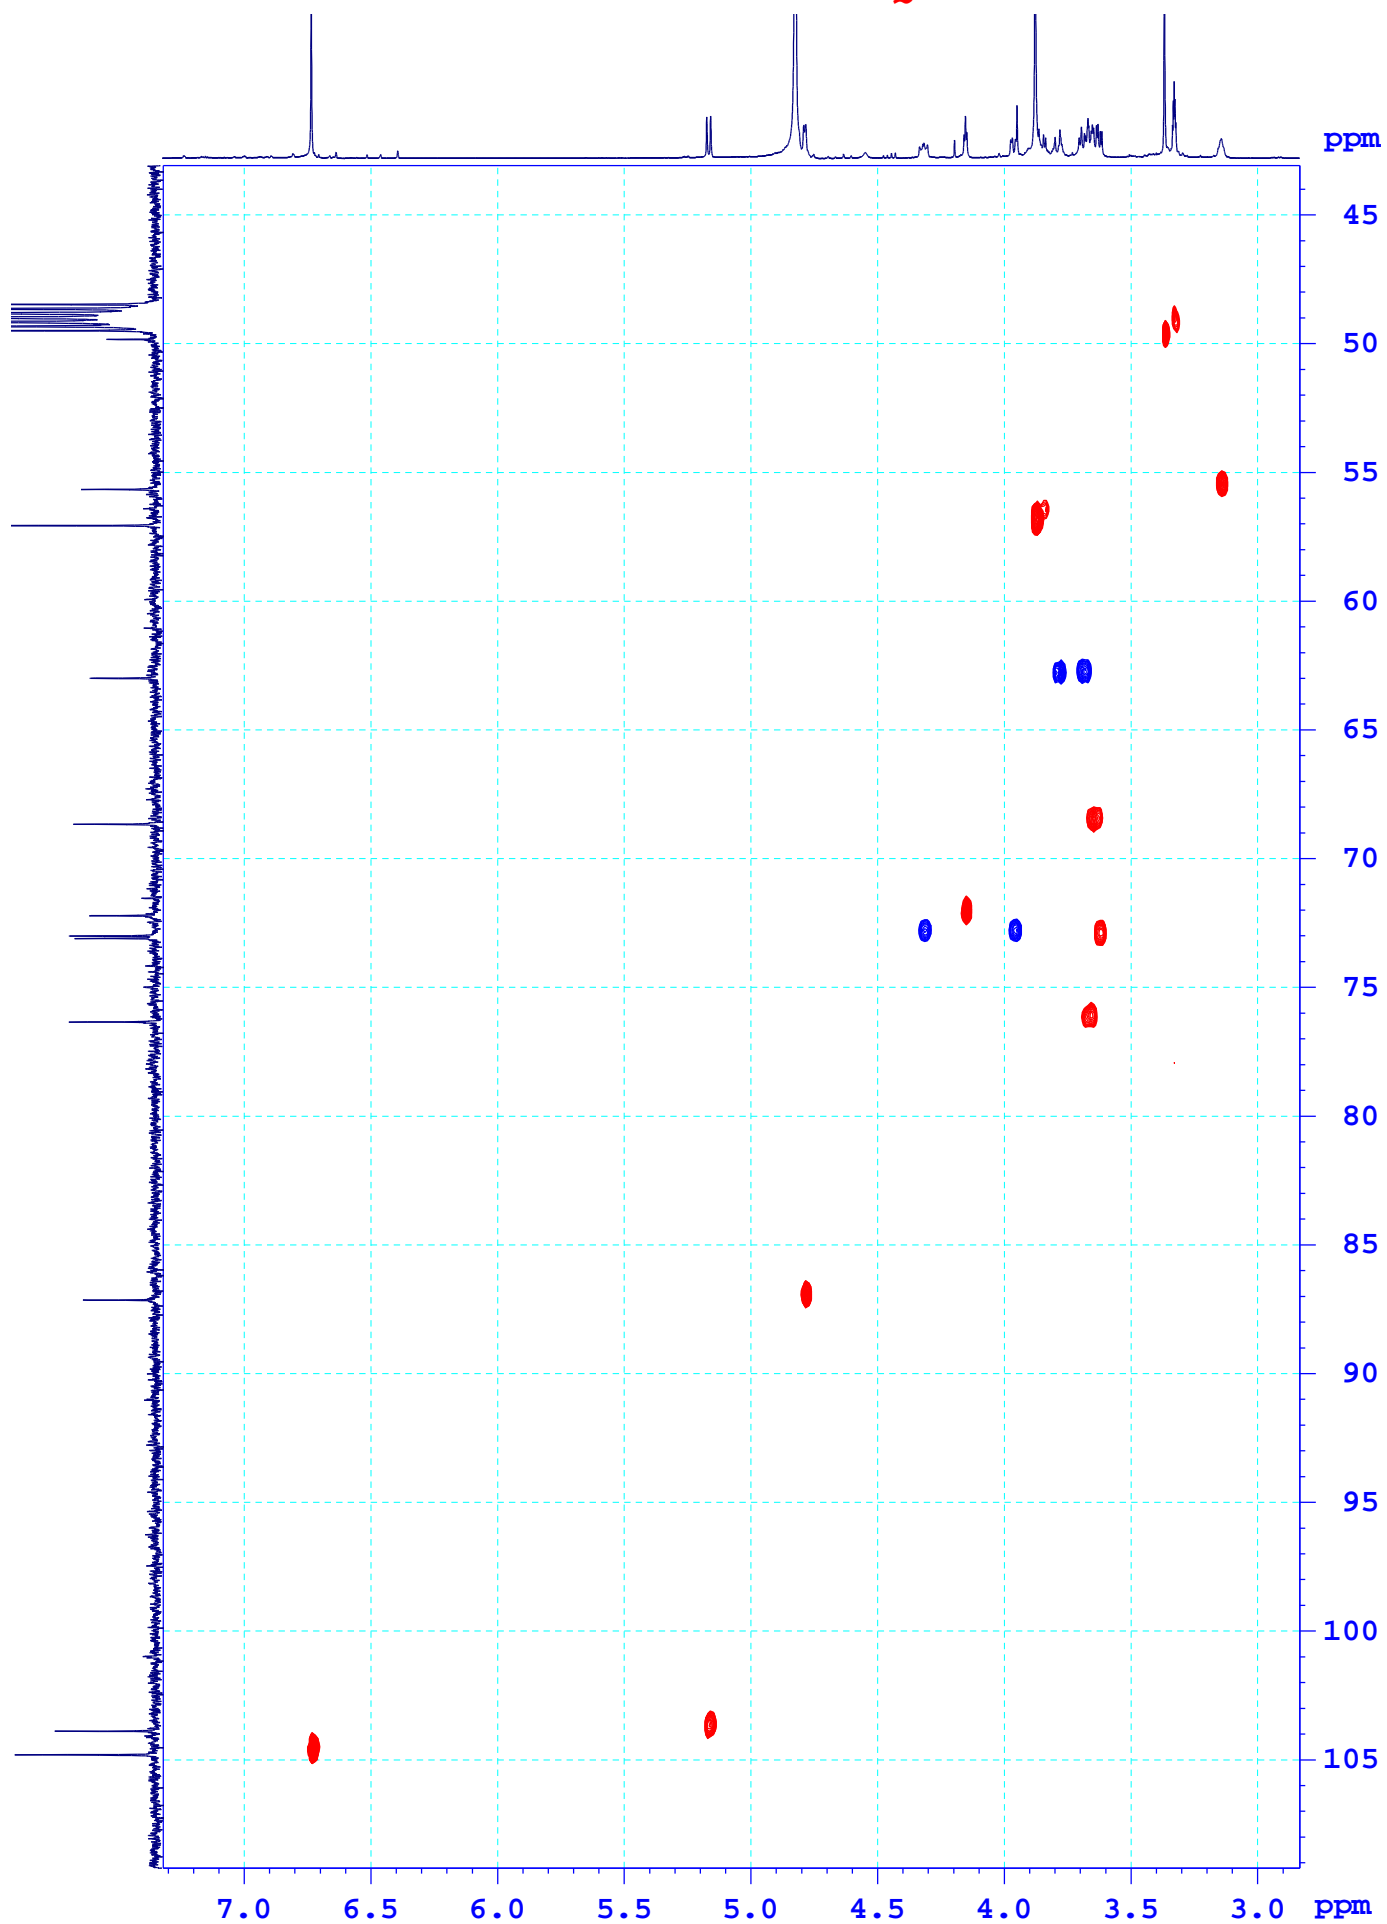

*CB4-MeOD-HSQC*

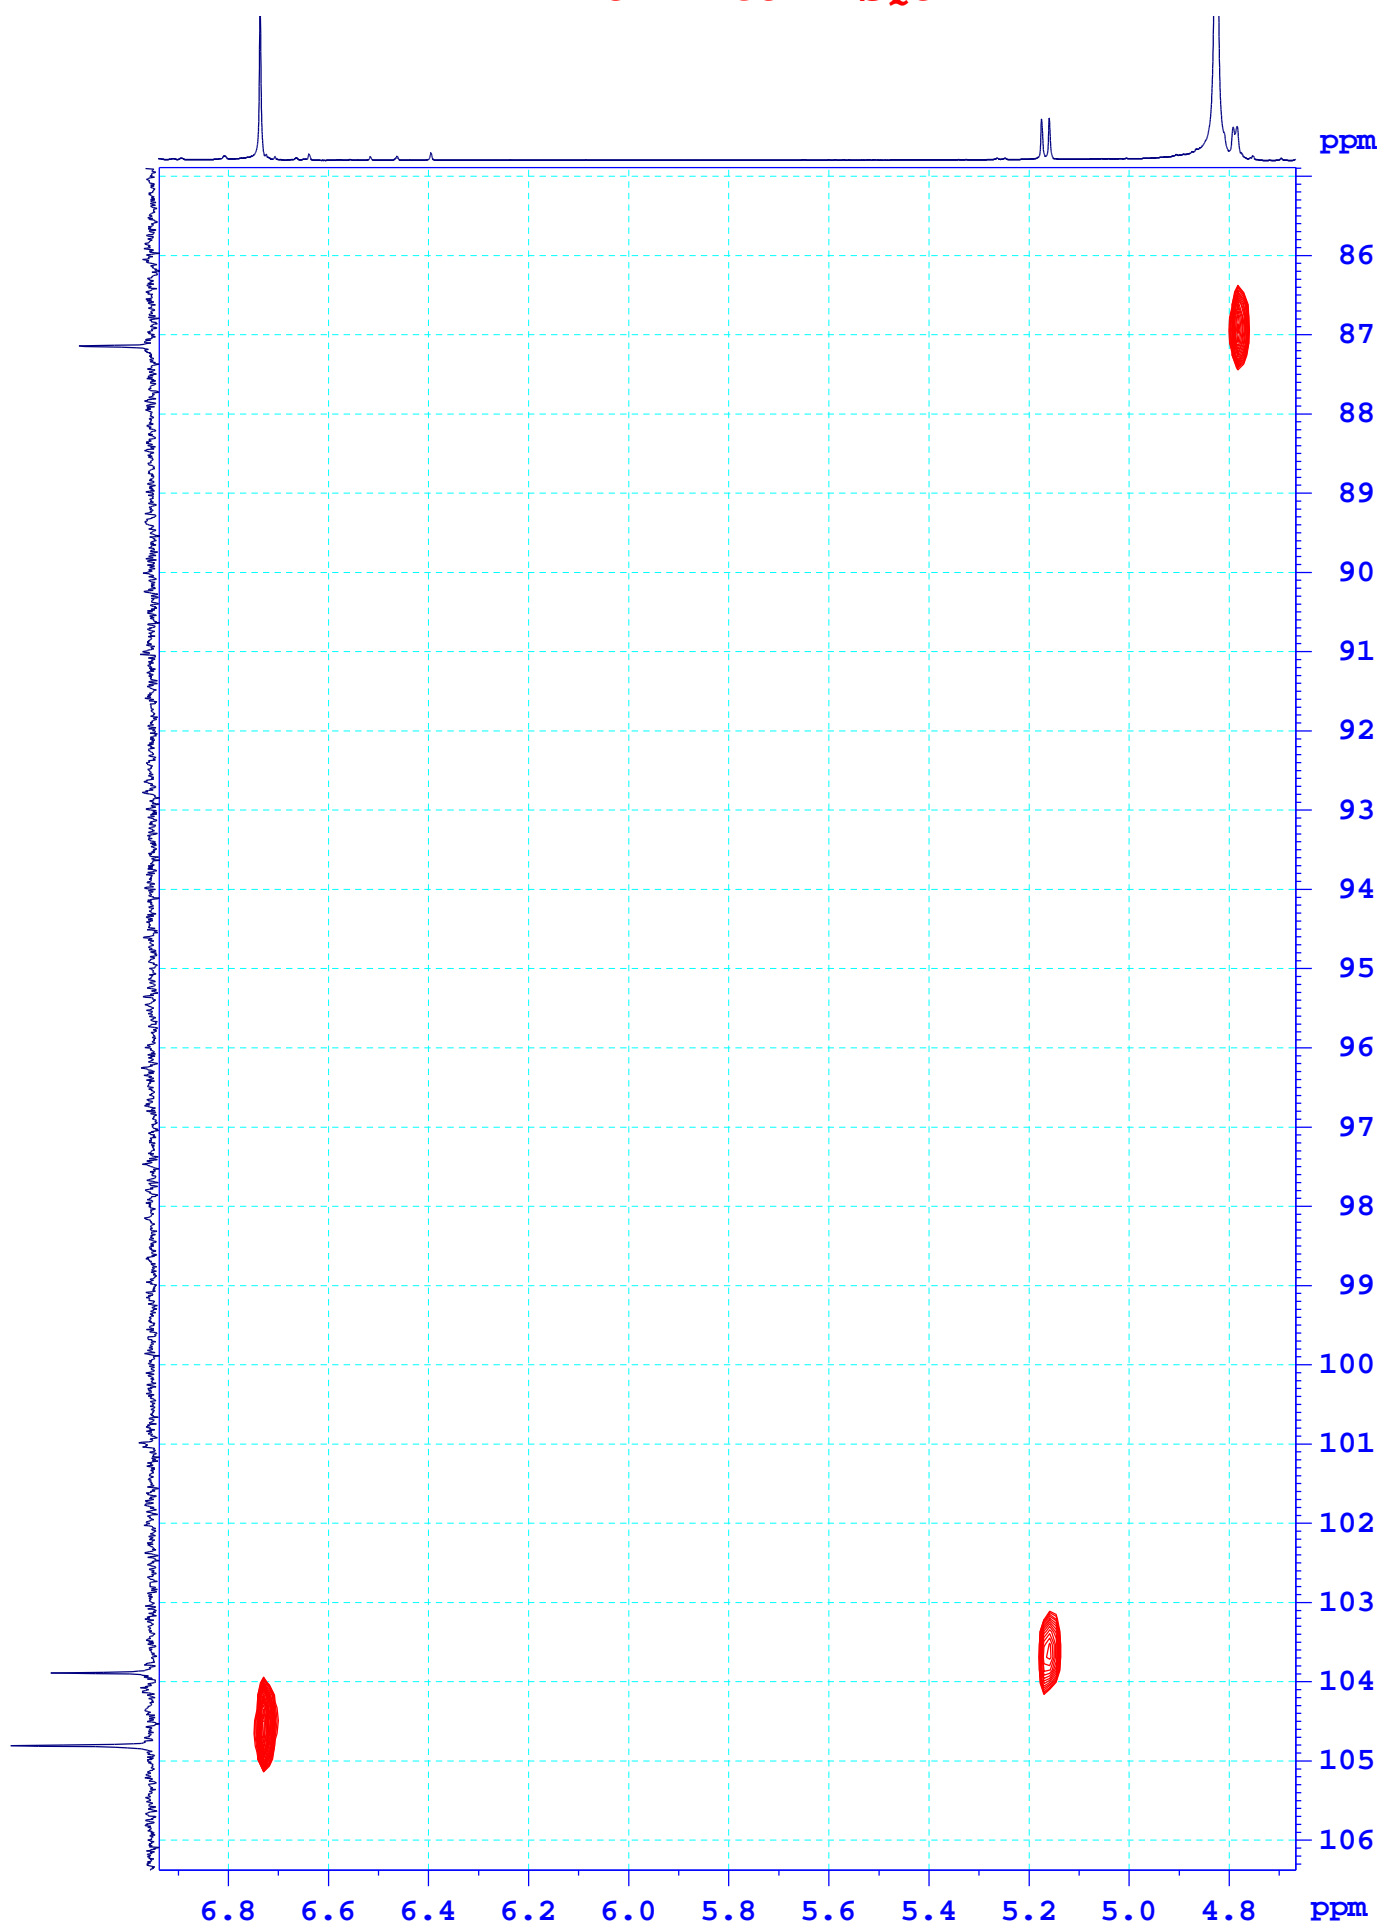

*CB4-MeOD-HSQC*

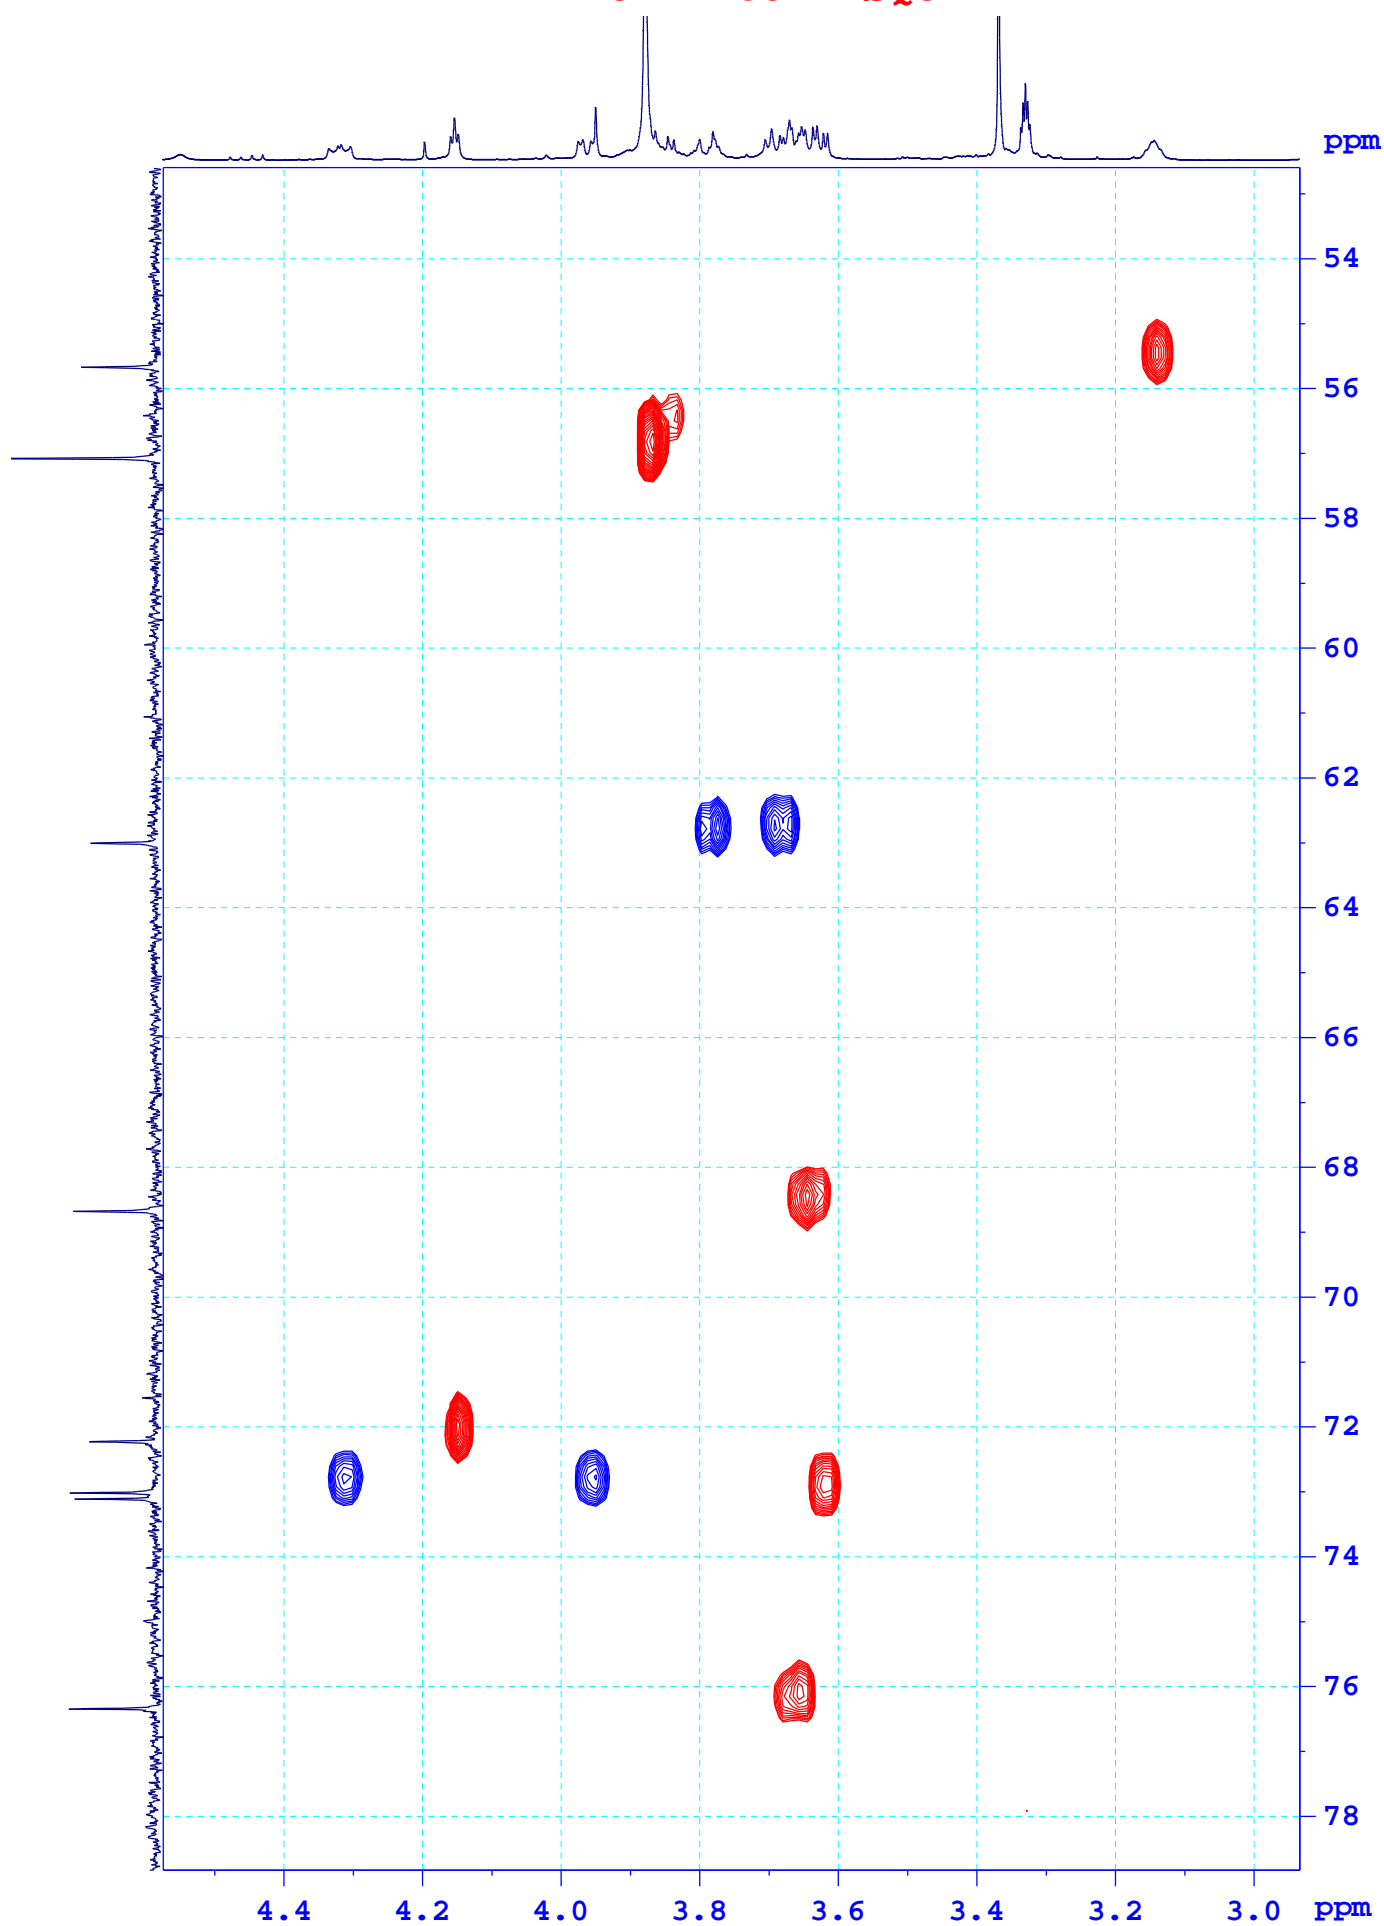

Supplement: s1 [file s1]

**CB6-MeOD-HSQC**

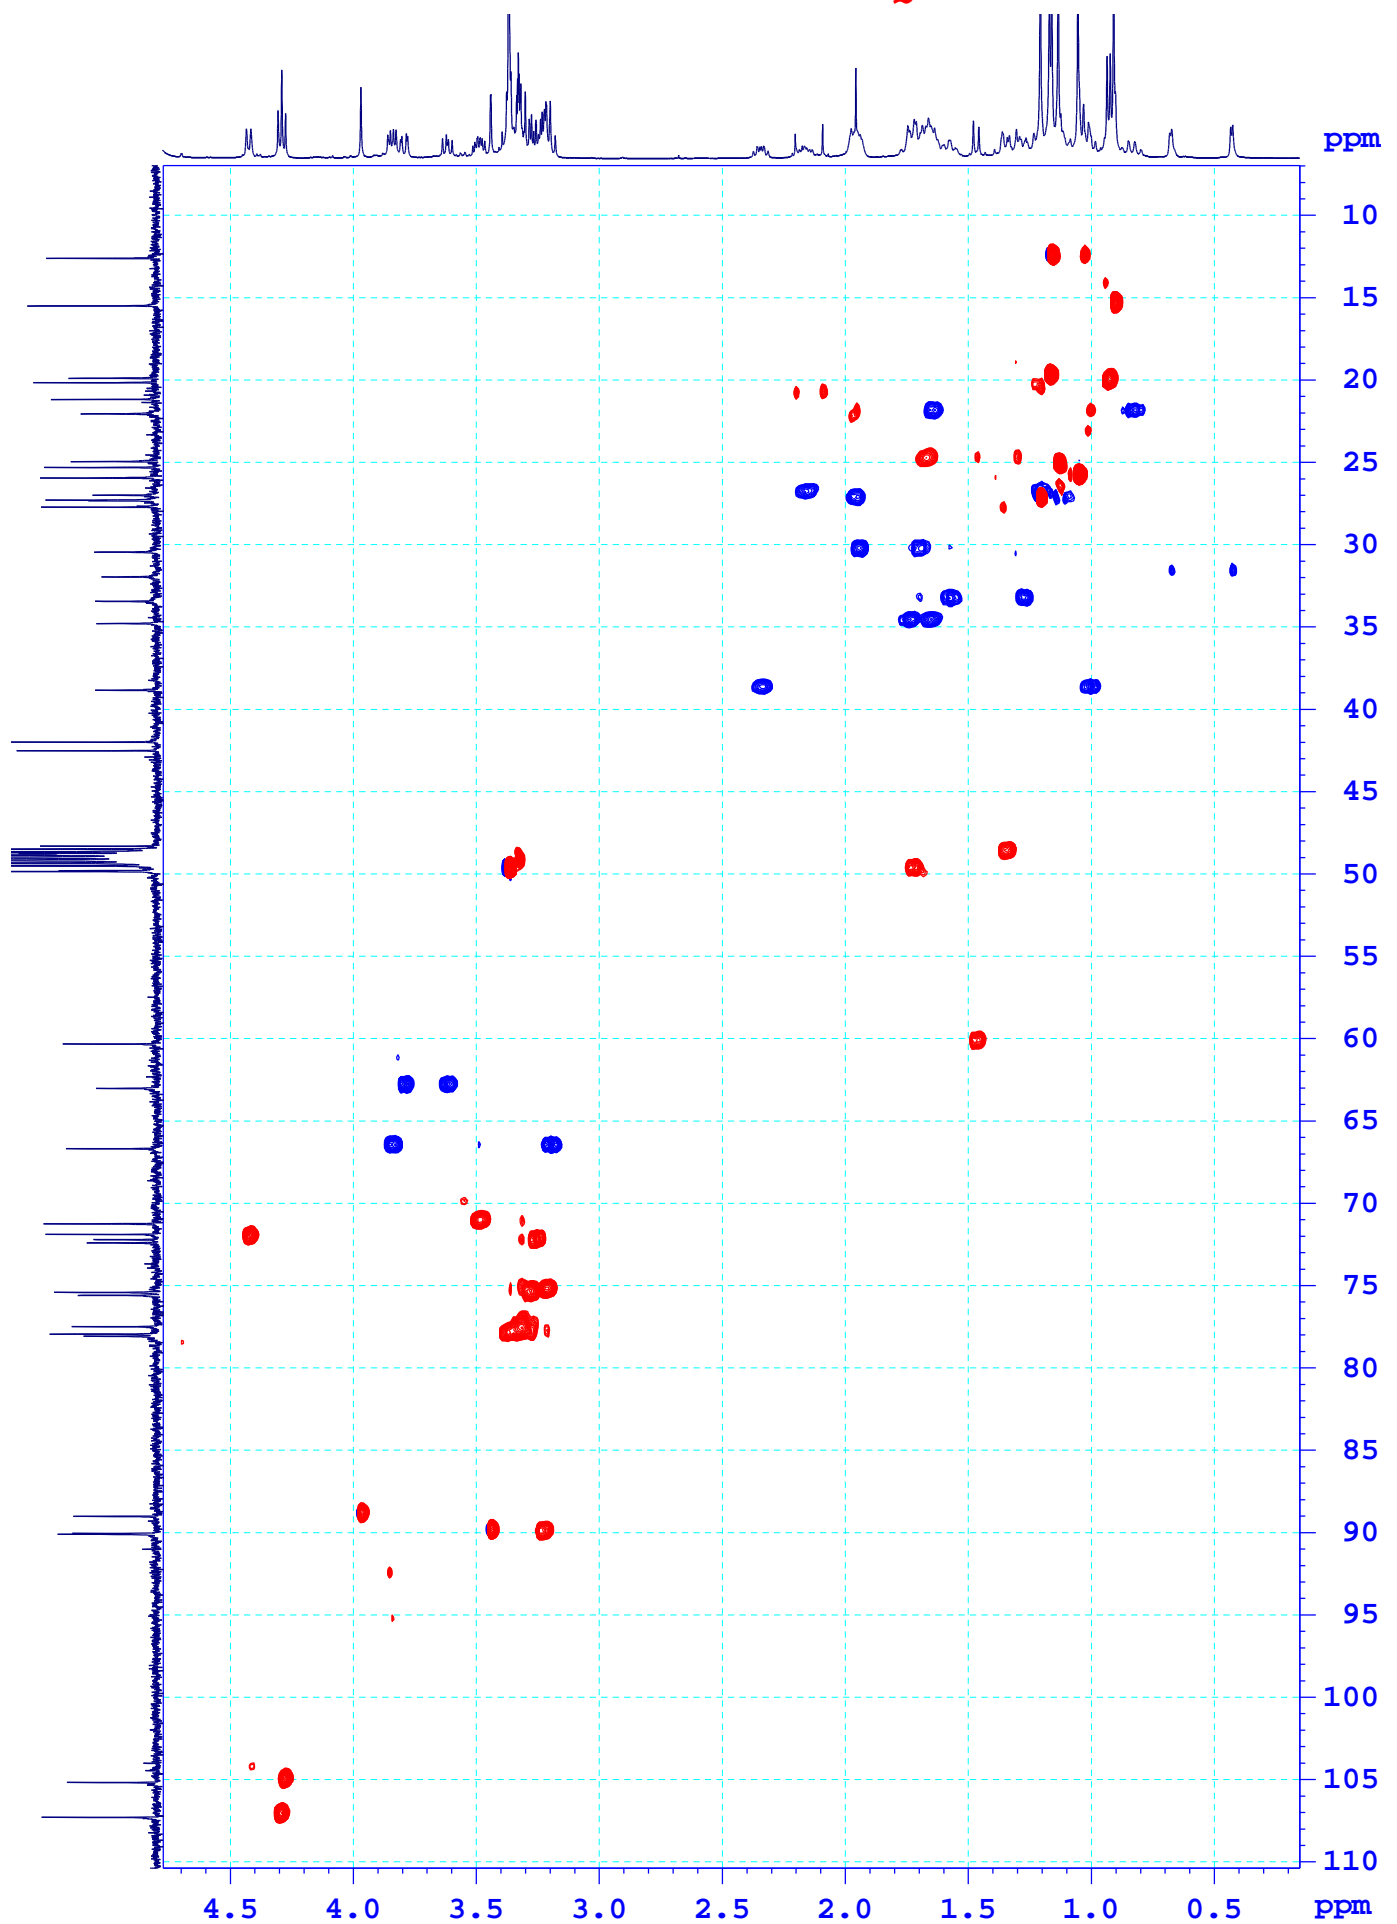

*CB6-MeOD-HSQC*

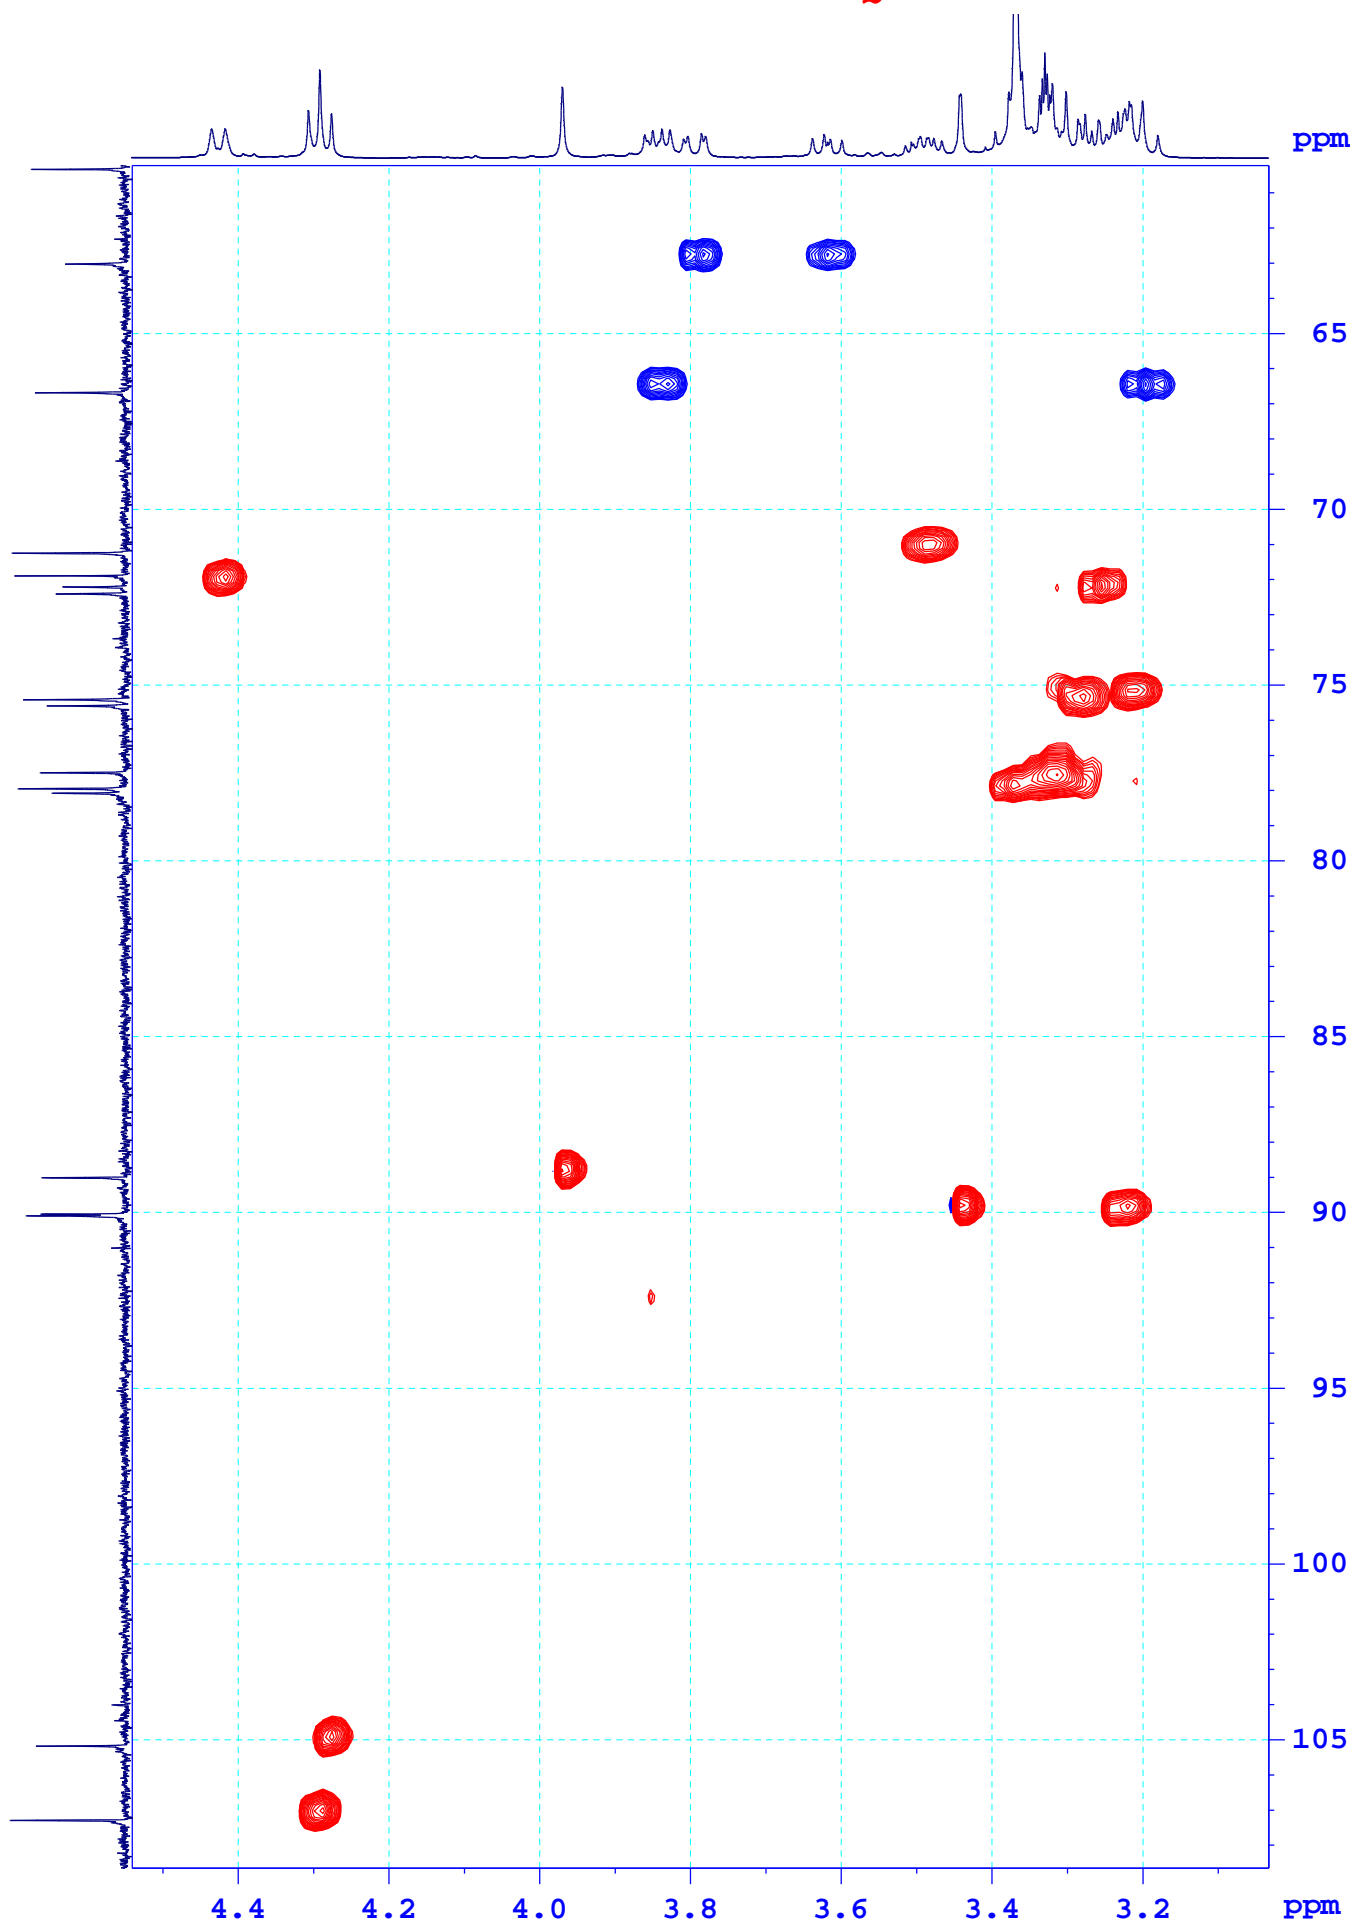

**CB6-MeOD-HSQC**

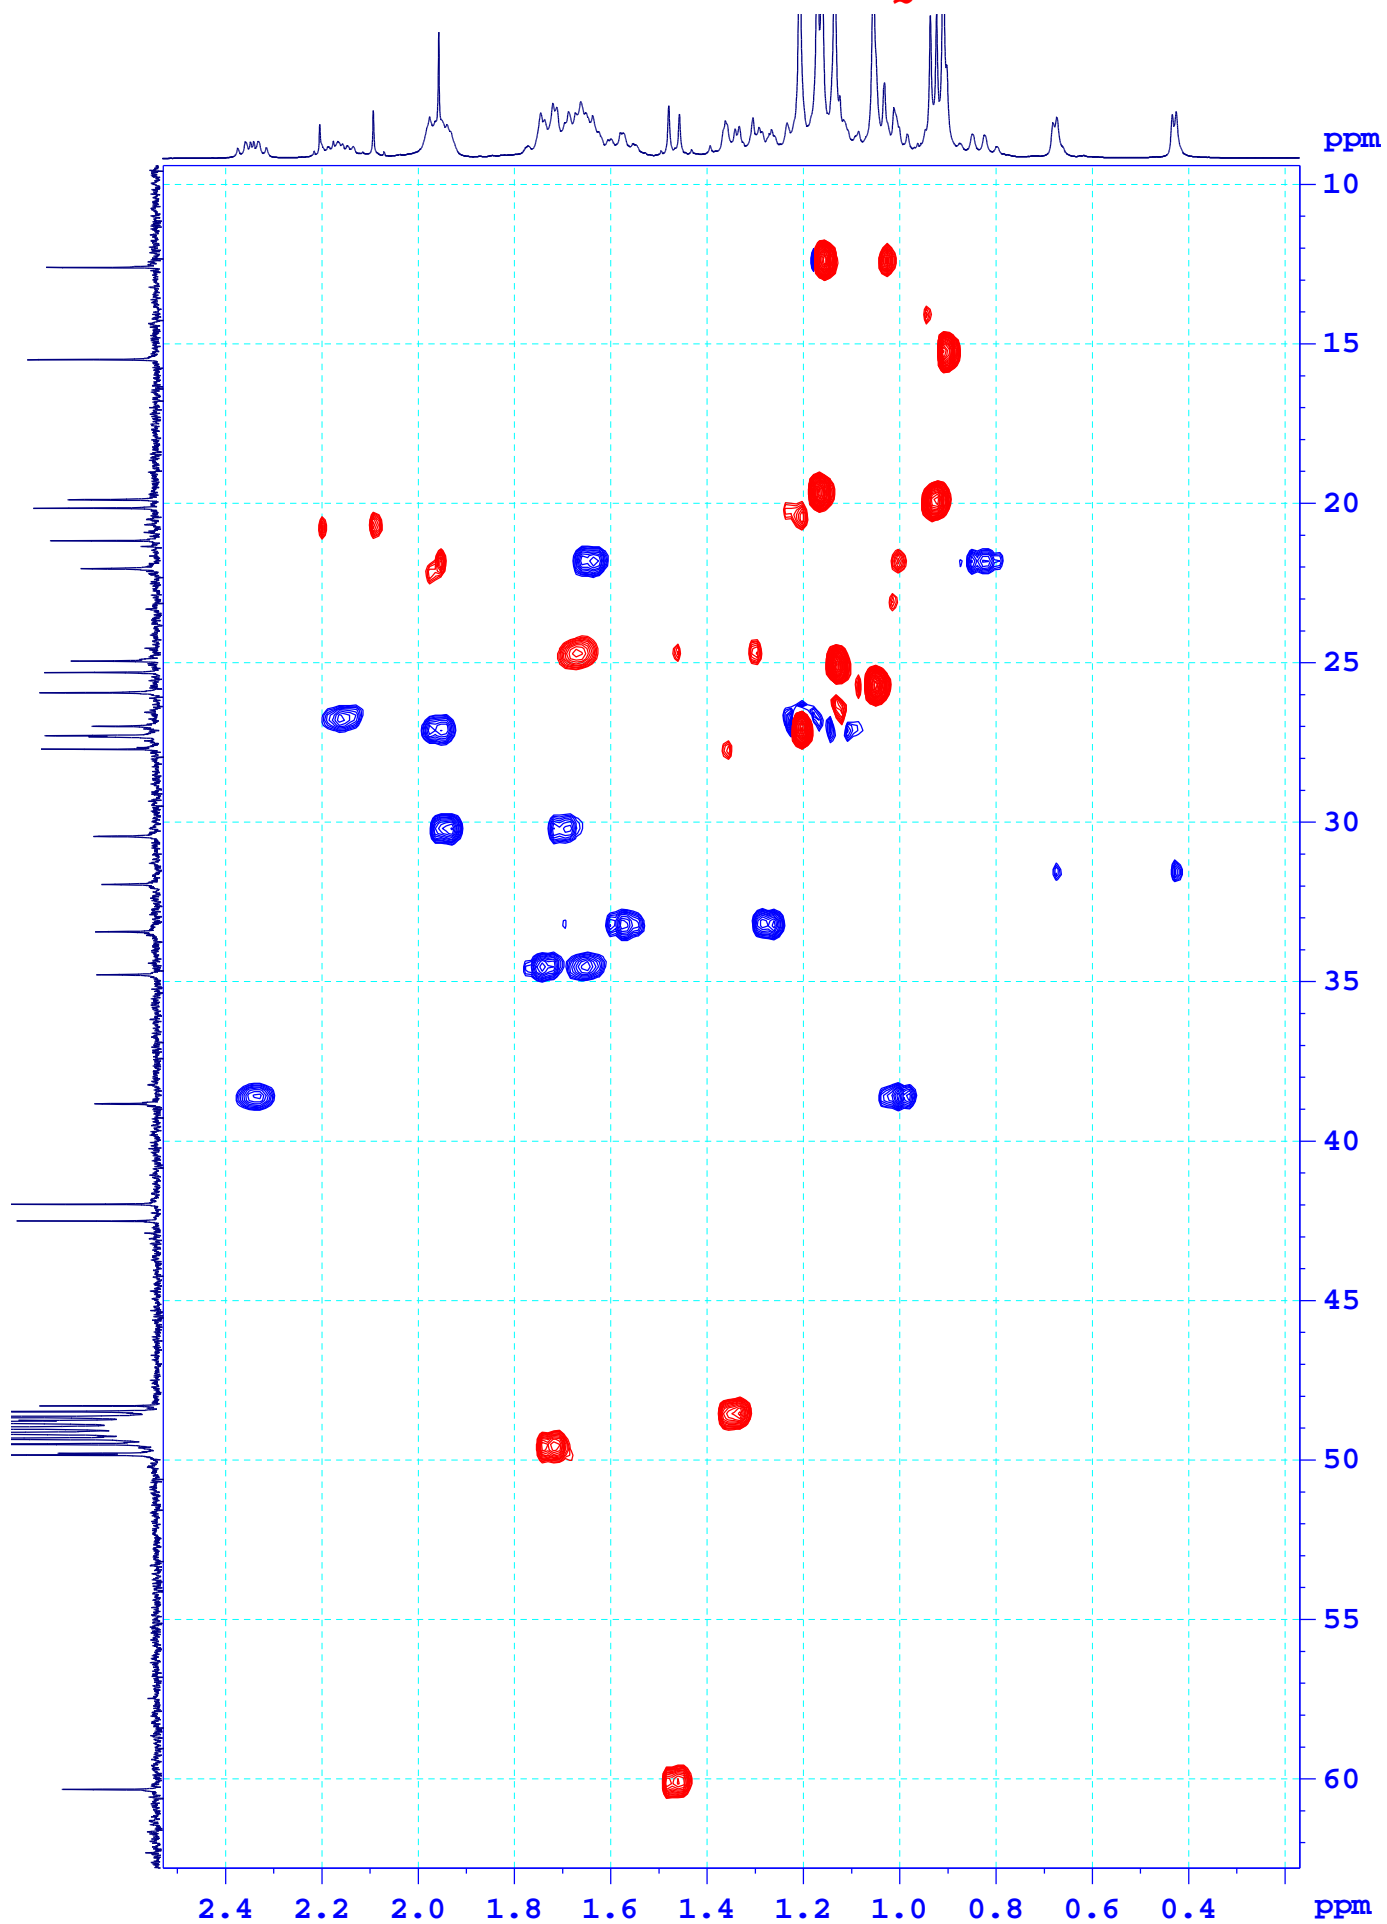

Supplement: s1 [file s1]

*CB6-MeOD-HMBC*

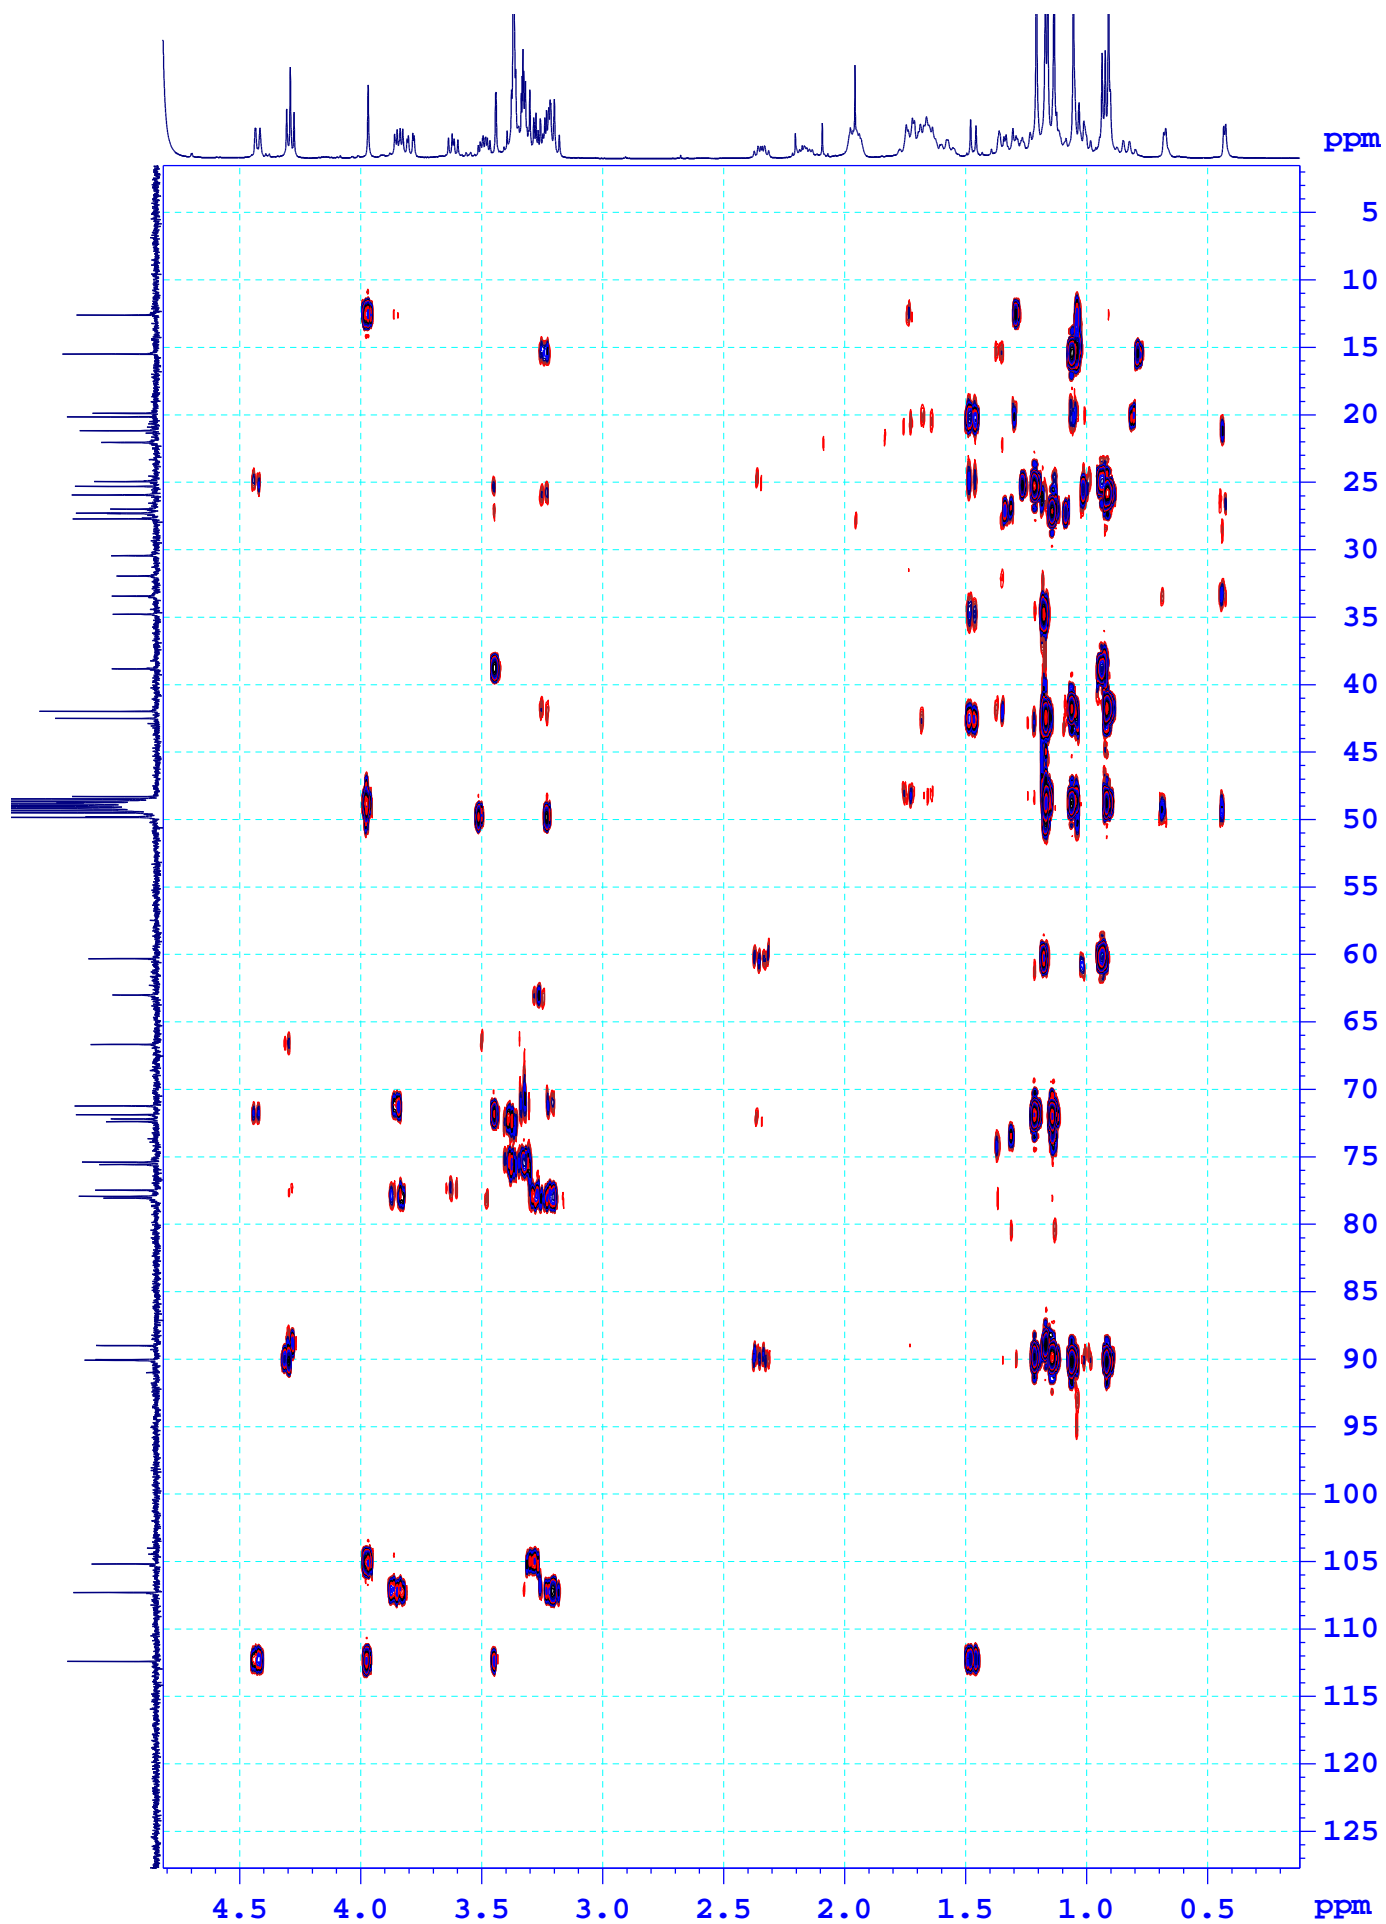

*CB6-MeOD-HMBC*

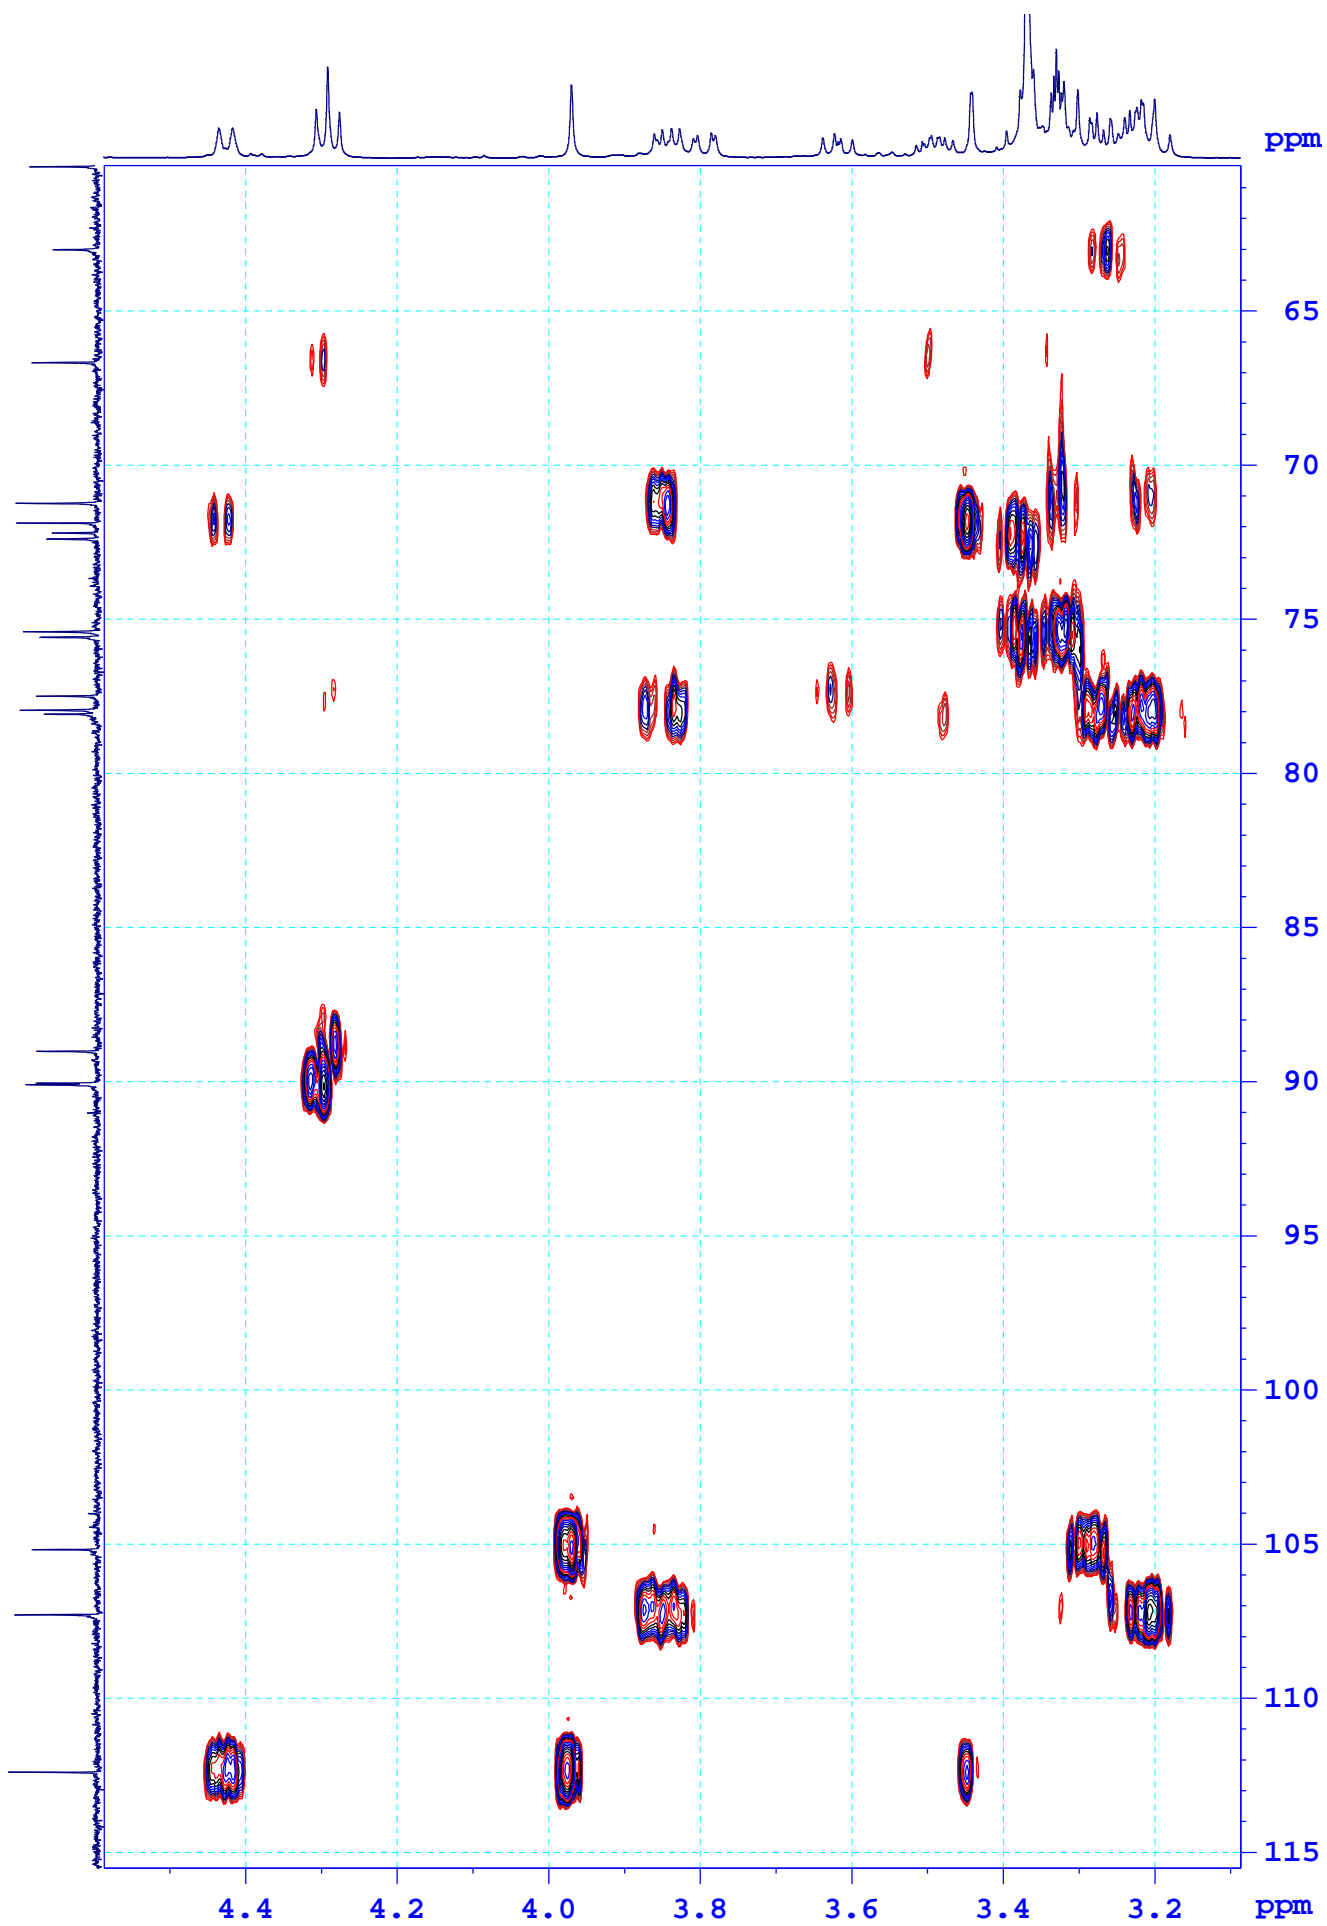

*CB6-MeOD-HMBC*

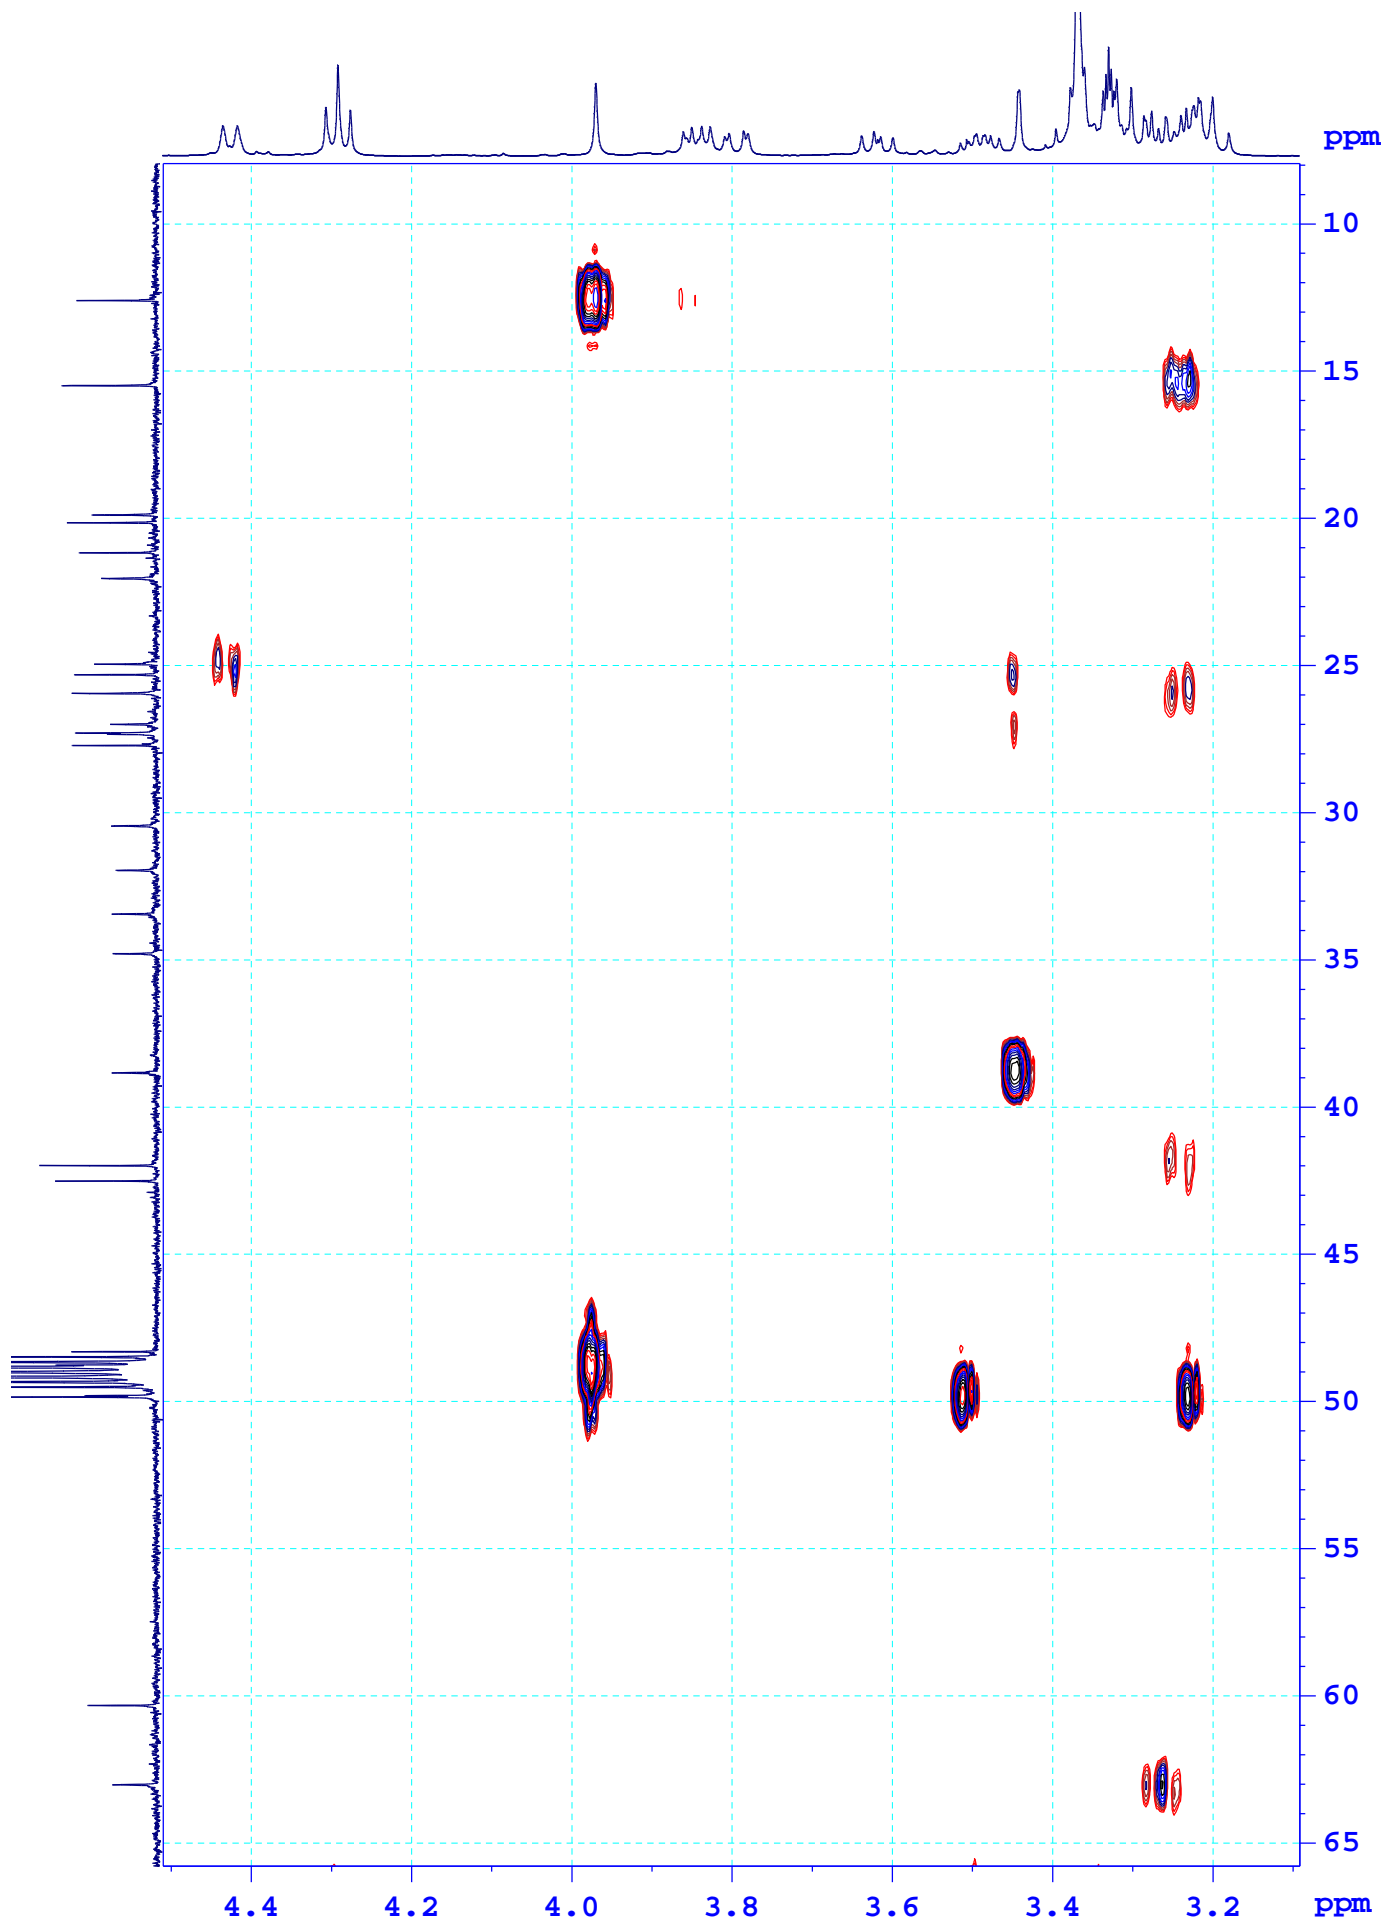

*CB6-MeOD-HMBC*

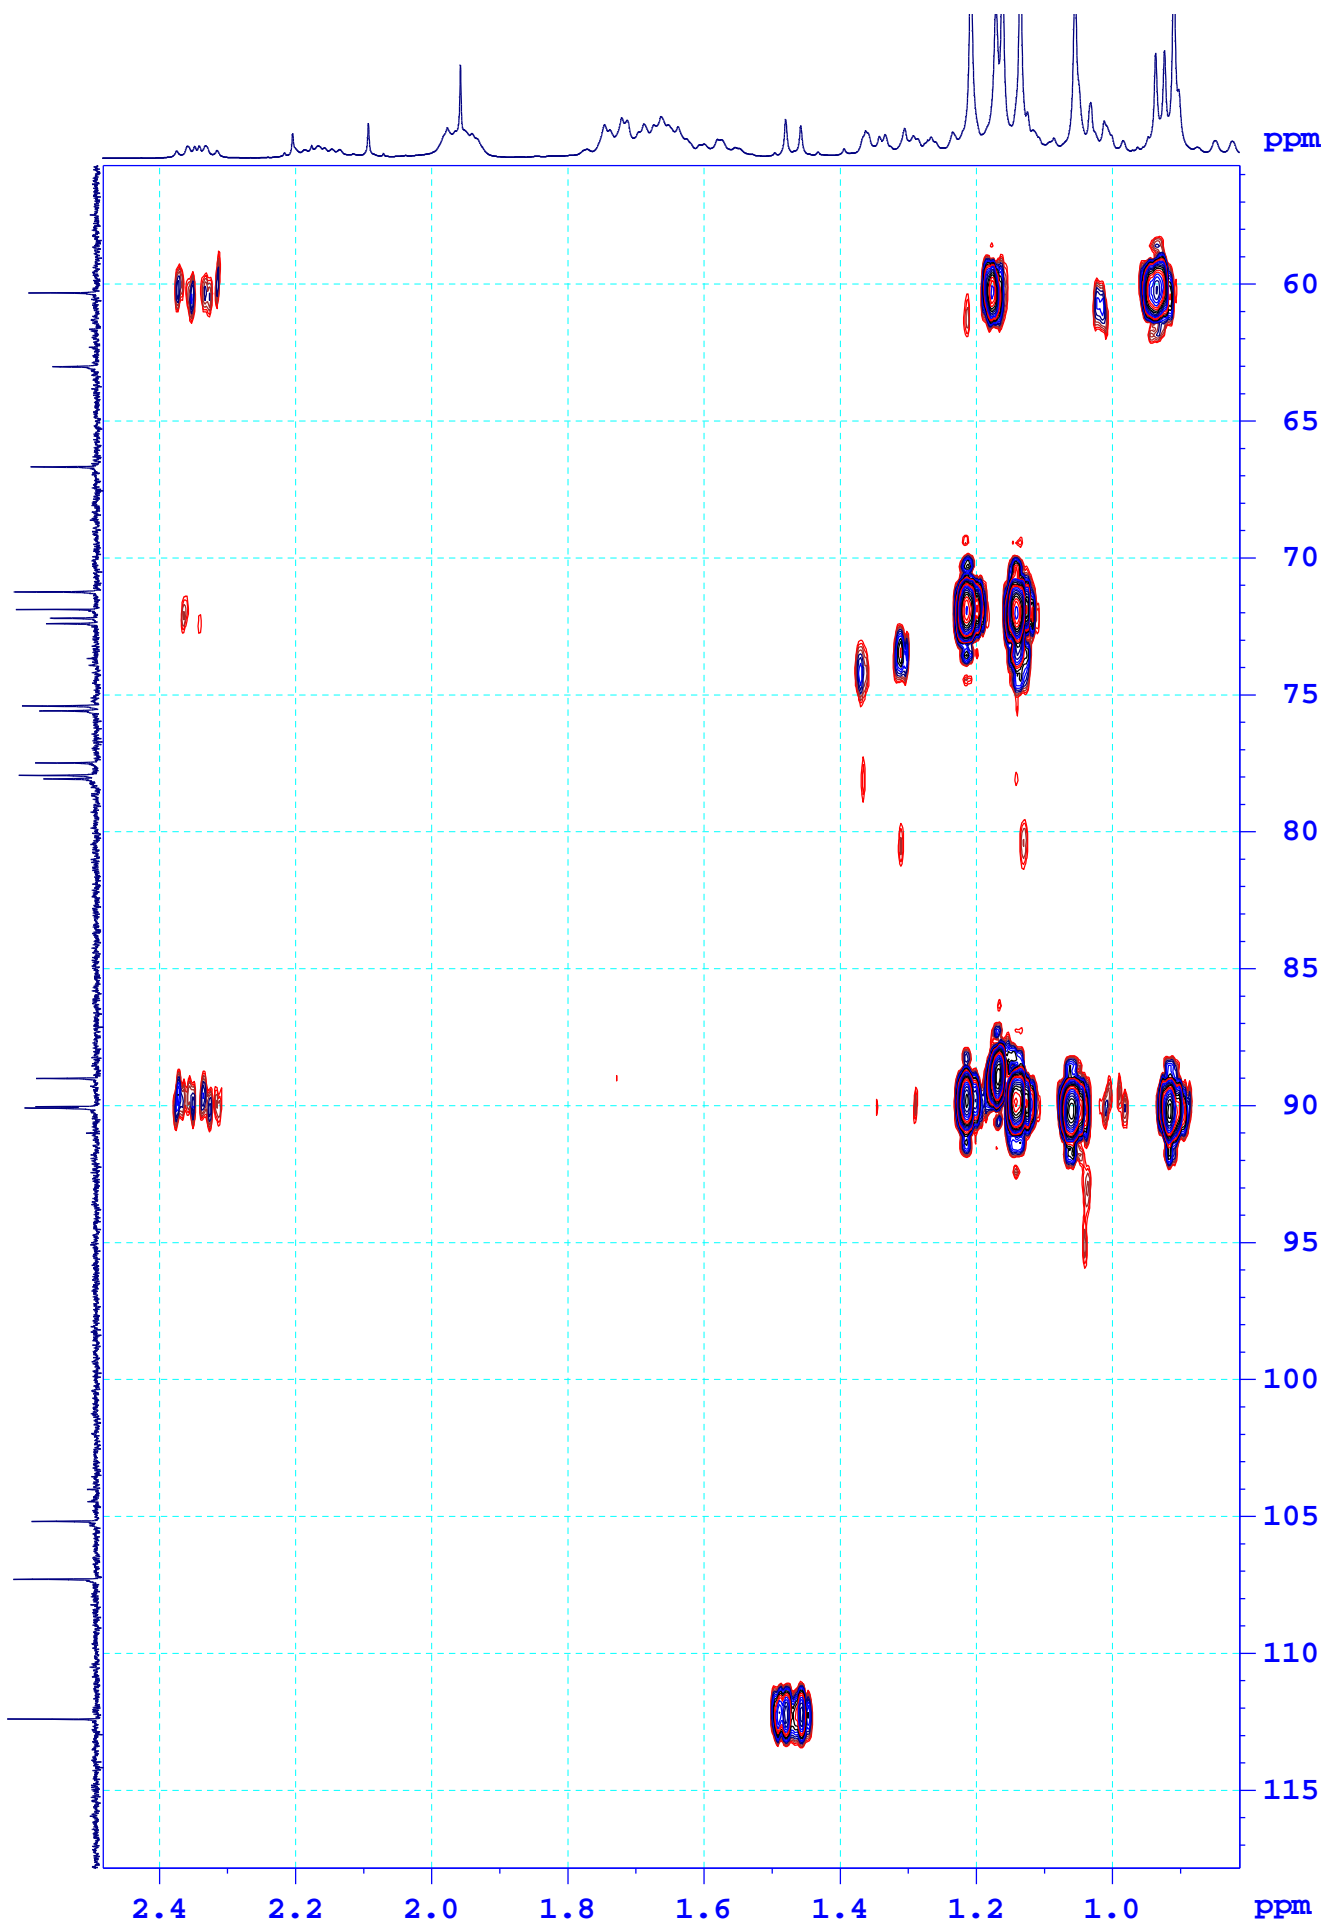

*CB6-MeOD-HMBC*

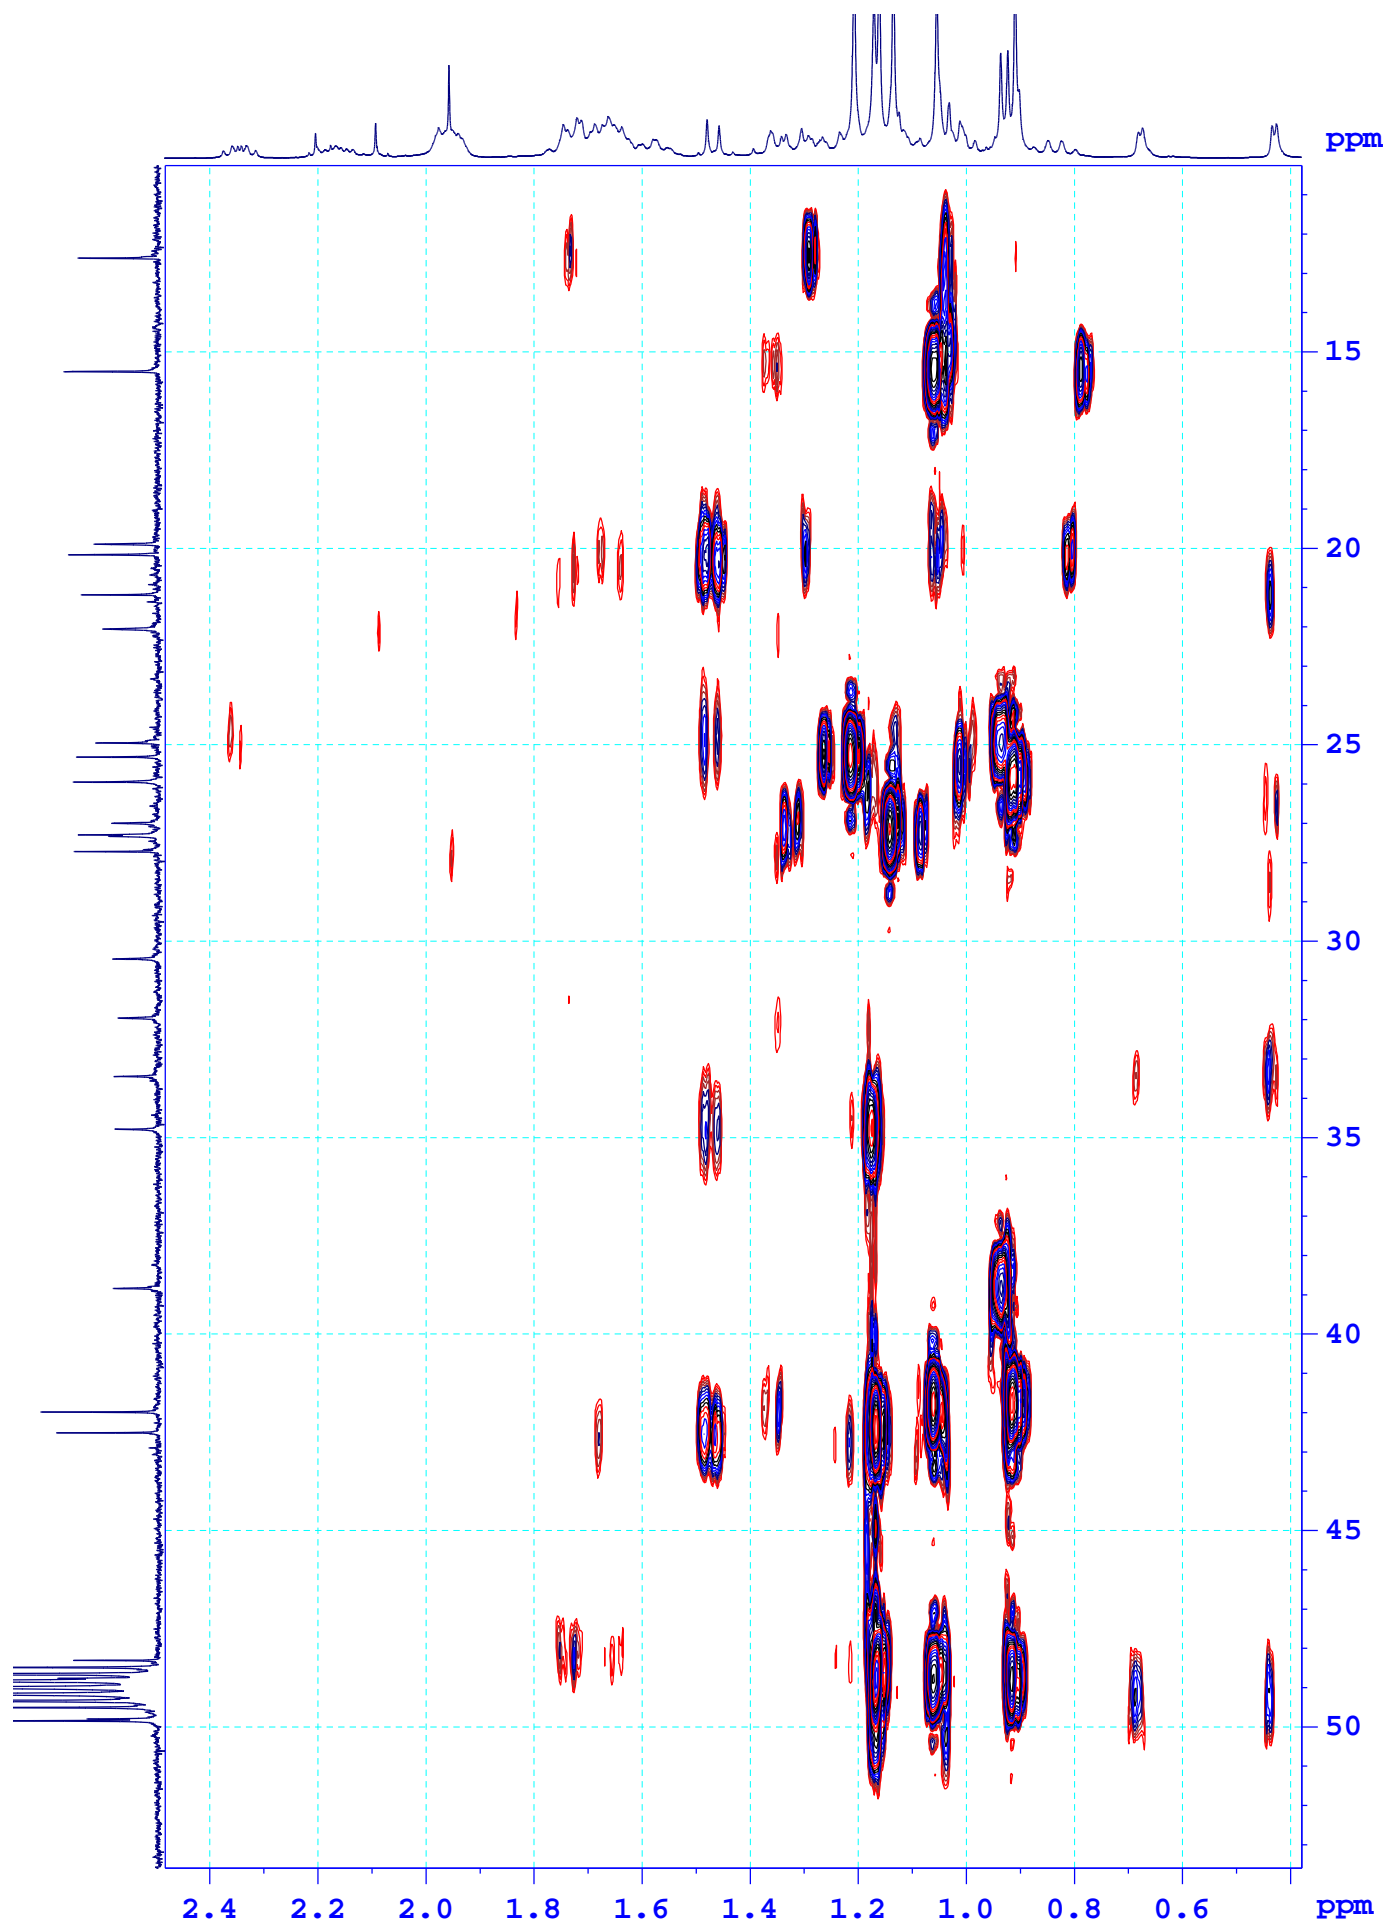

*CB6-MeOD-HMBC*

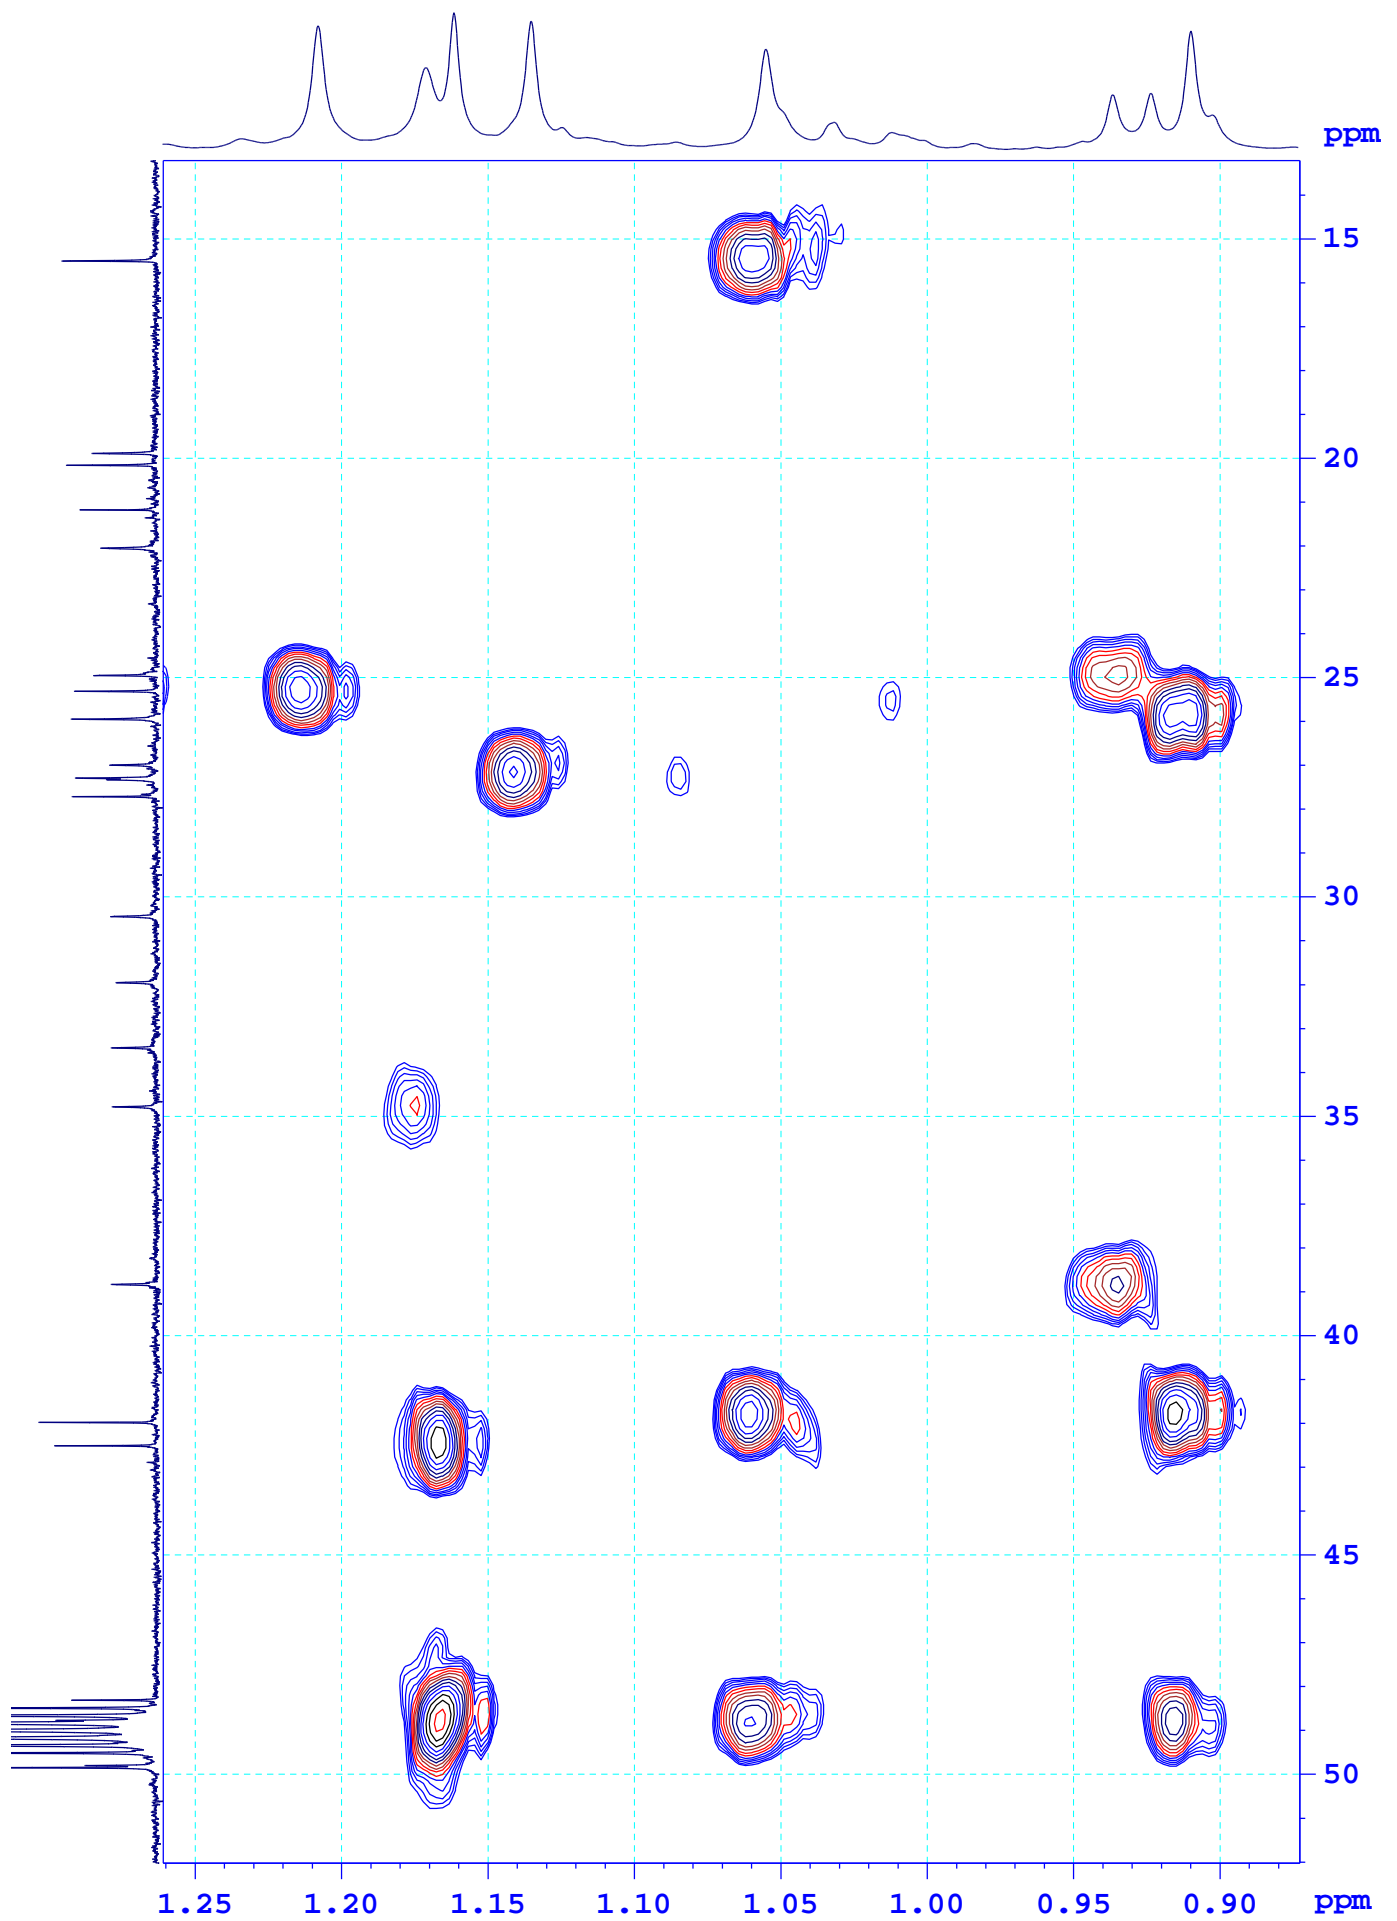

Supplement: s1 [file s1]

*CB4-MeOD-HMBC*

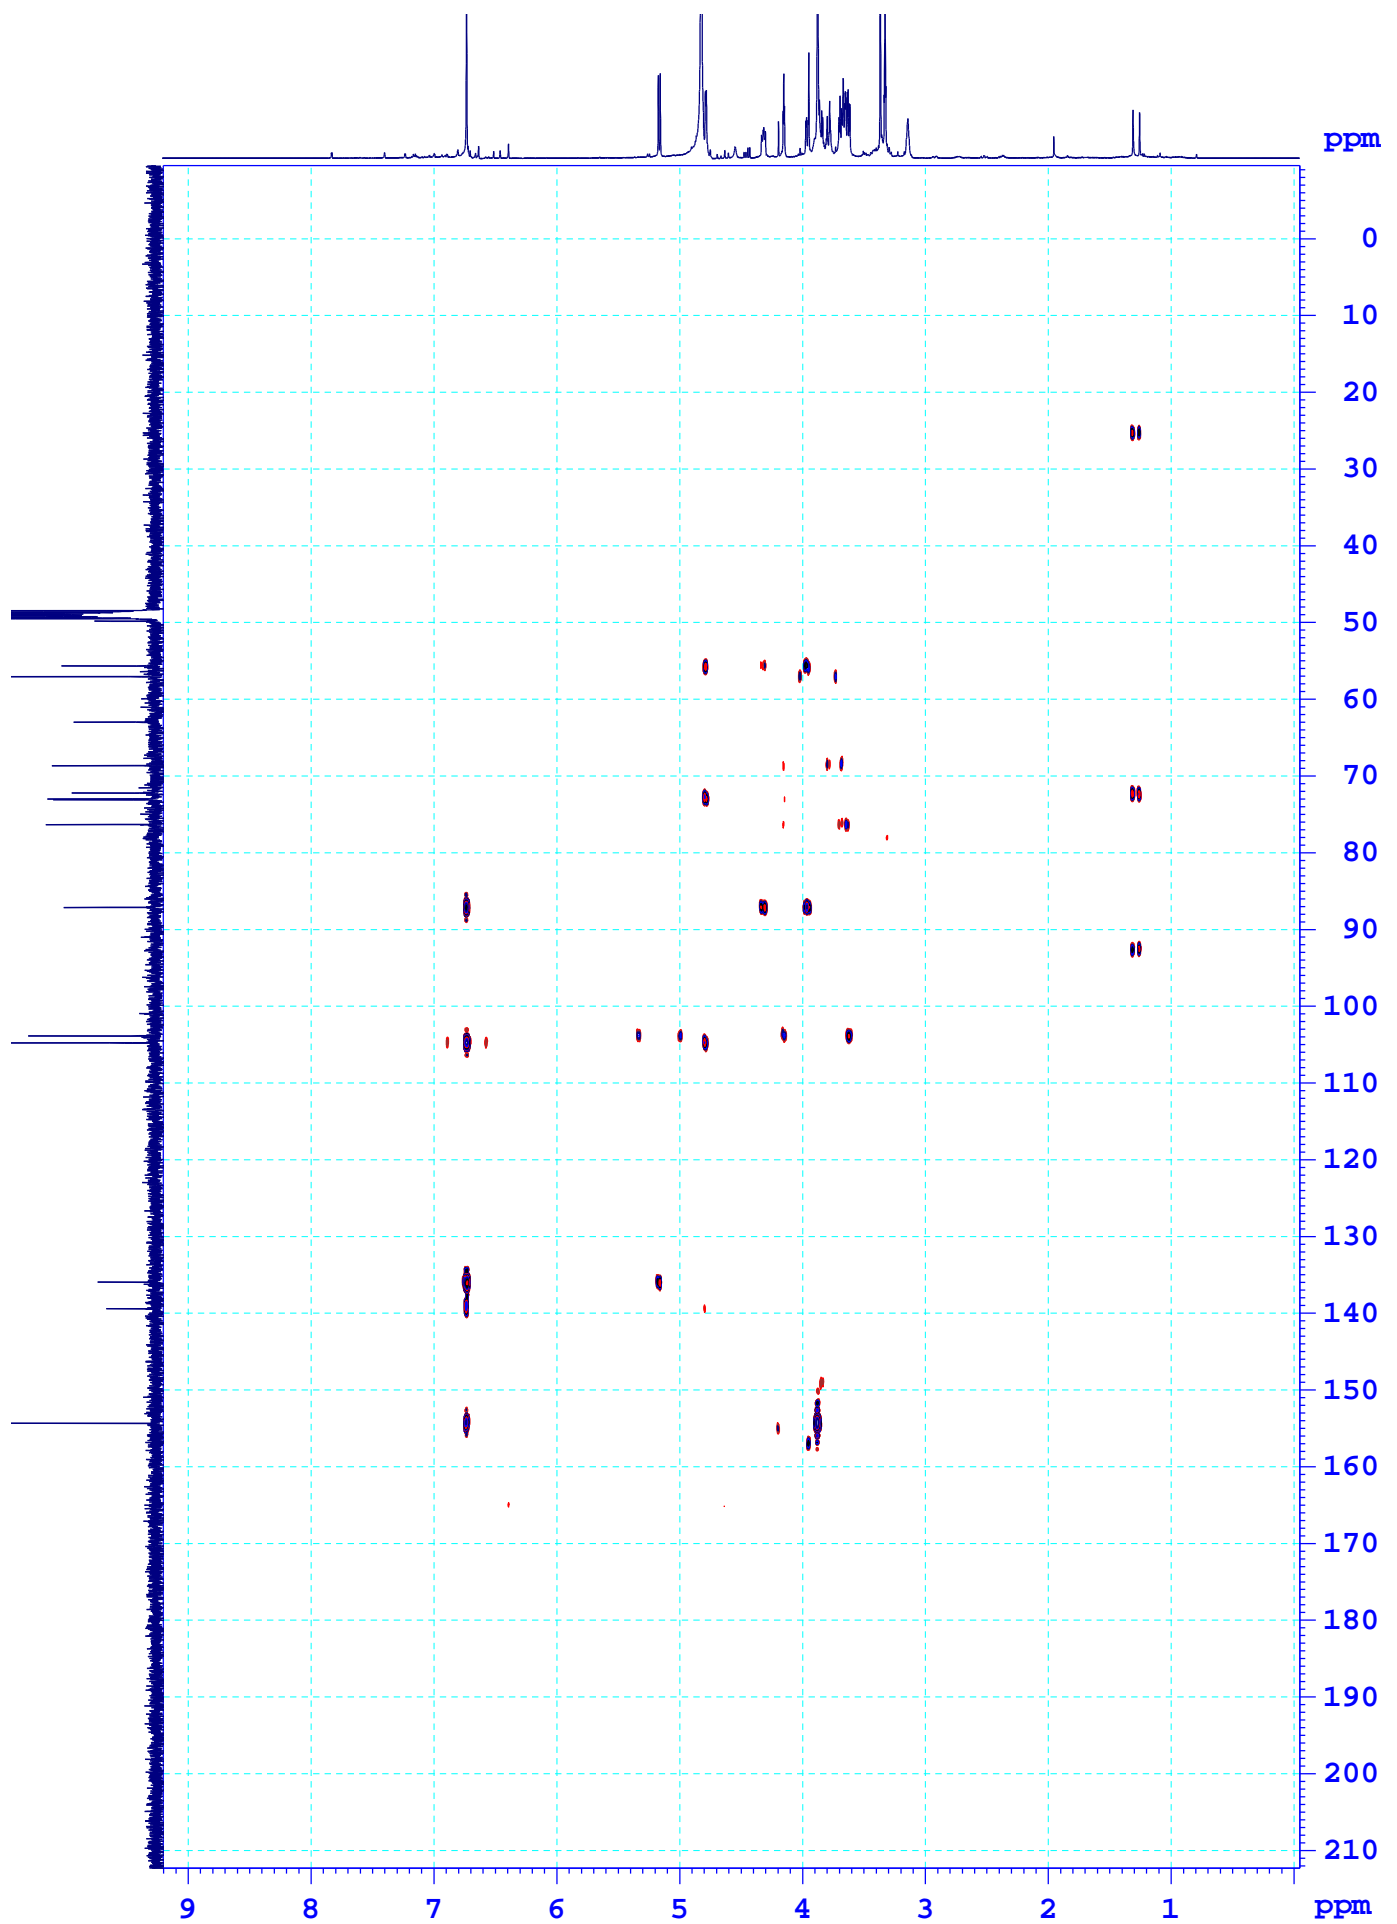

*CB4-MeOD-HMBC*

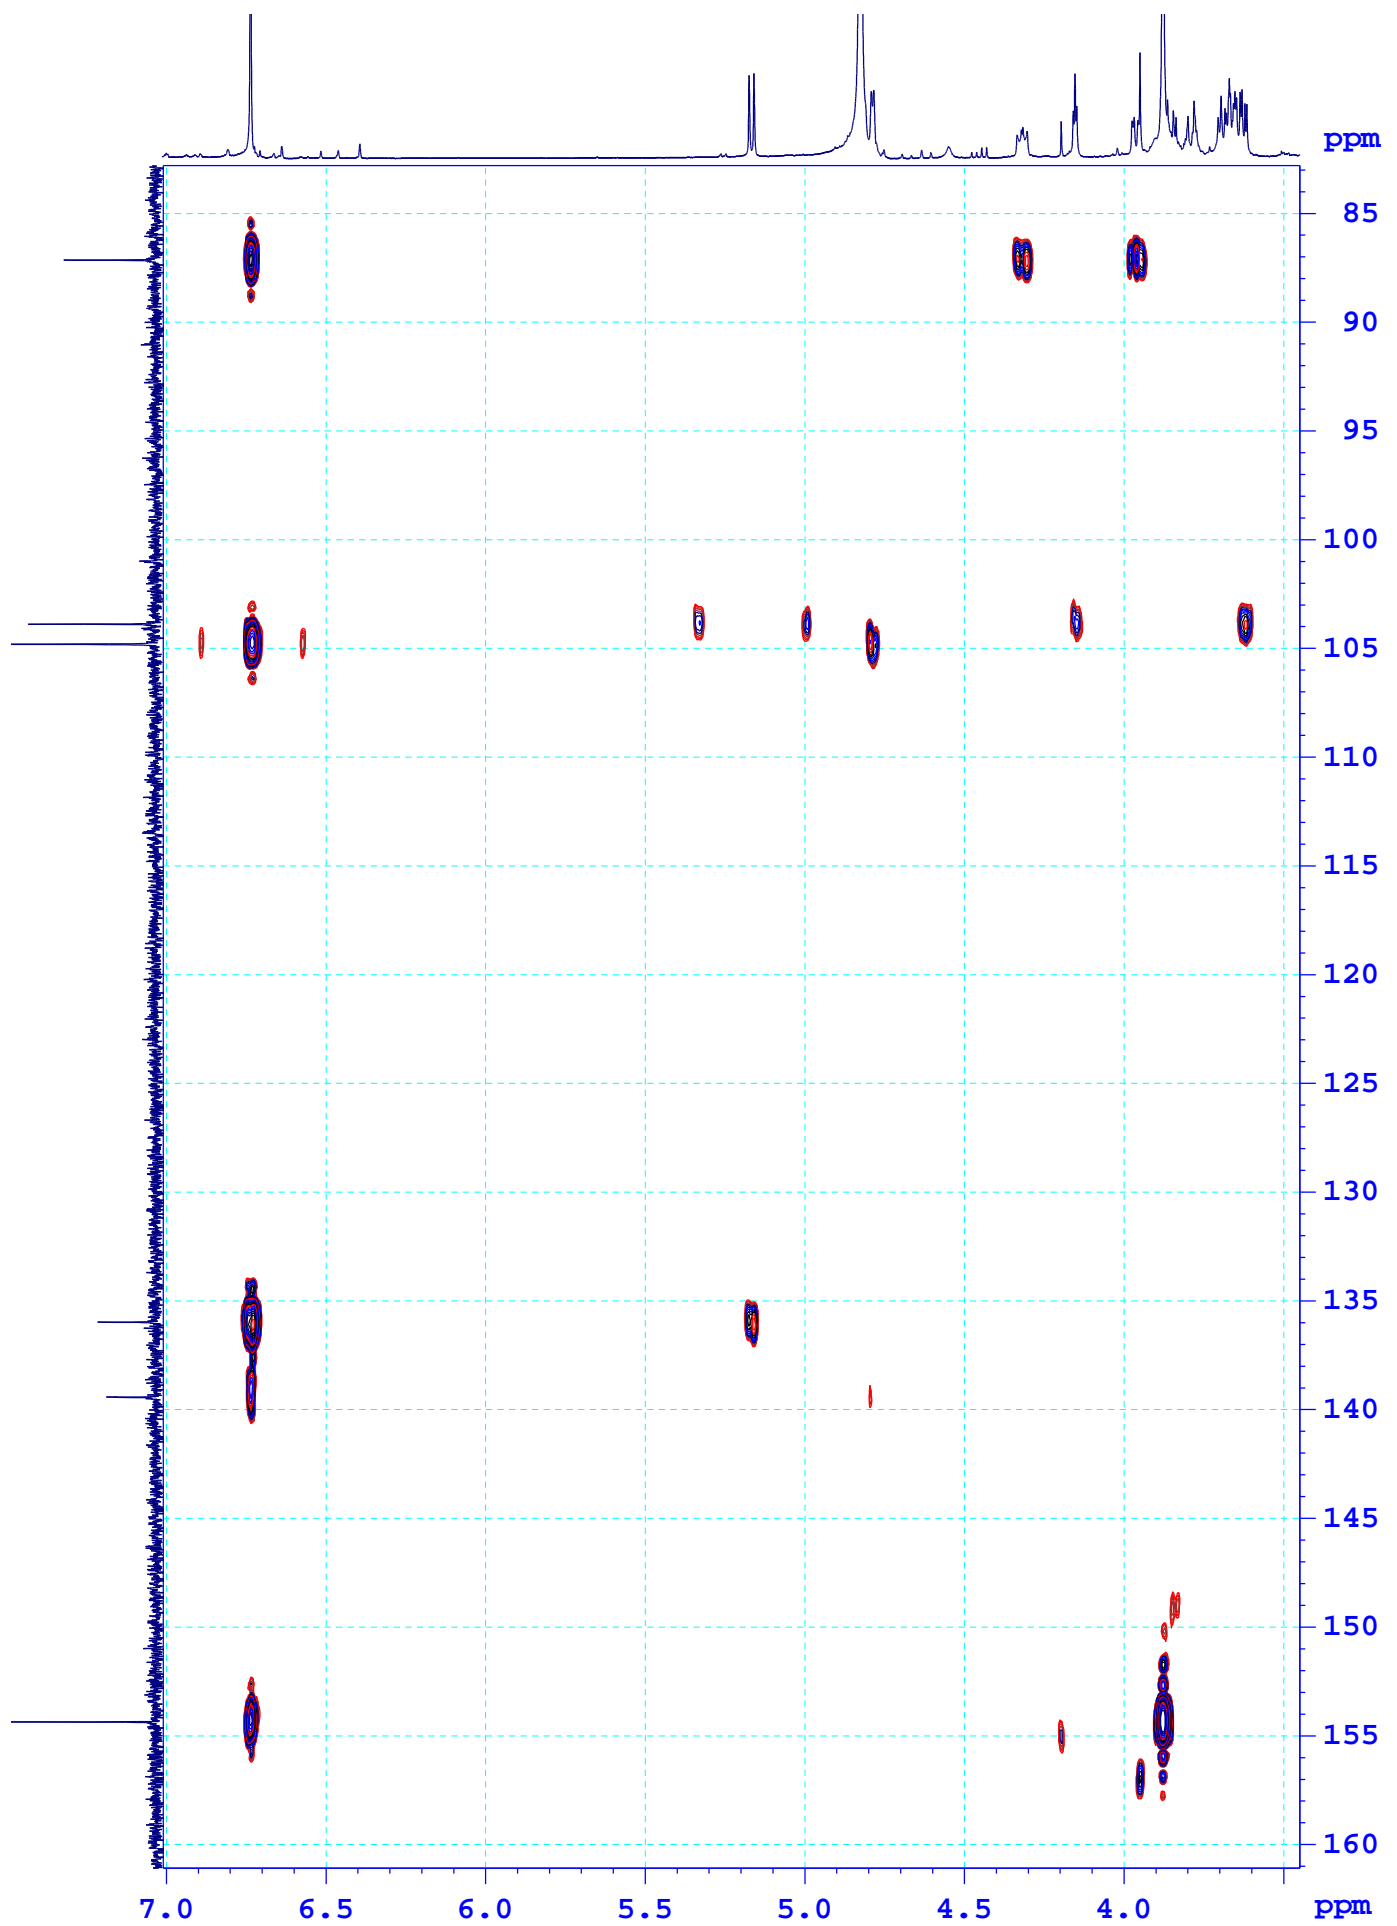

*CB4-MeOD-HMBC*

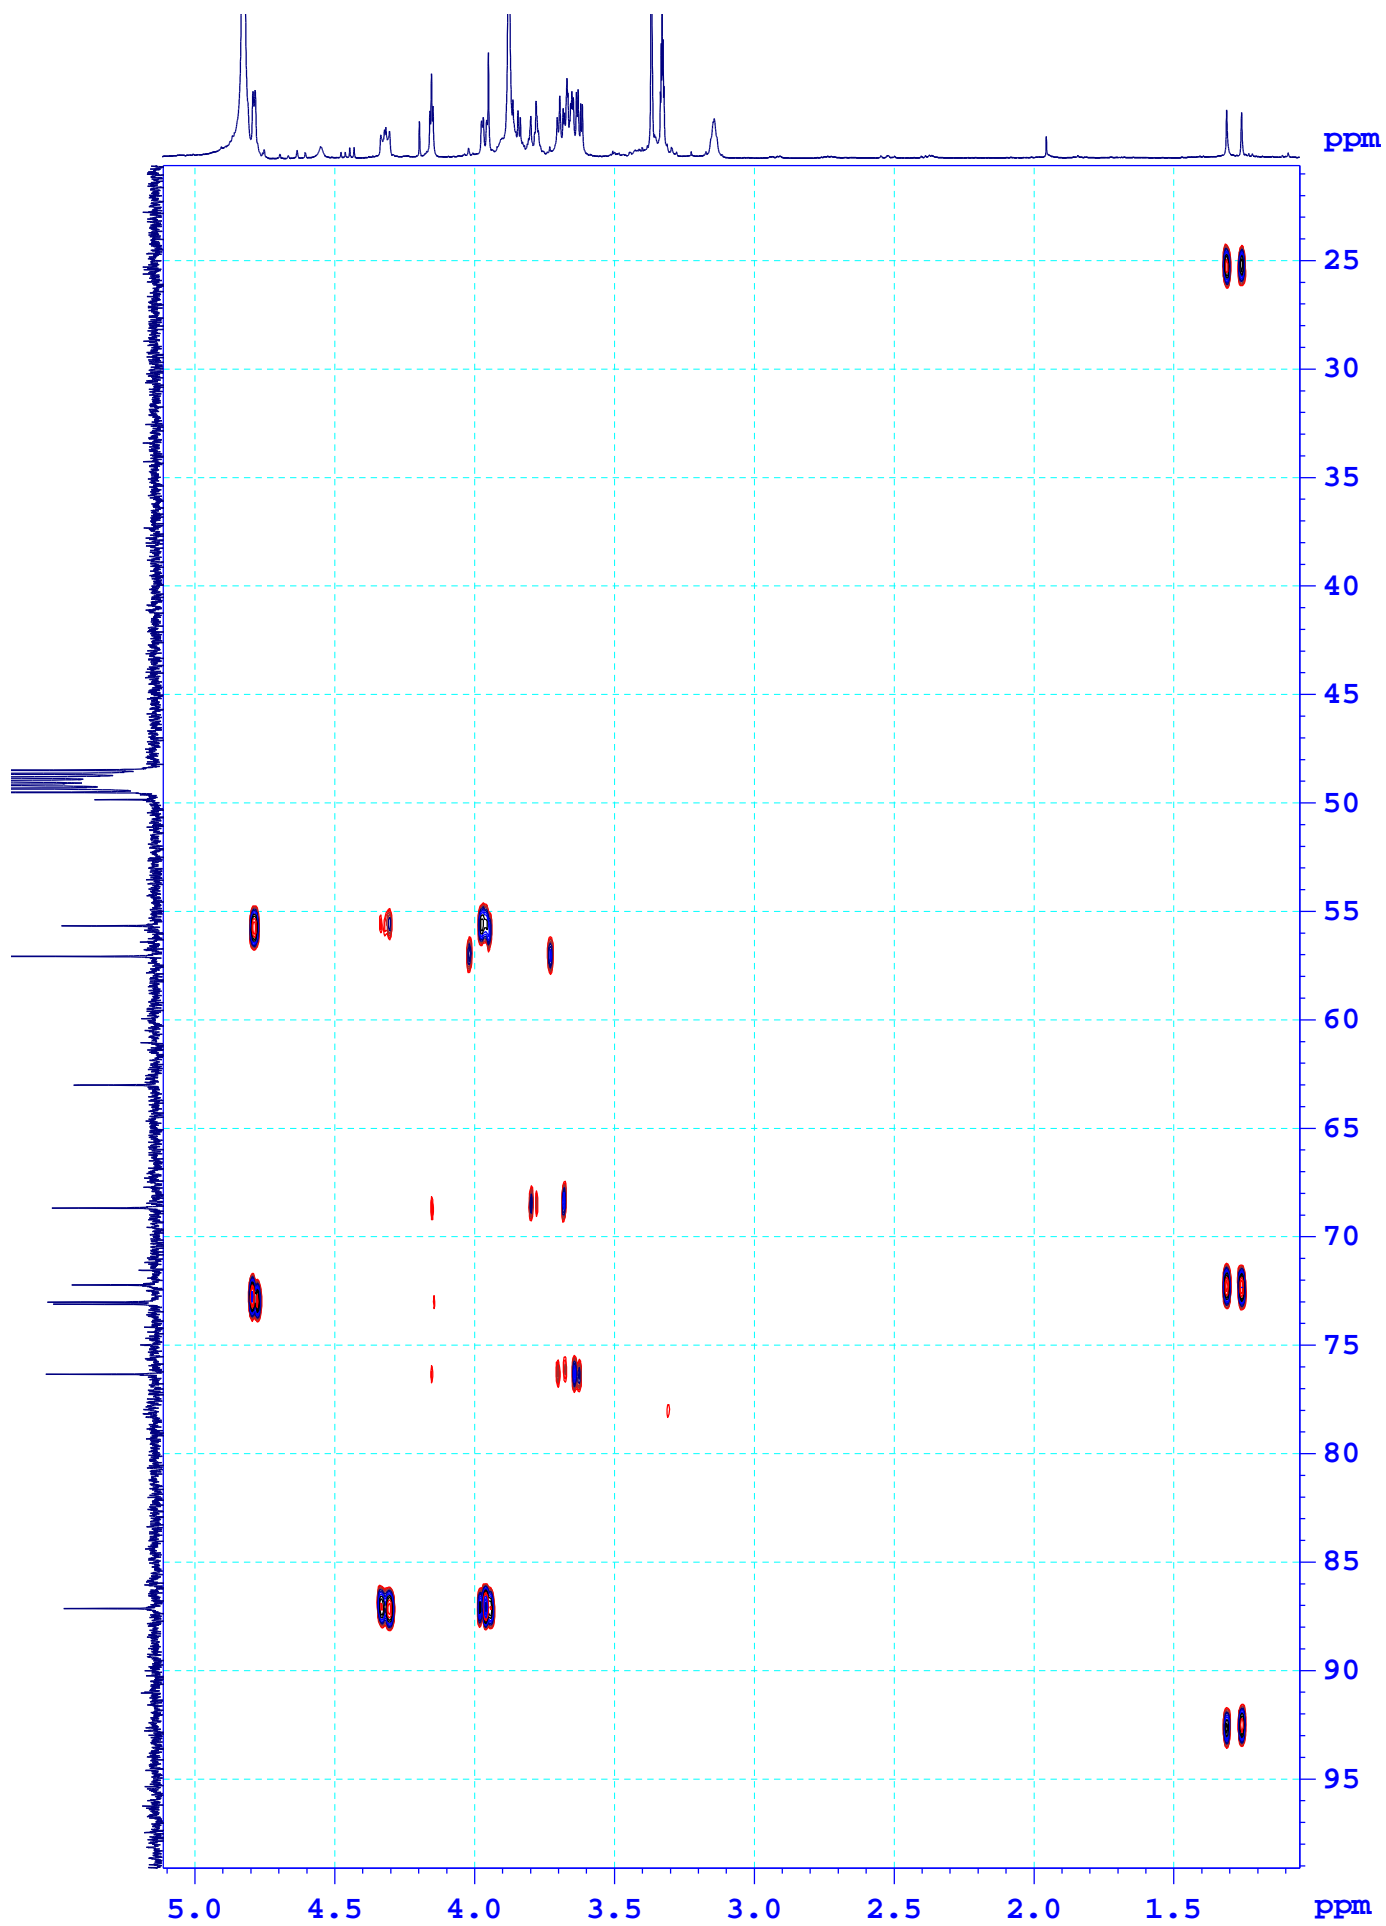

*CB4-MeOD-HMBC*

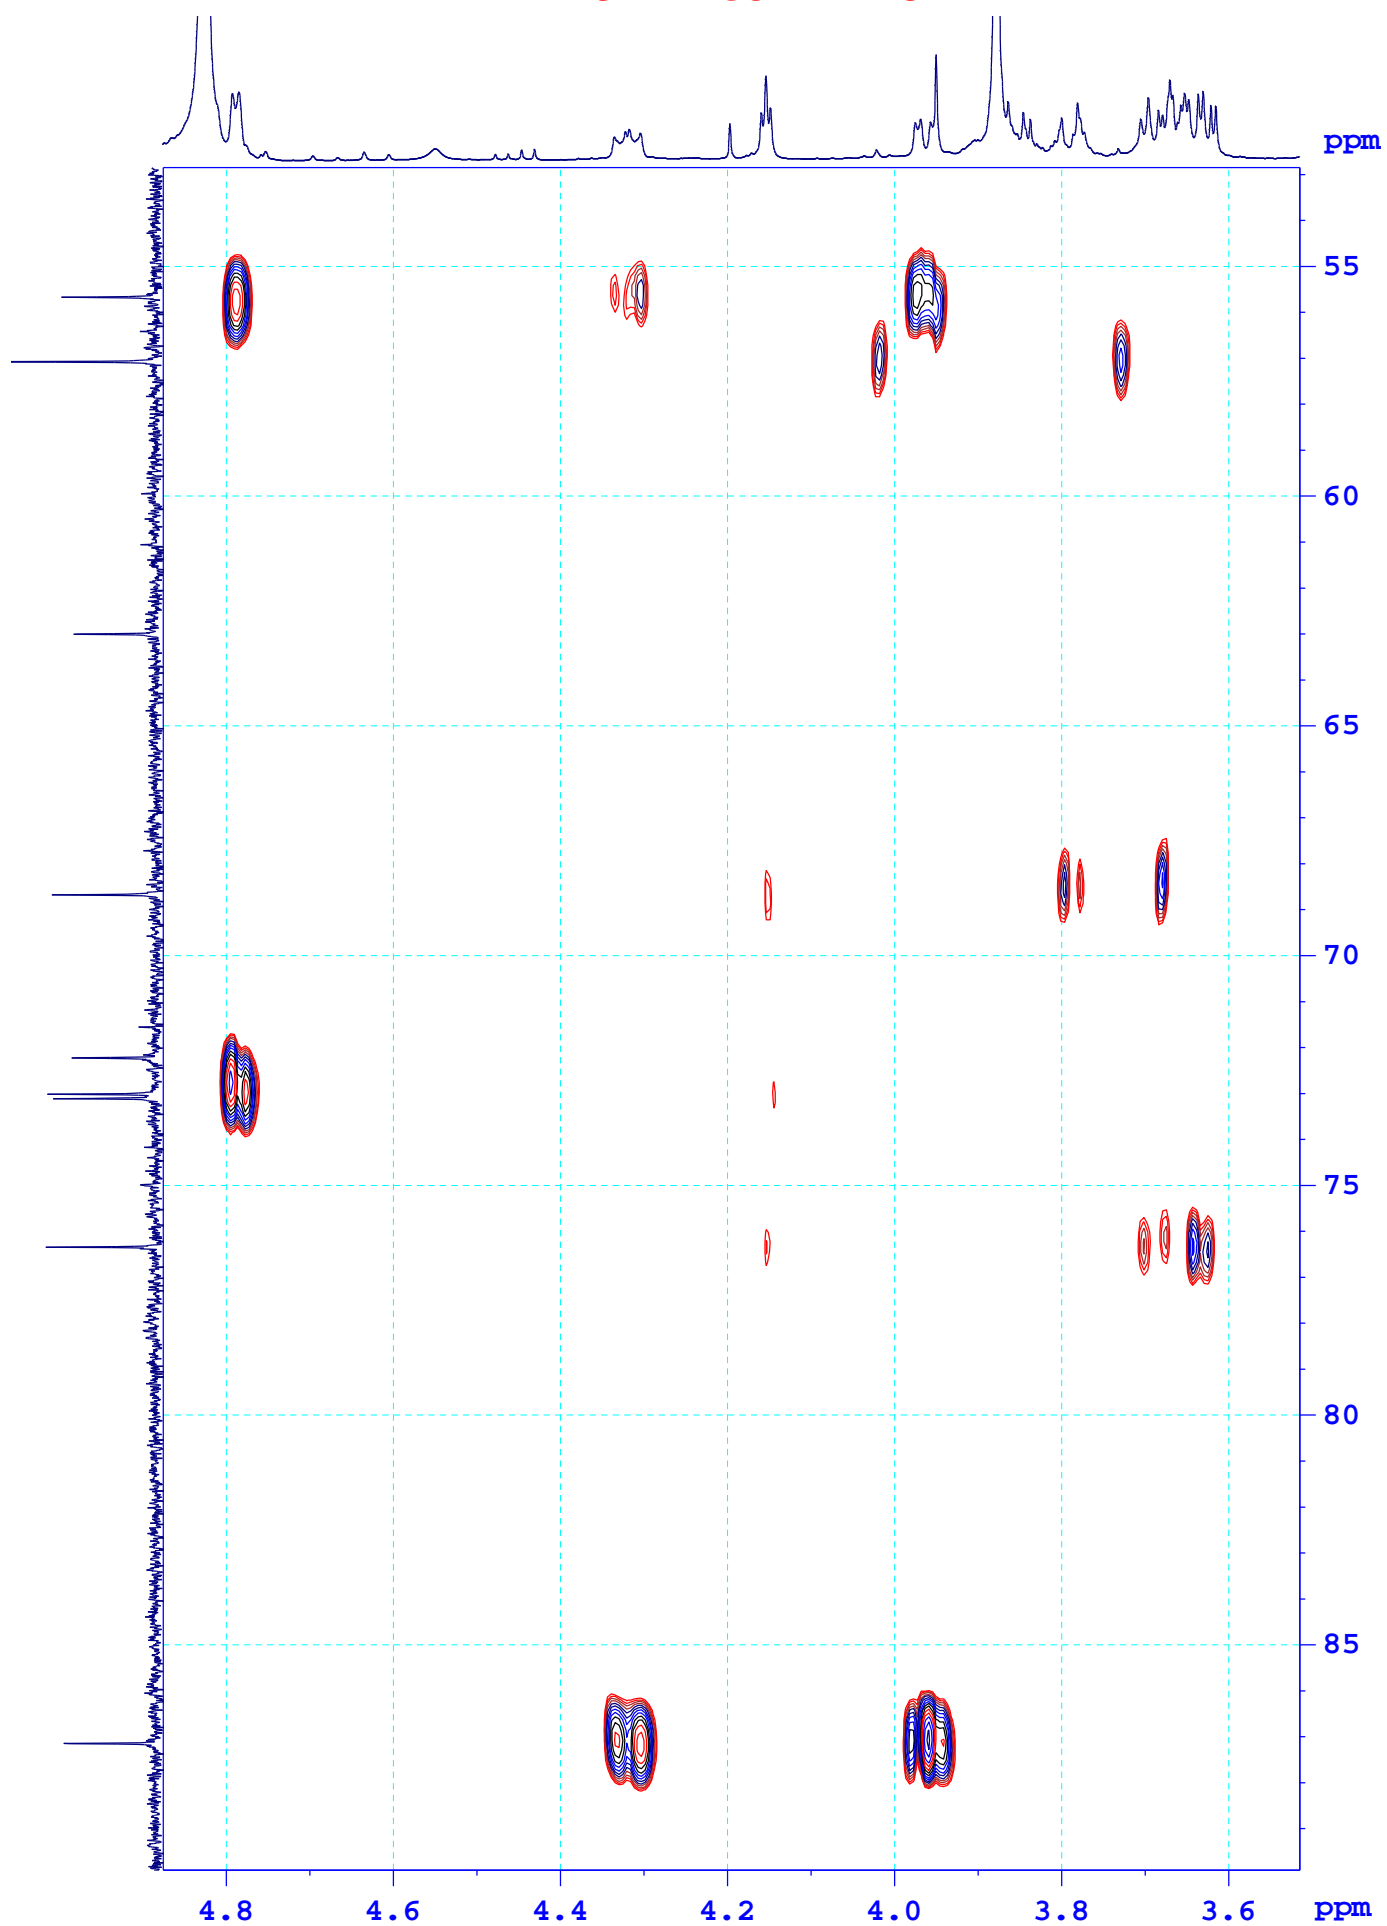

Supplement: s1 [file s1]

# CB7-MeOD-C13CPD &DEPT

DEPT90

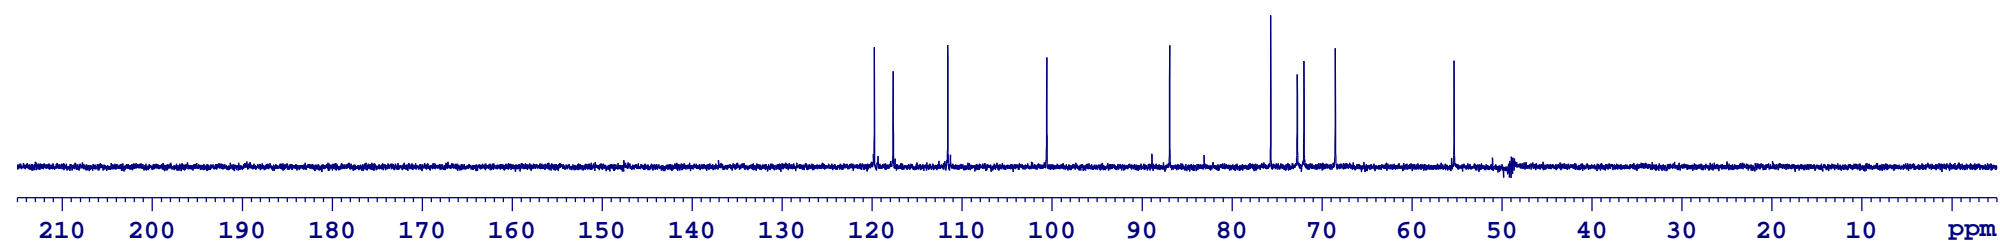

DEPT135

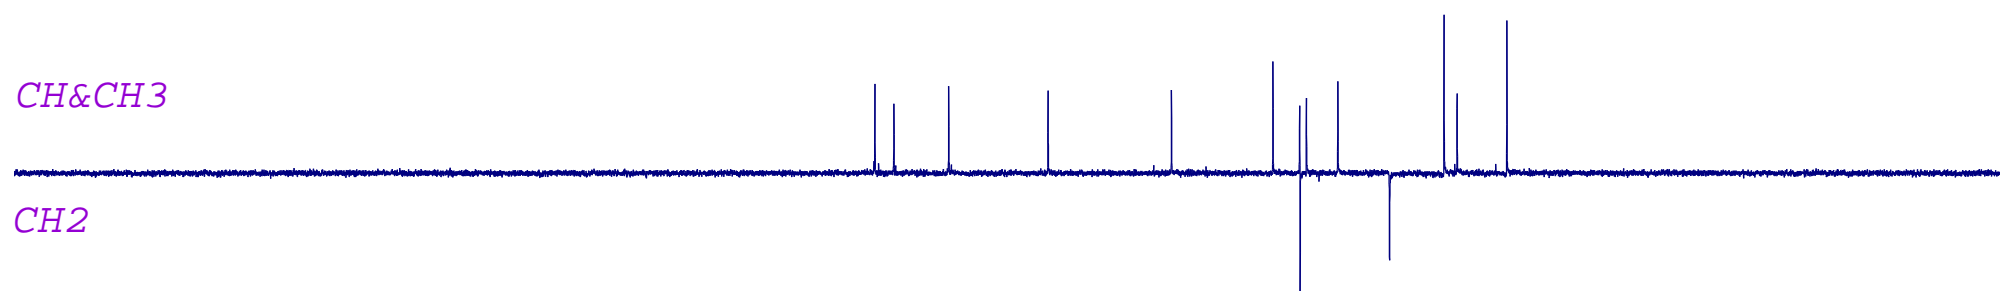

CH2

C13CPD

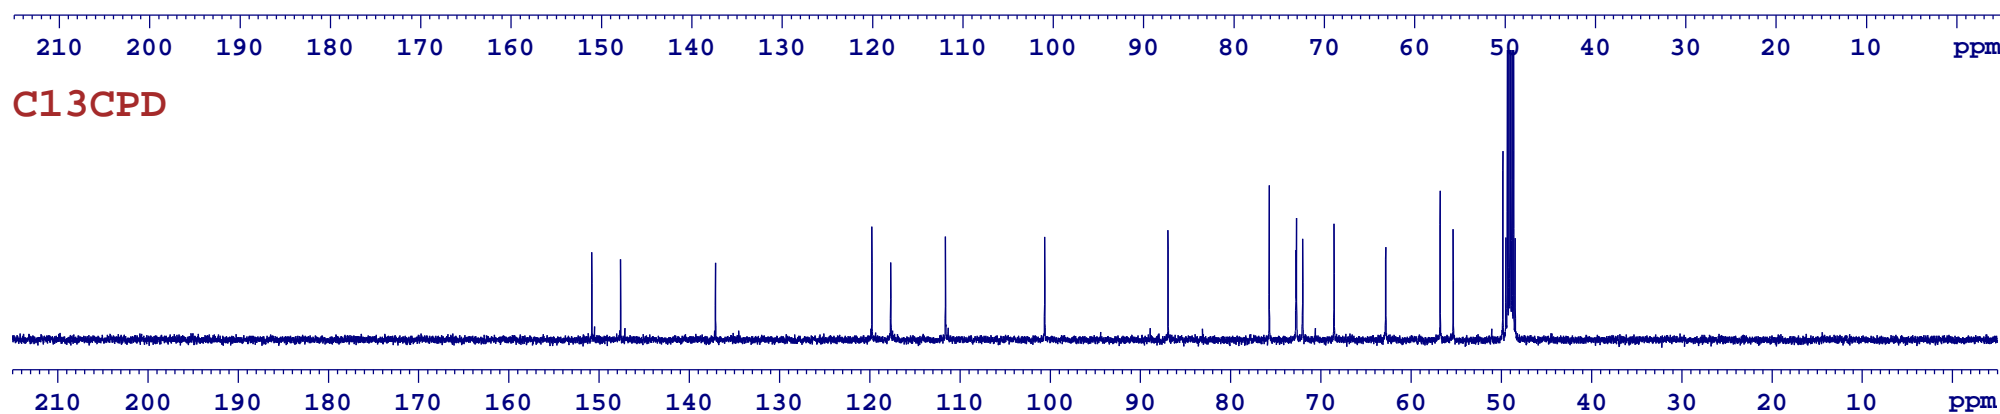

# CB7-MeOD-C13CPD &DEPT

DEPT90

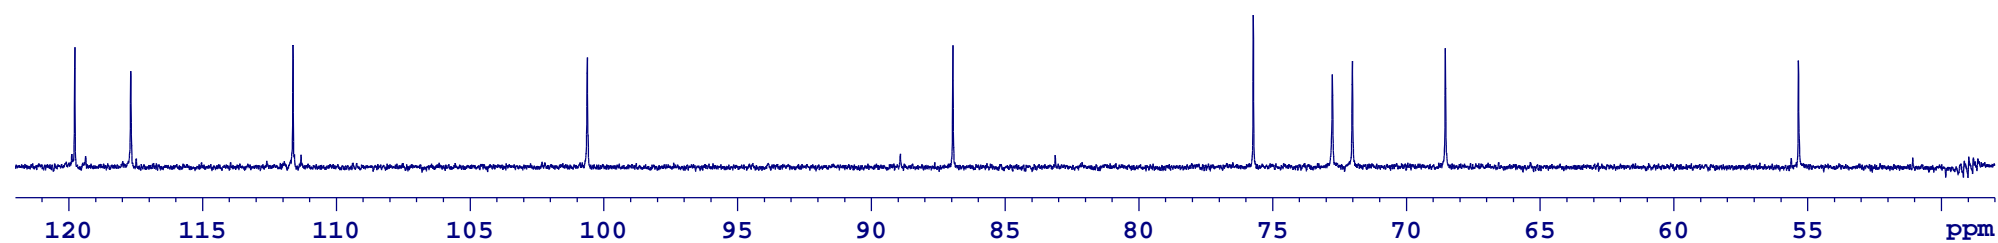

DEPT135

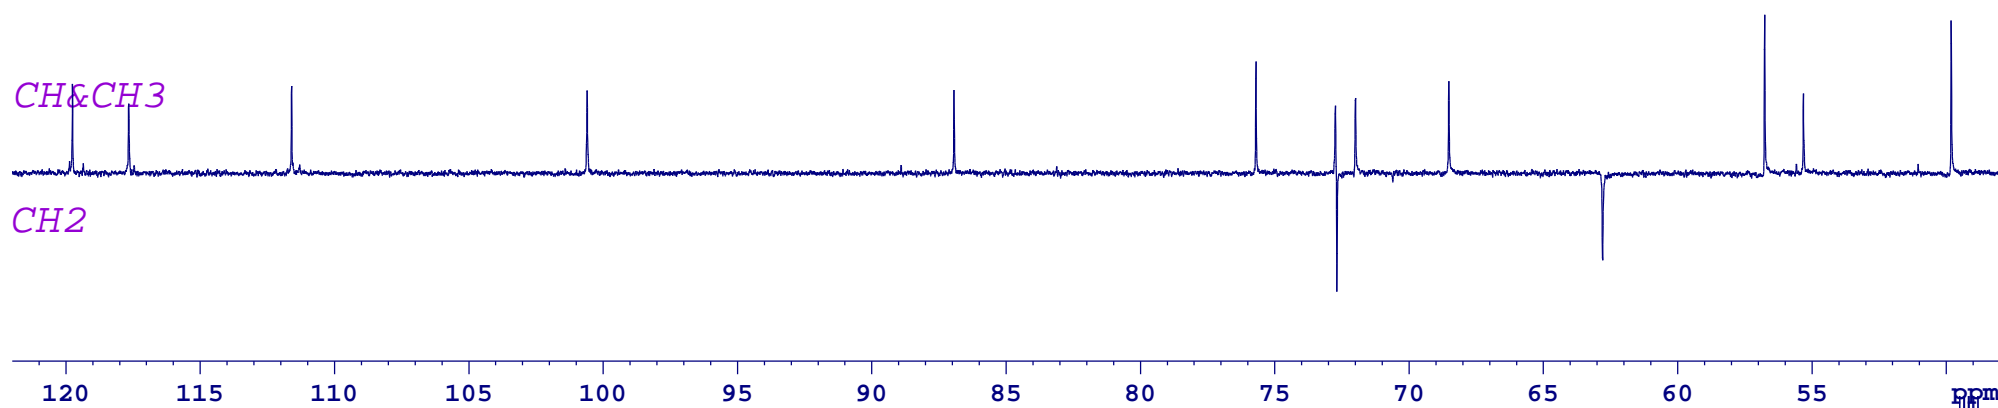

C13CPD

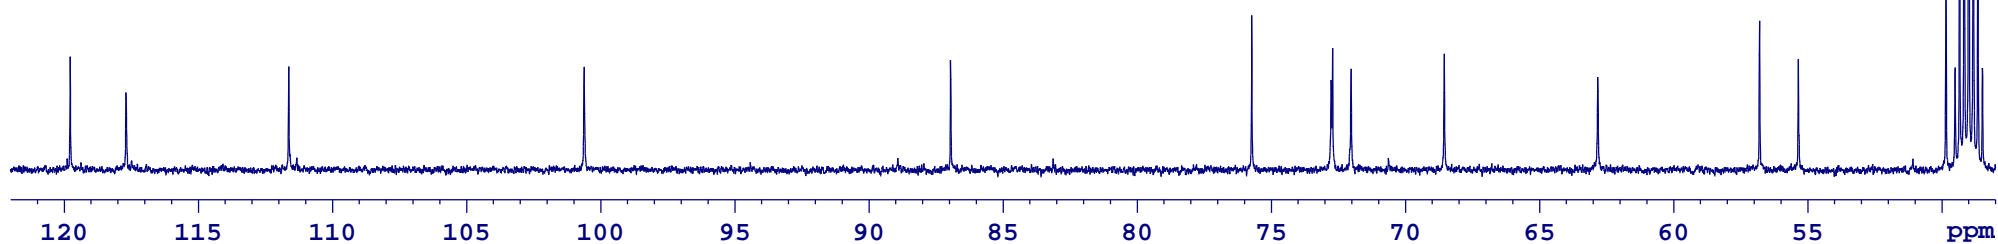

Supplement: s1 [file s1]

*CB7-MeOD-HSQC*

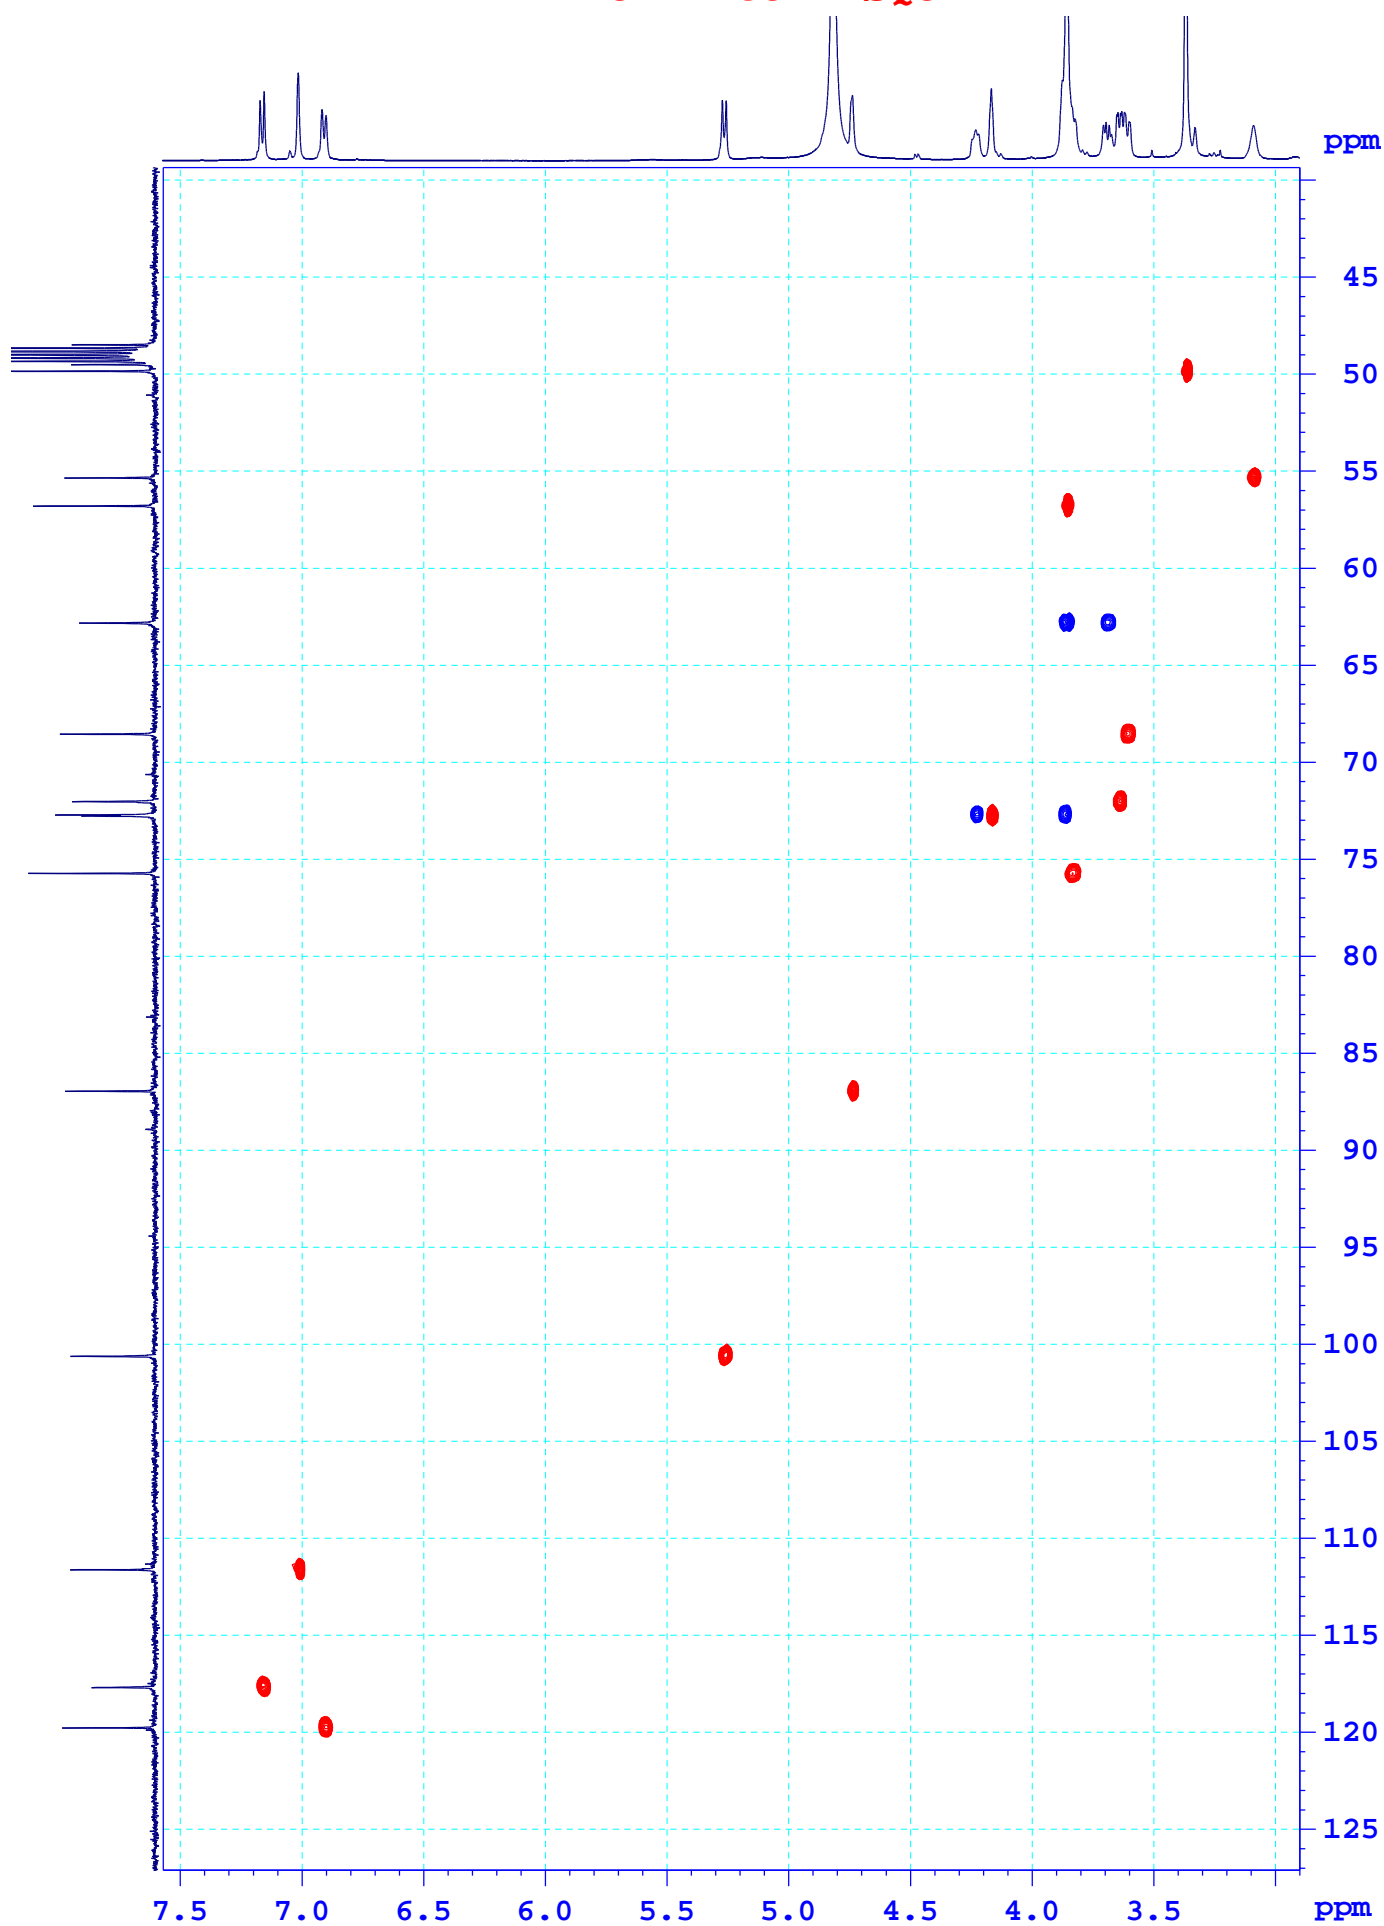

*CB7-MeOD-HSQC*

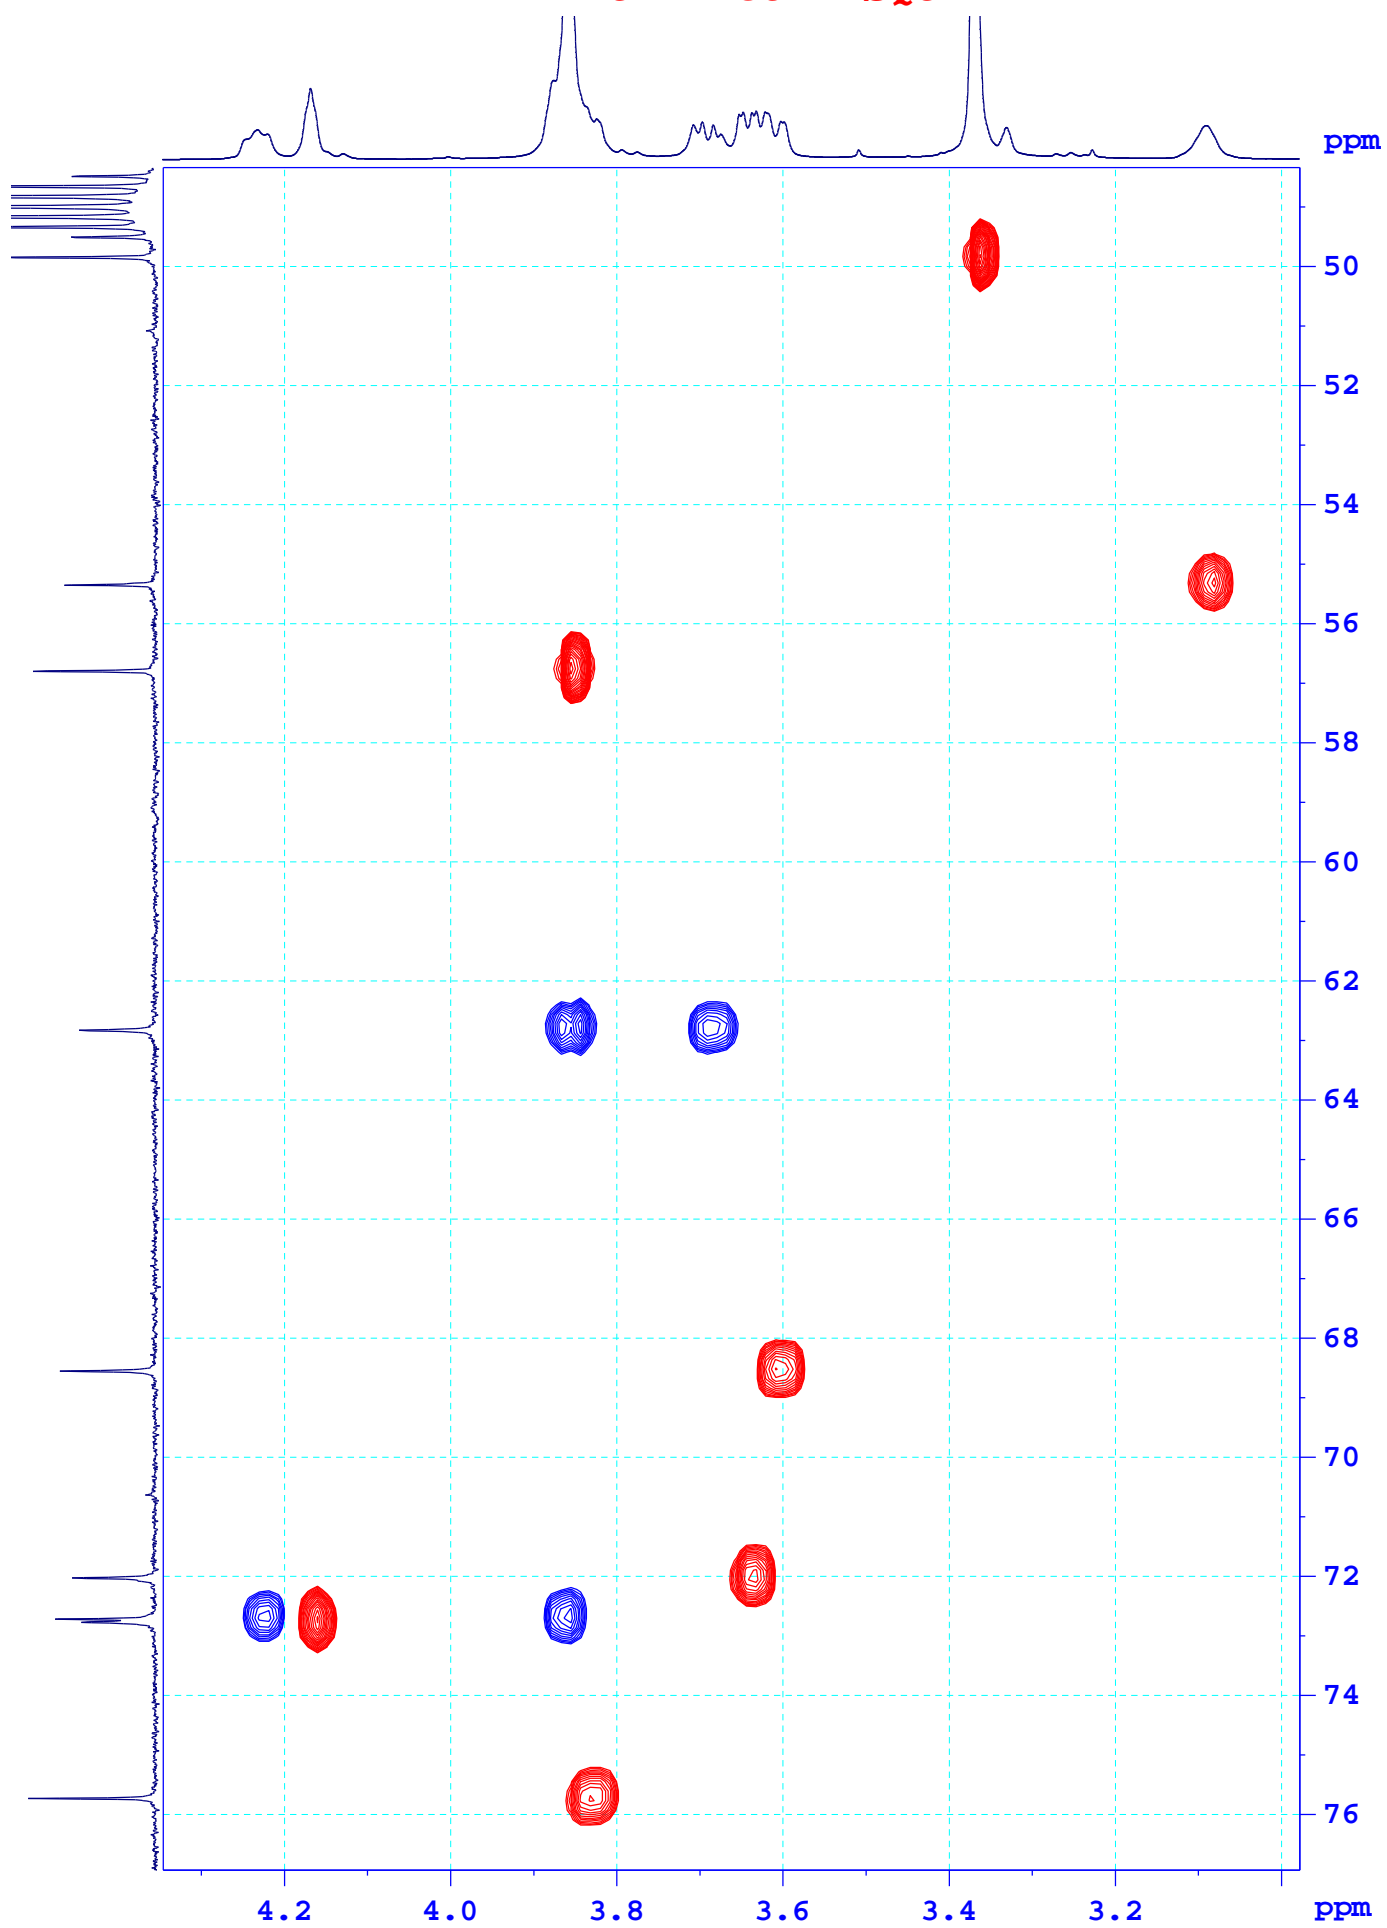

*CB7-MeOD-HSQC*

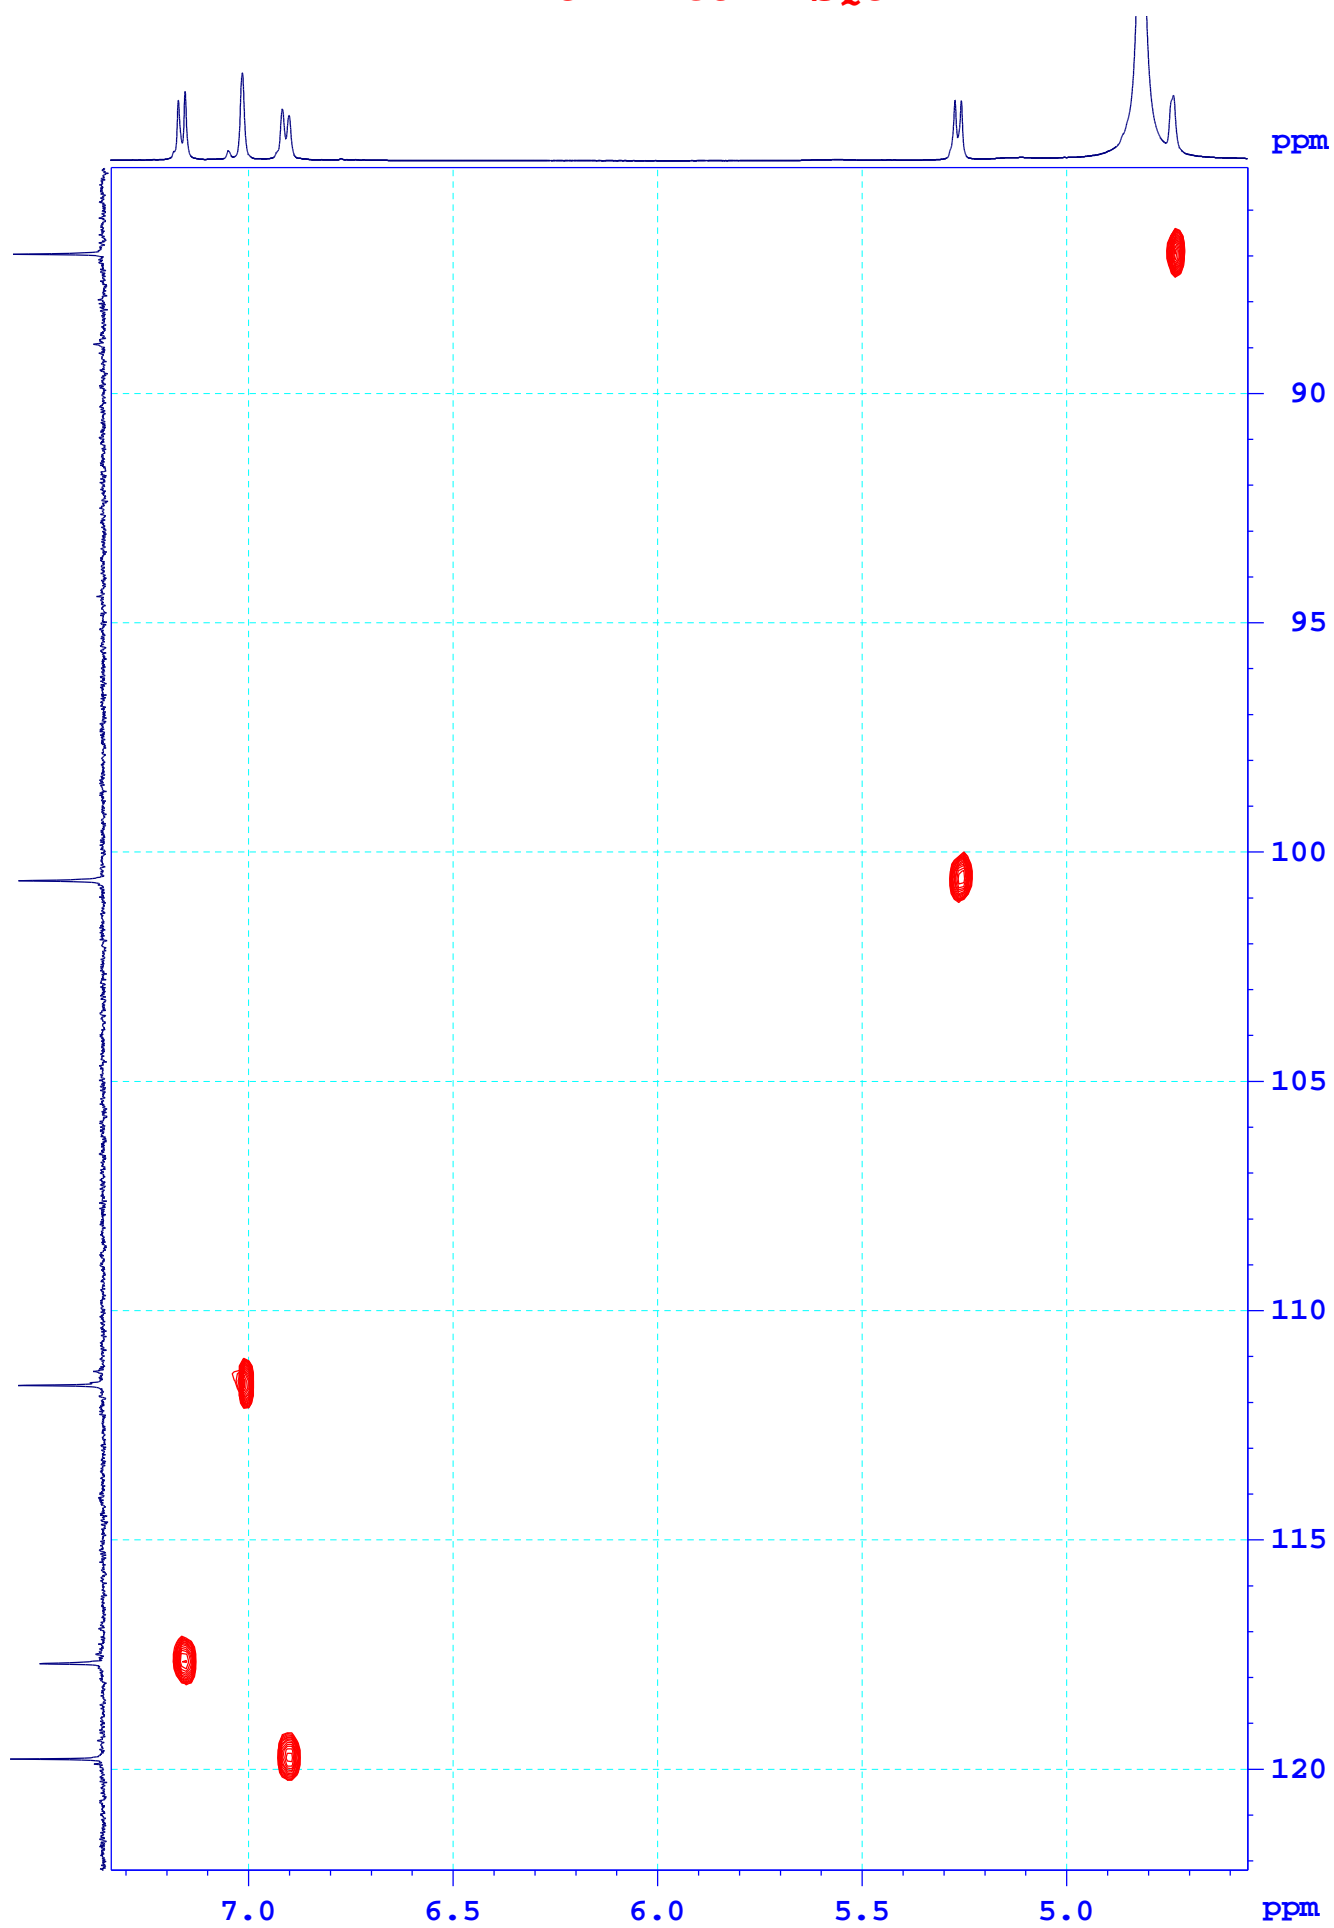

Supplement: s1 [file s1]

# CB3-MeOD-C13CPD &DEPT

DEPT90

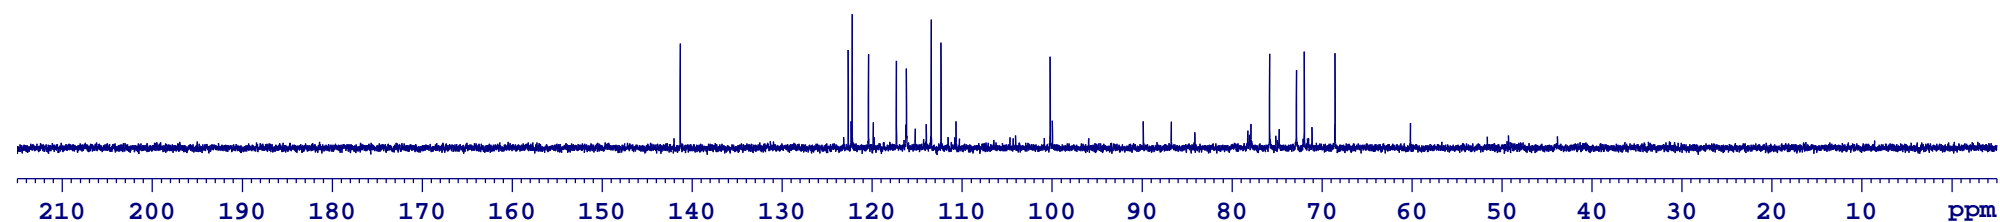

DEPT135

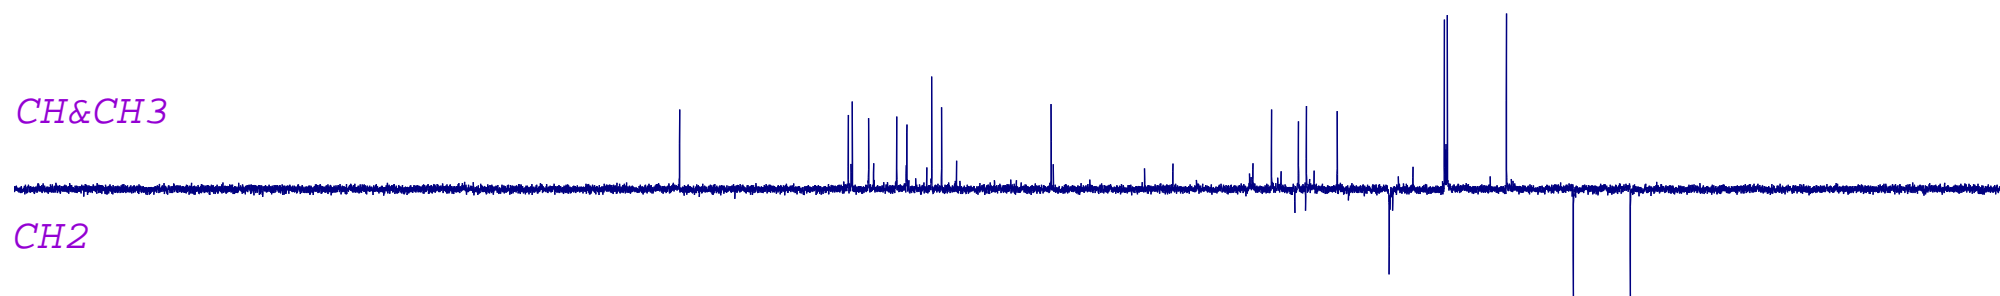

C13CPD

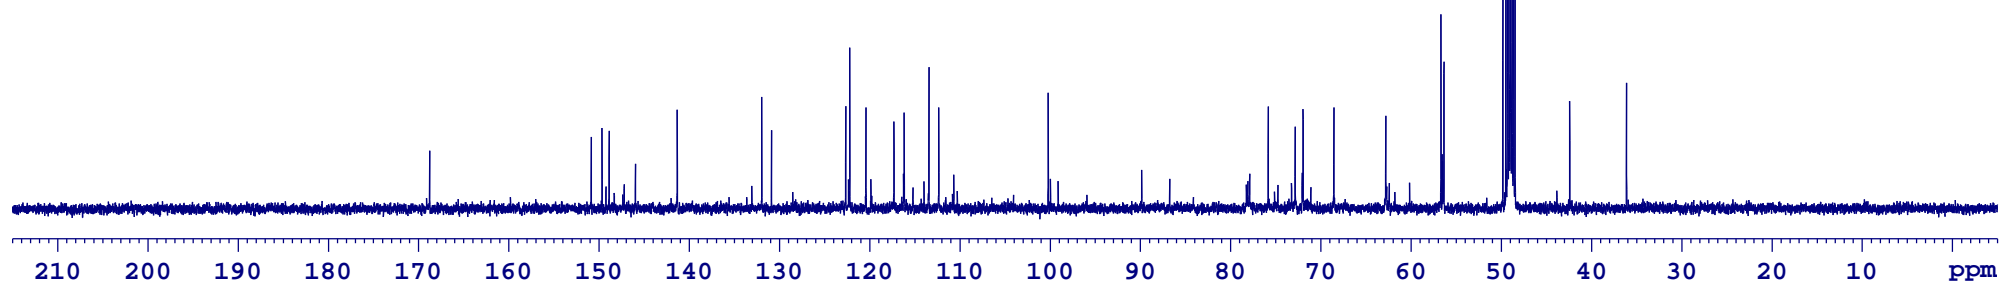

# CB3-MeOD-C13CPD &DEPT

DEPT90

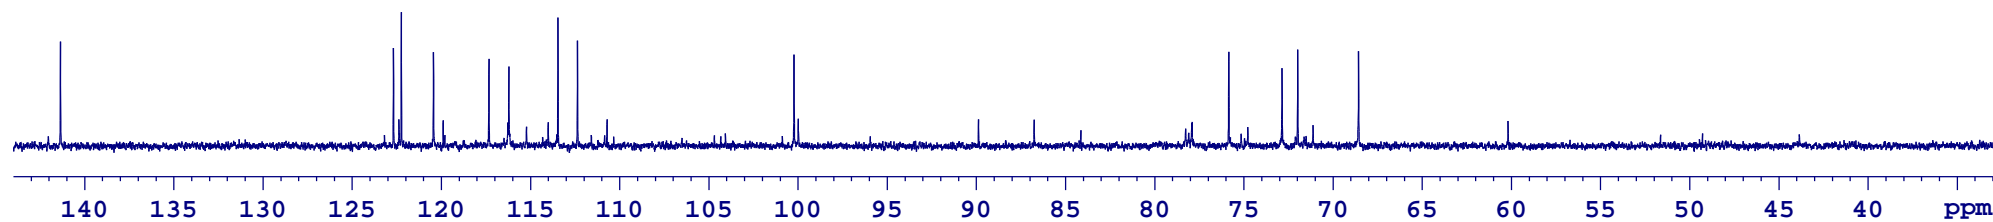

DEPT135

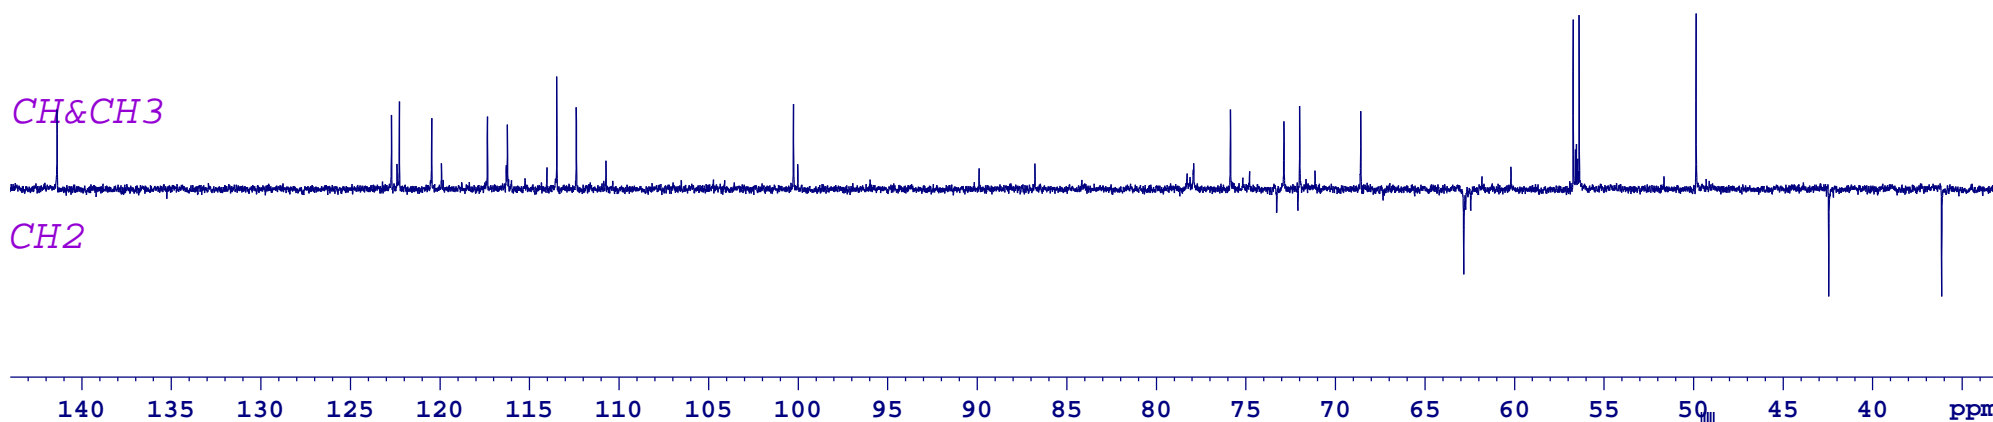

C13CPD

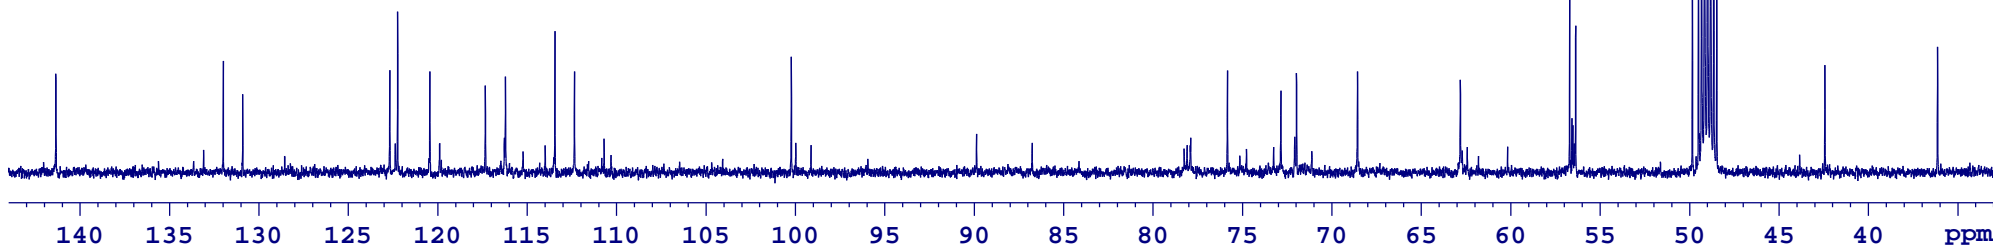

Supplement: s1 [file s1]

*CB3-MeOD-HSQC*

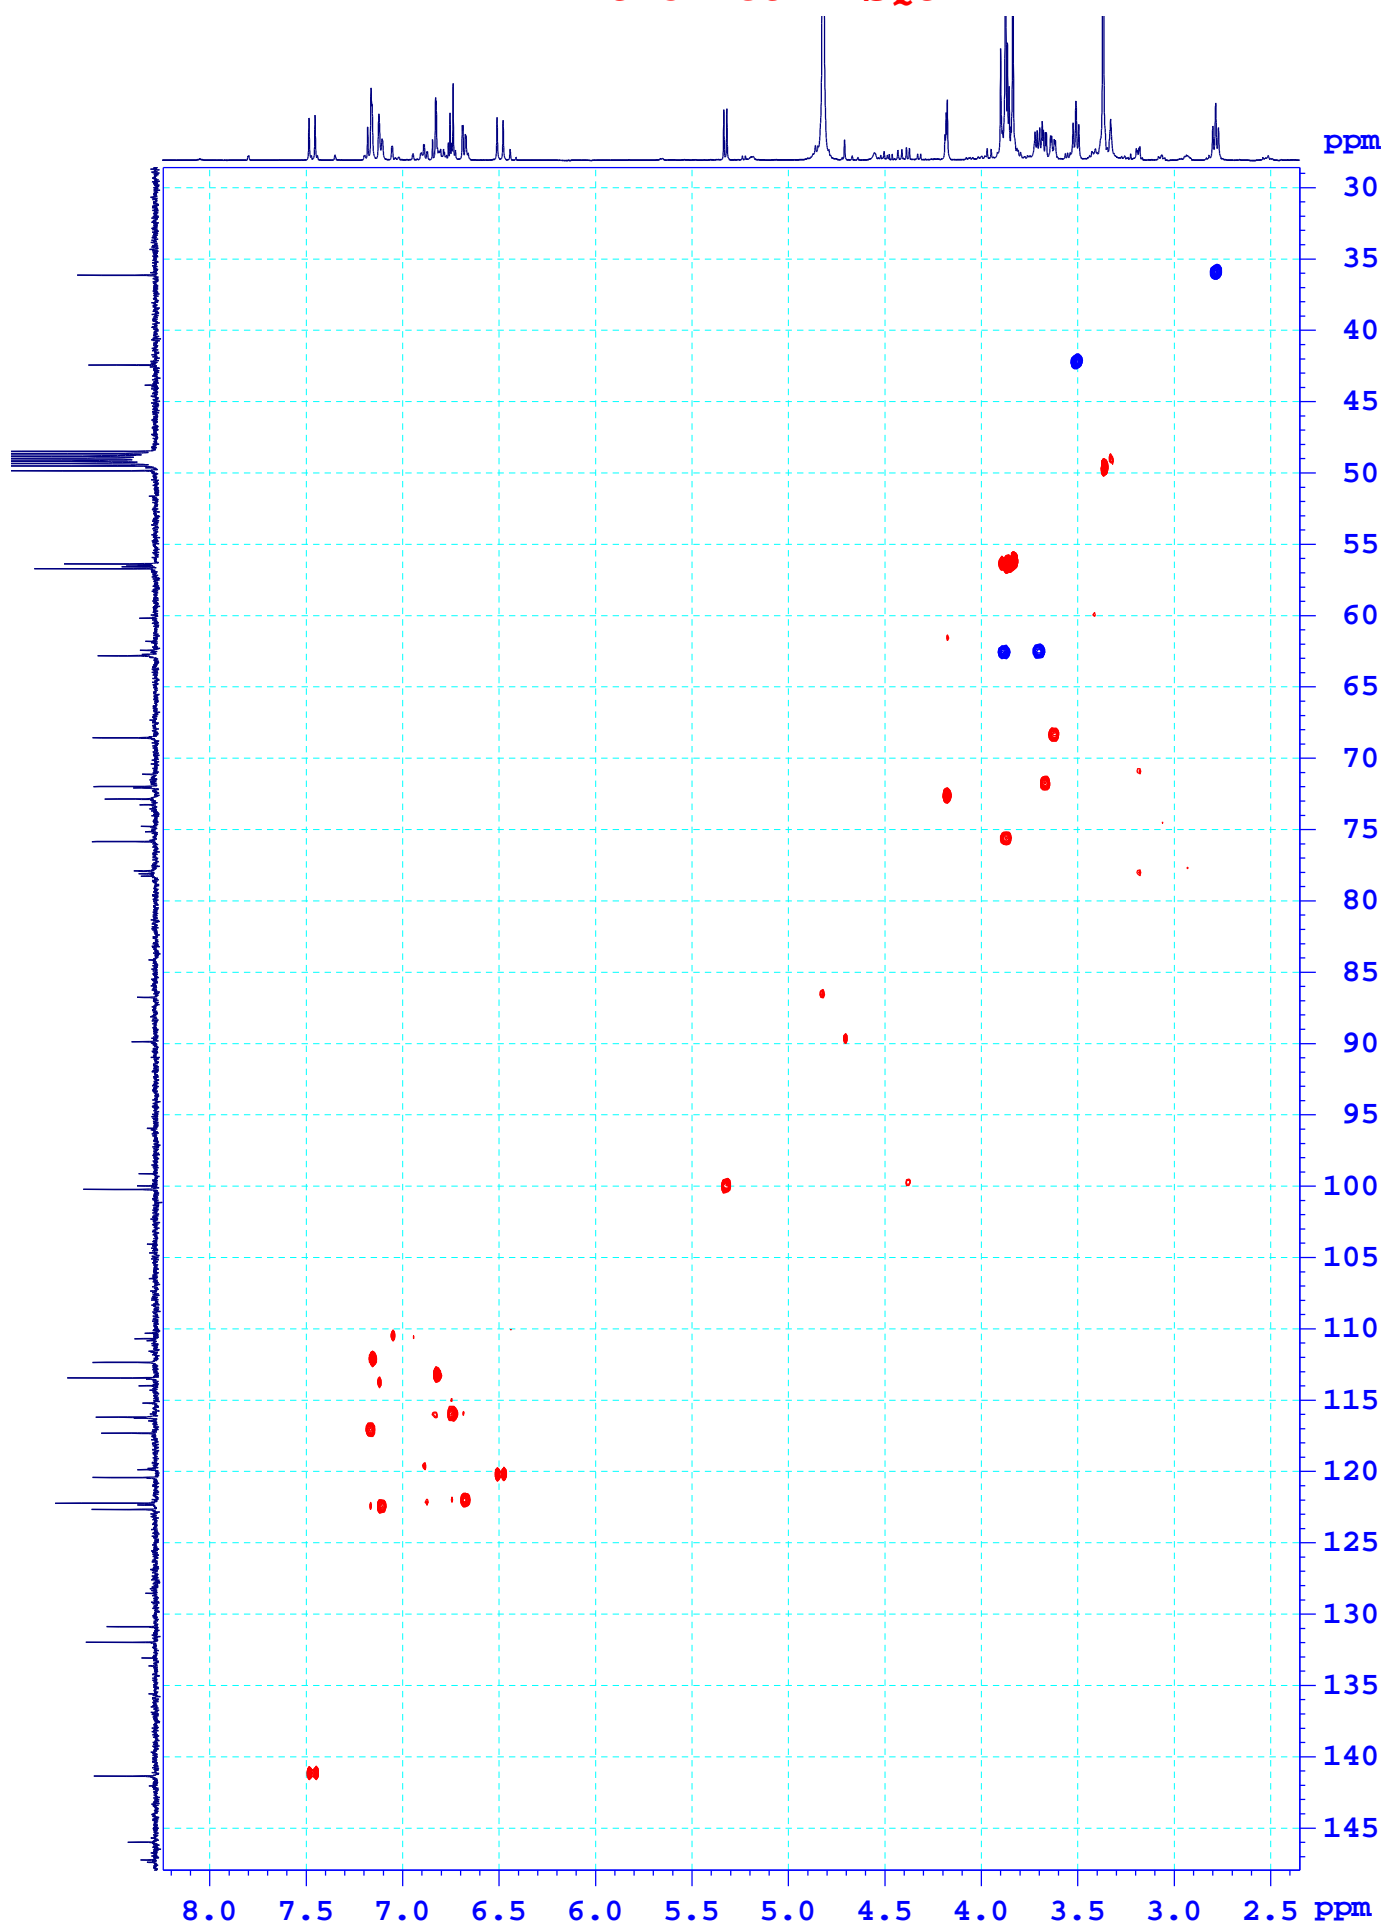

*CB3-MeOD-HSQC*

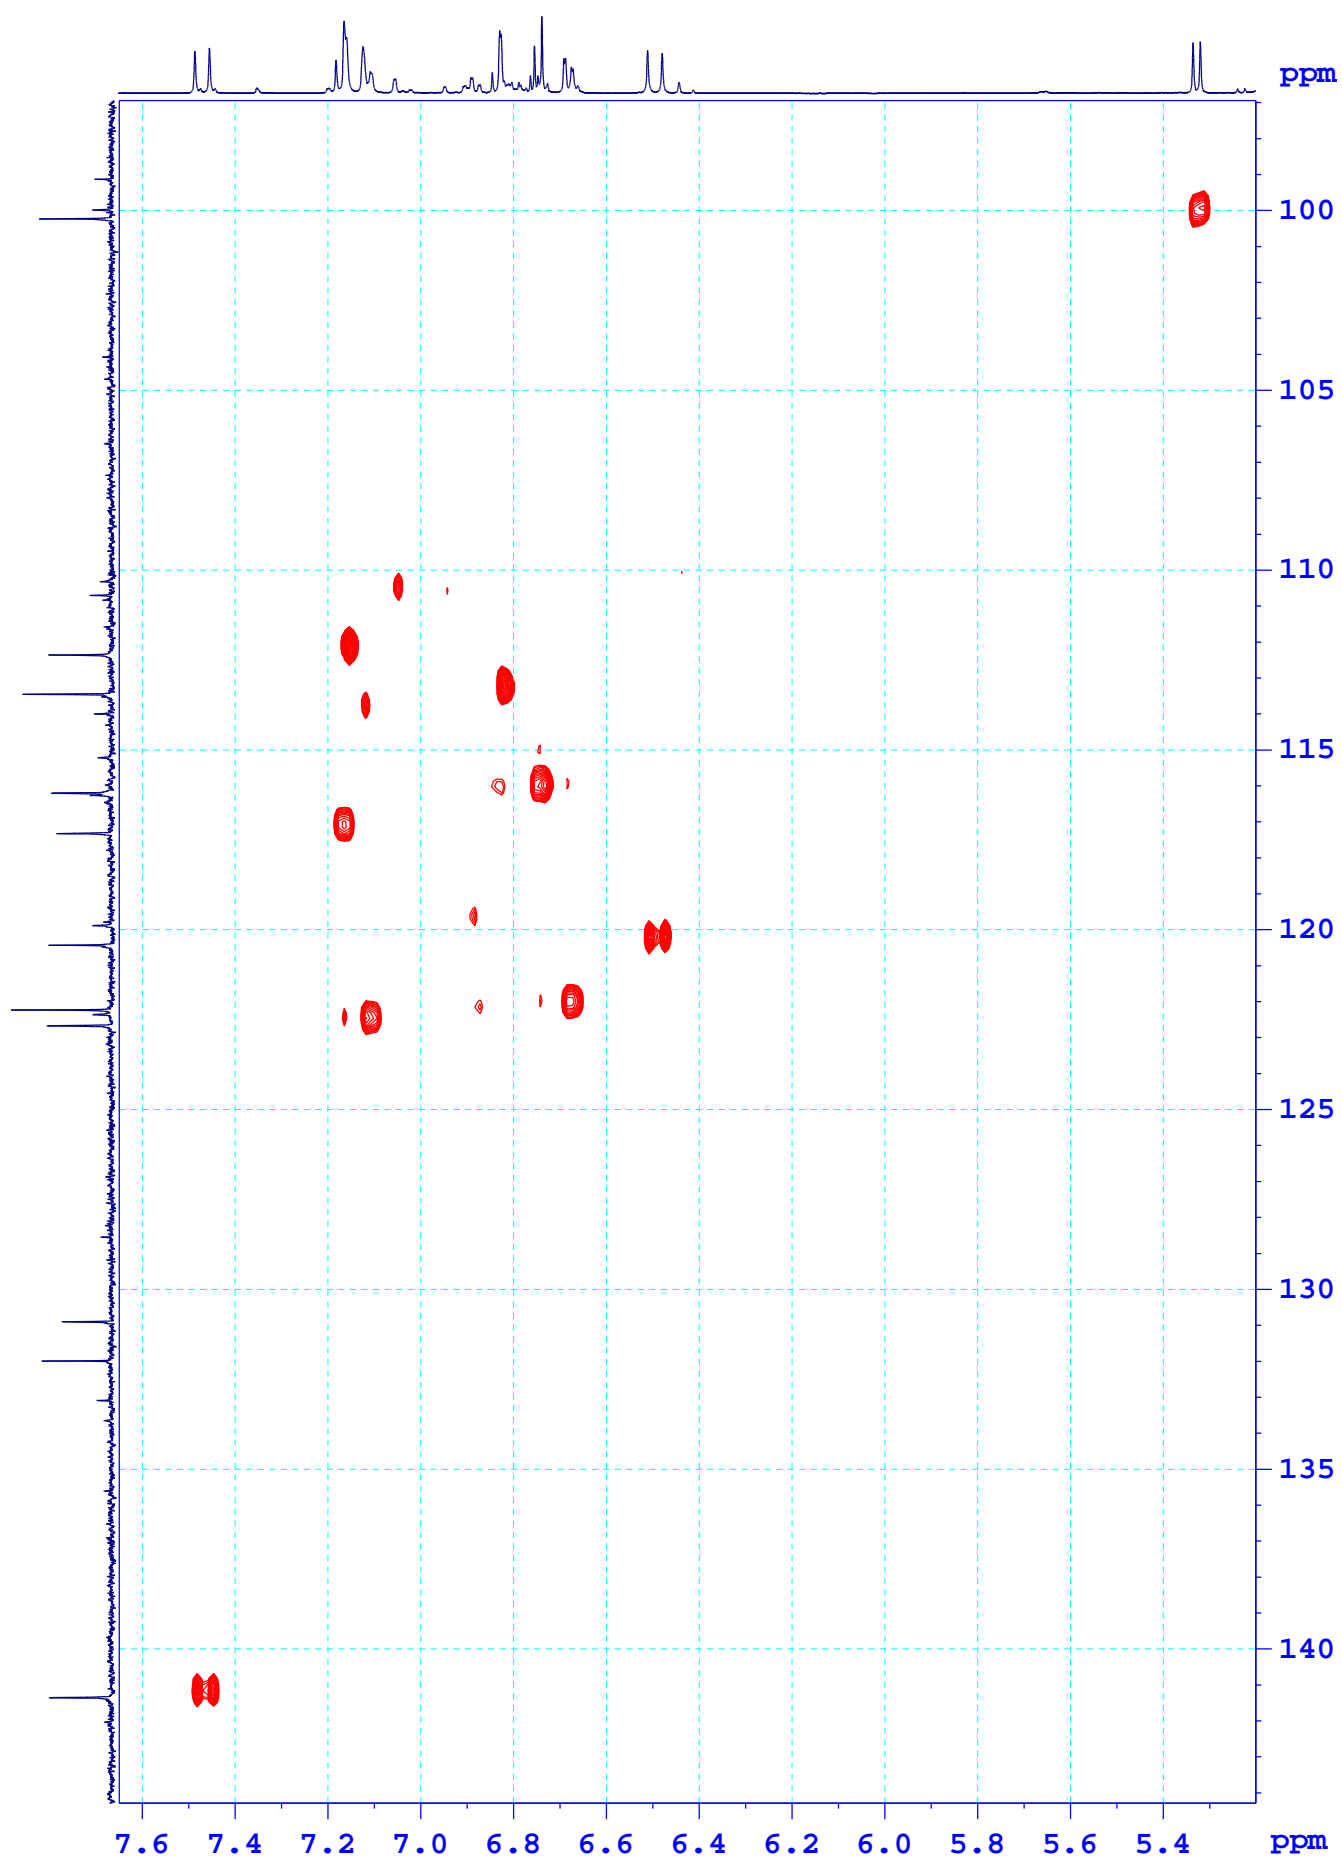

*CB3-MeOD-HSQC*

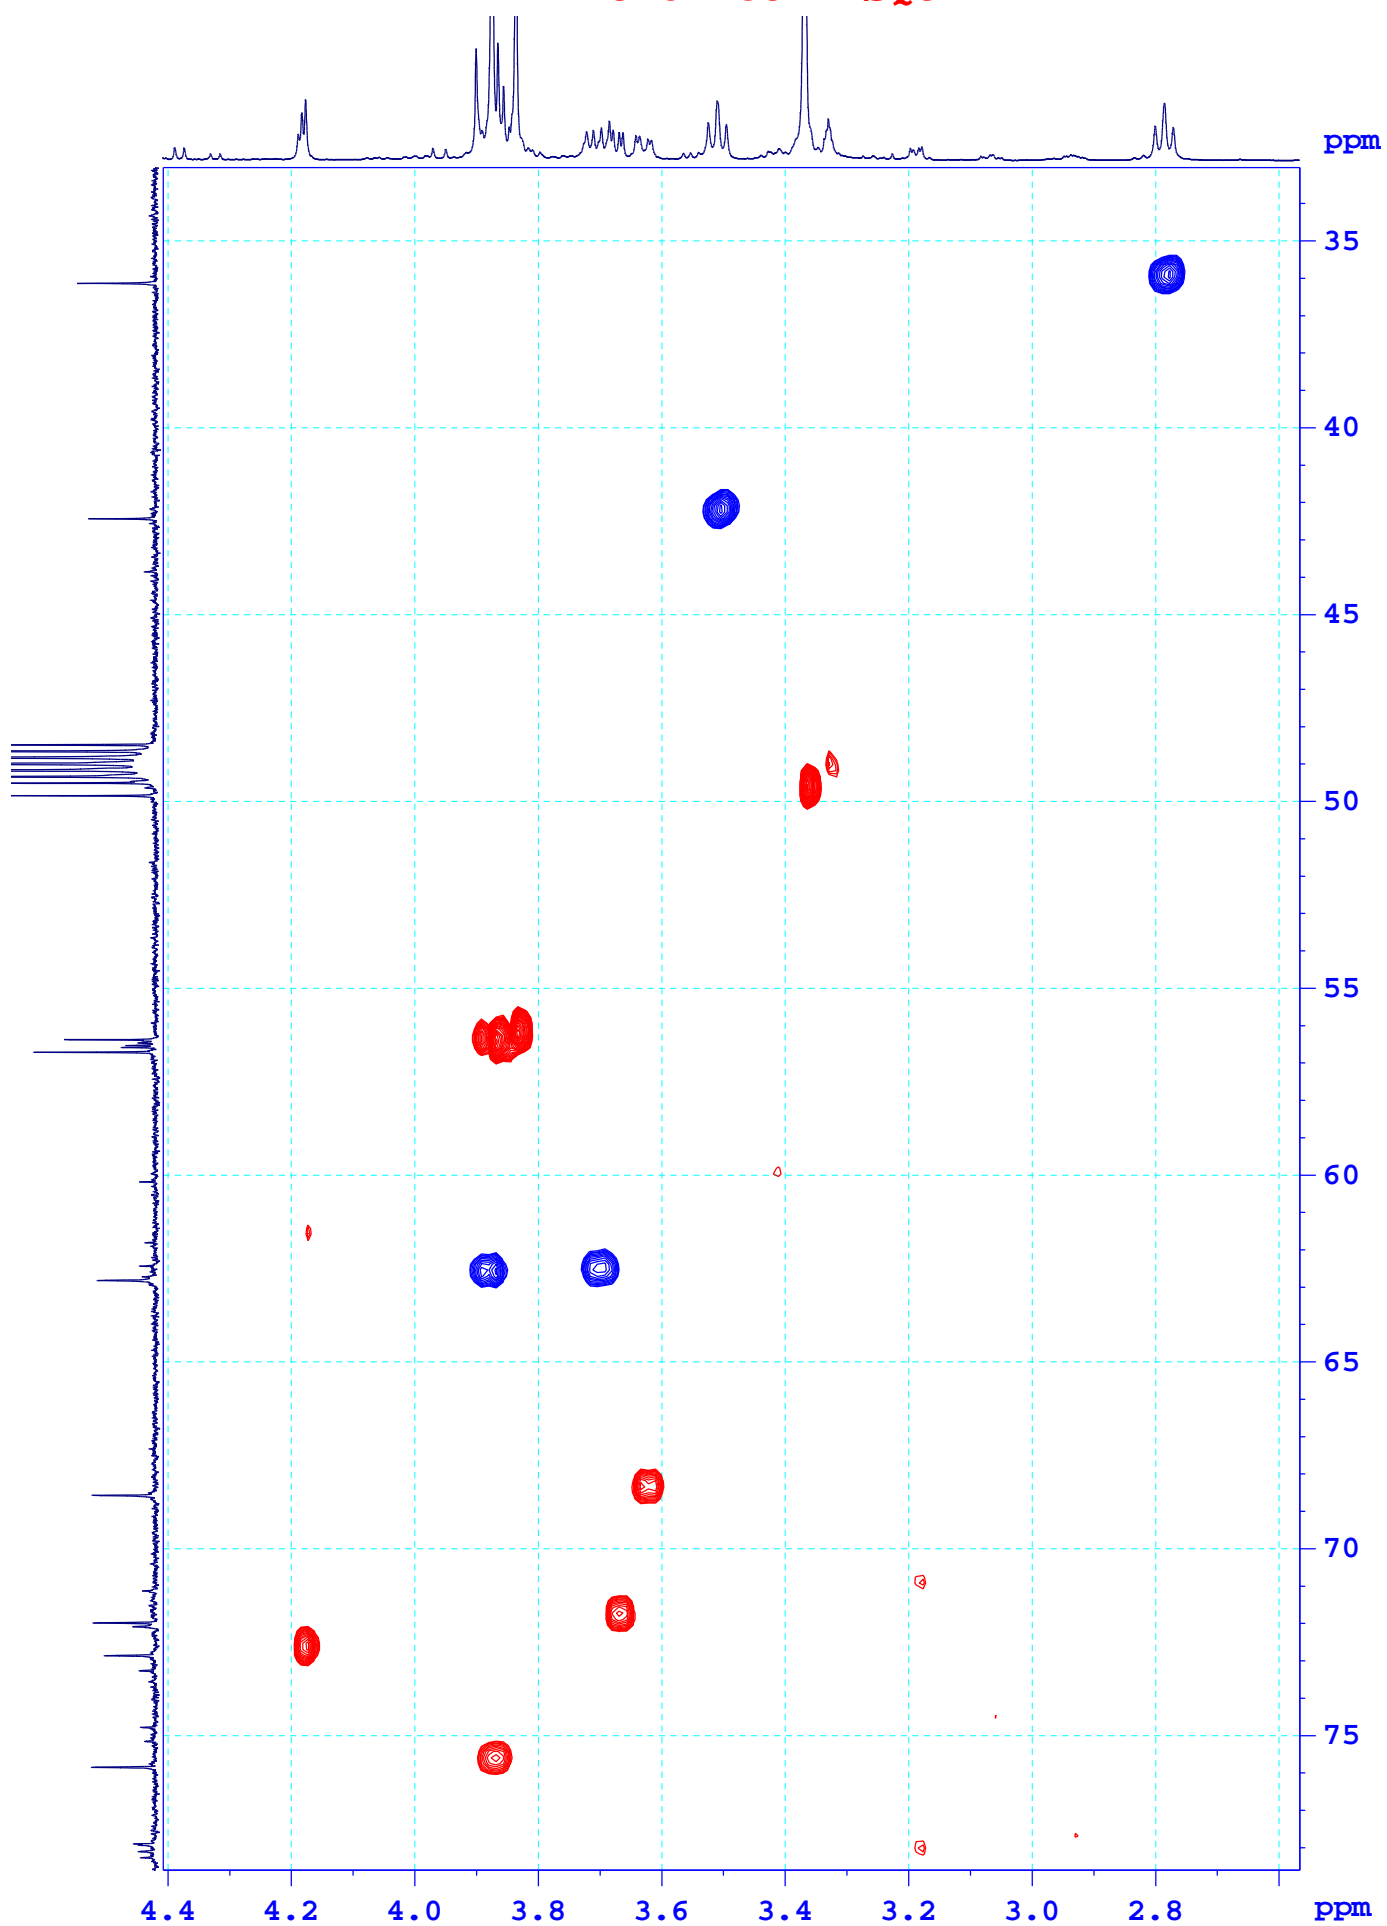

Supplement: s1 [file s1]

*CB3-MeOD-HMBC*

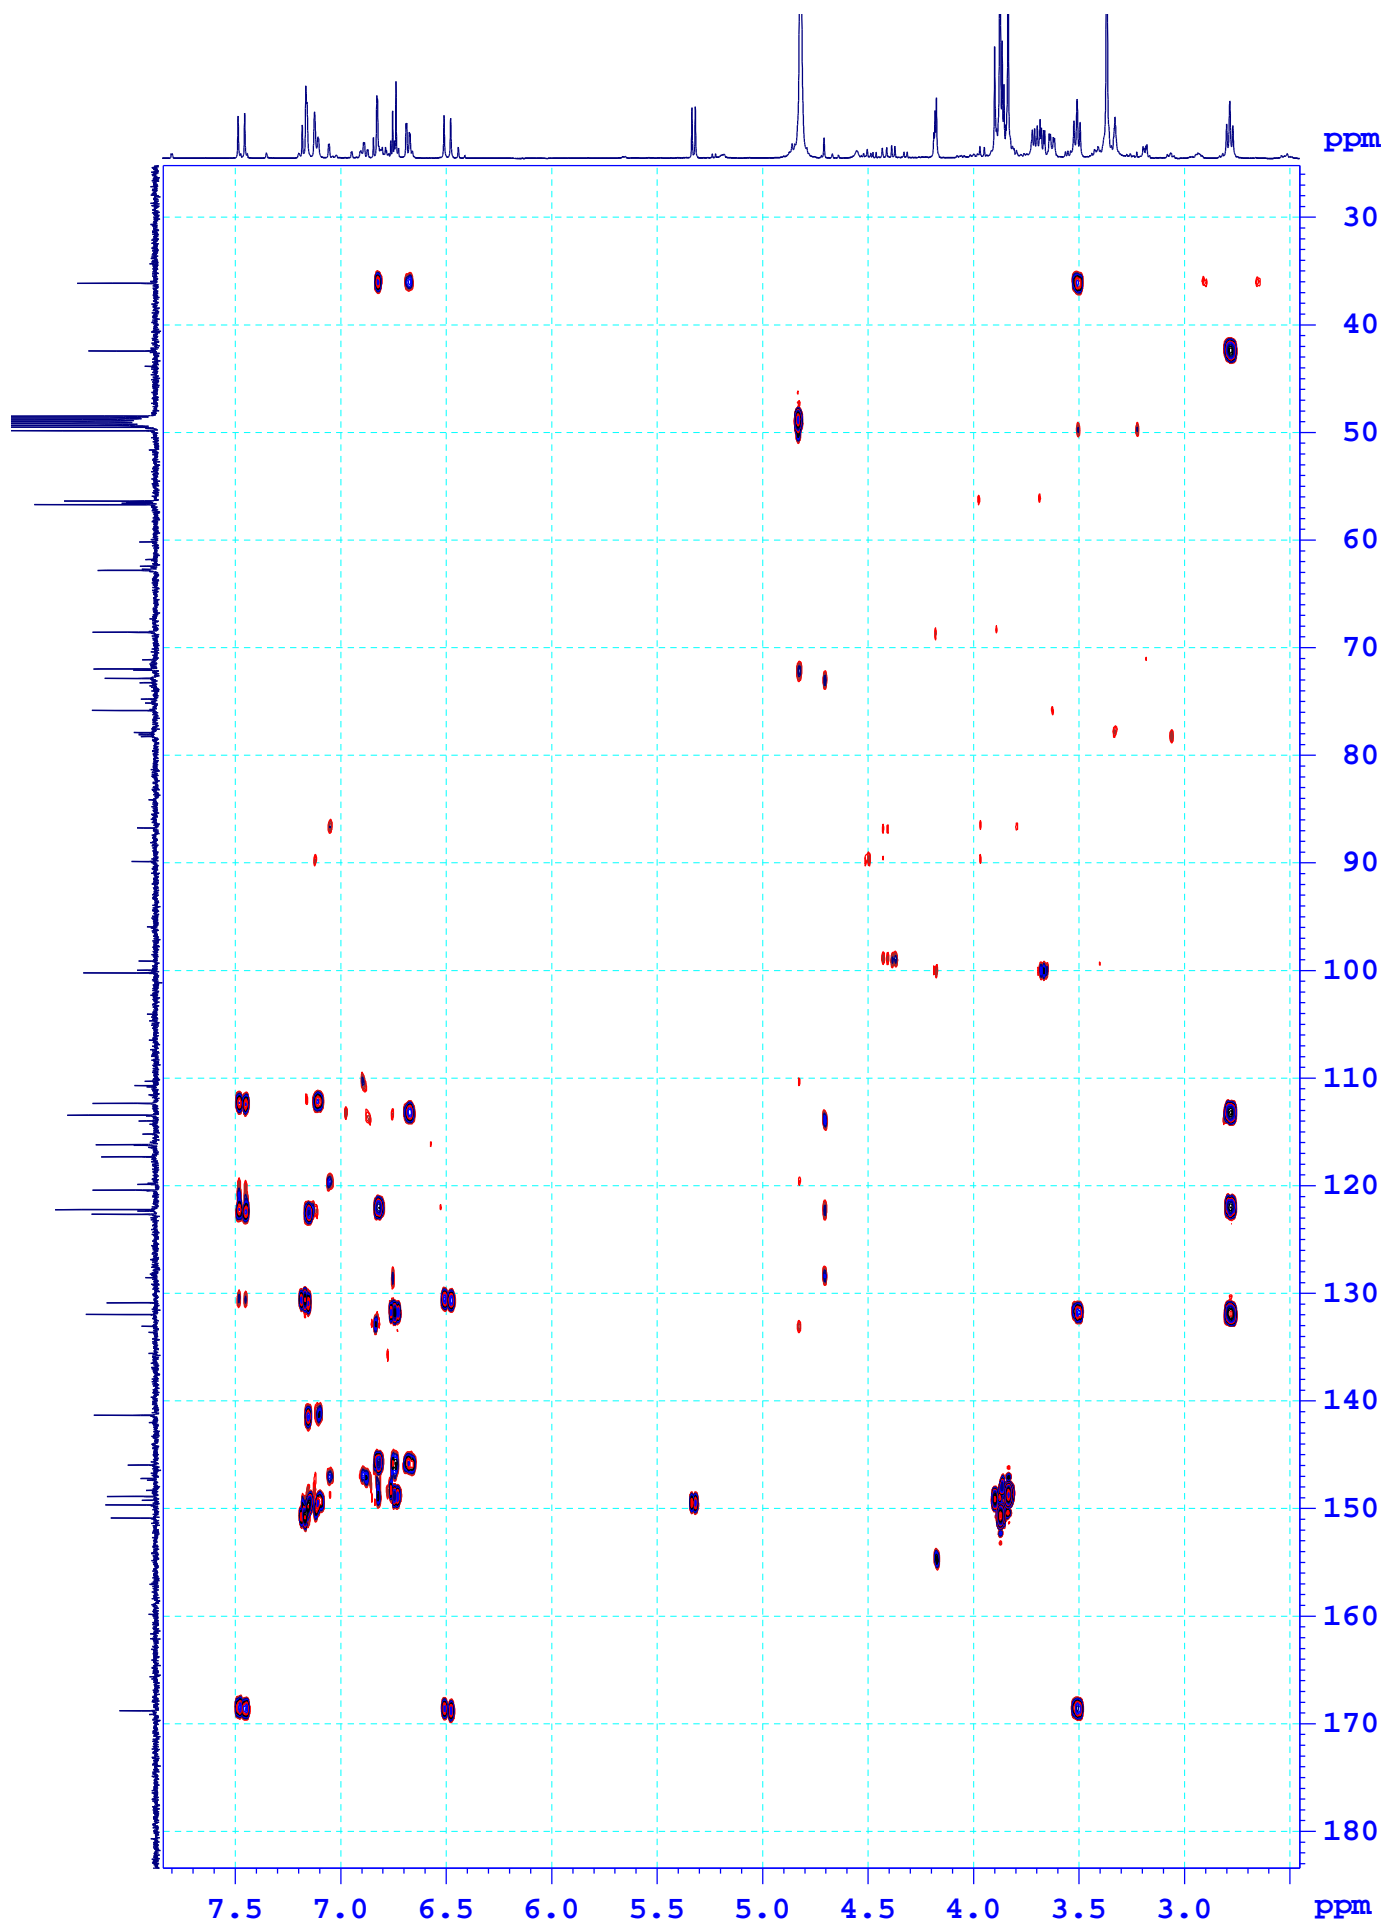

*CB3-MeOD-HMBC*

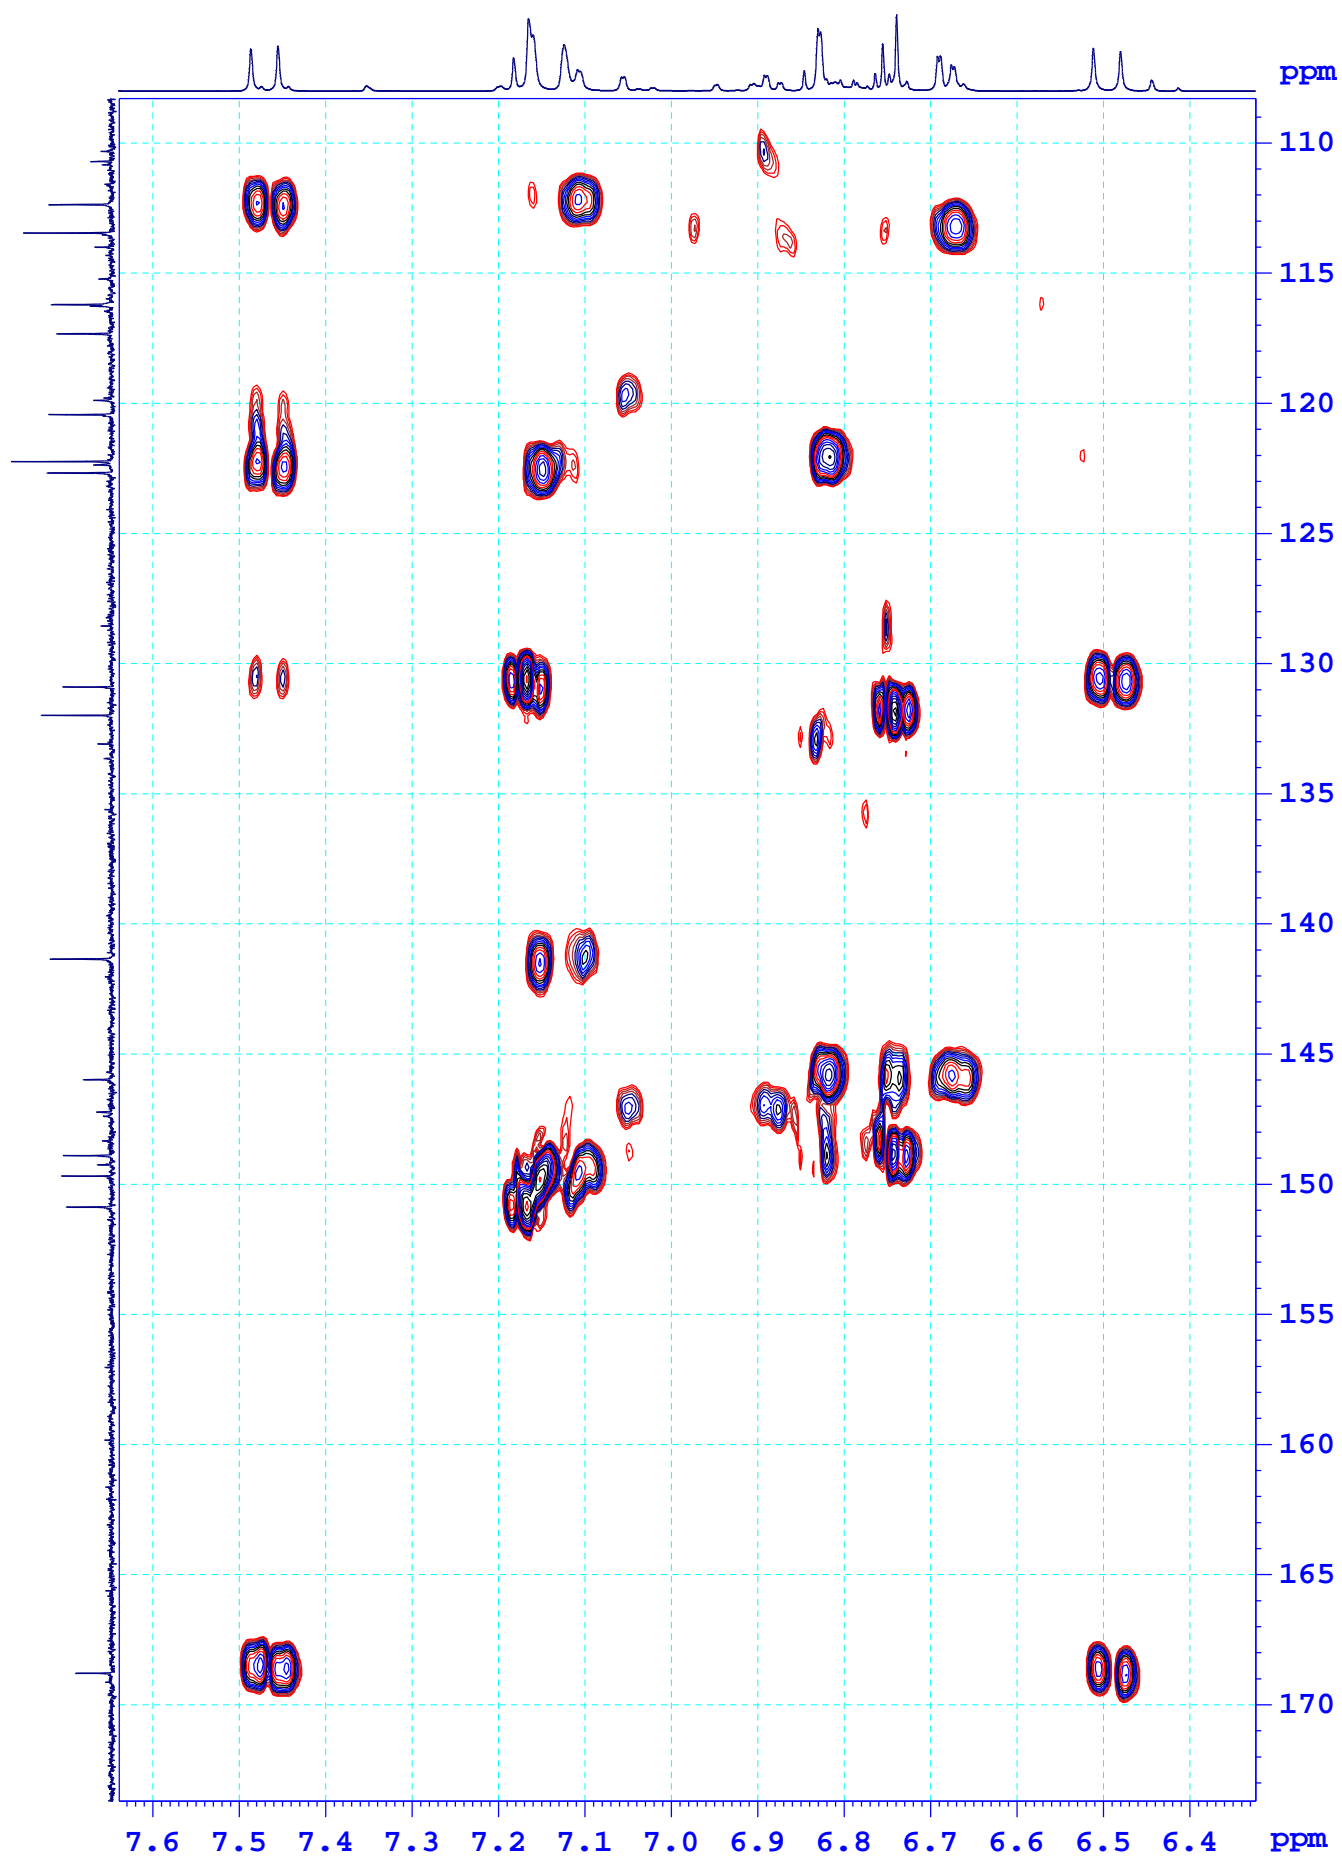

*CB3-MeOD-HMBC*

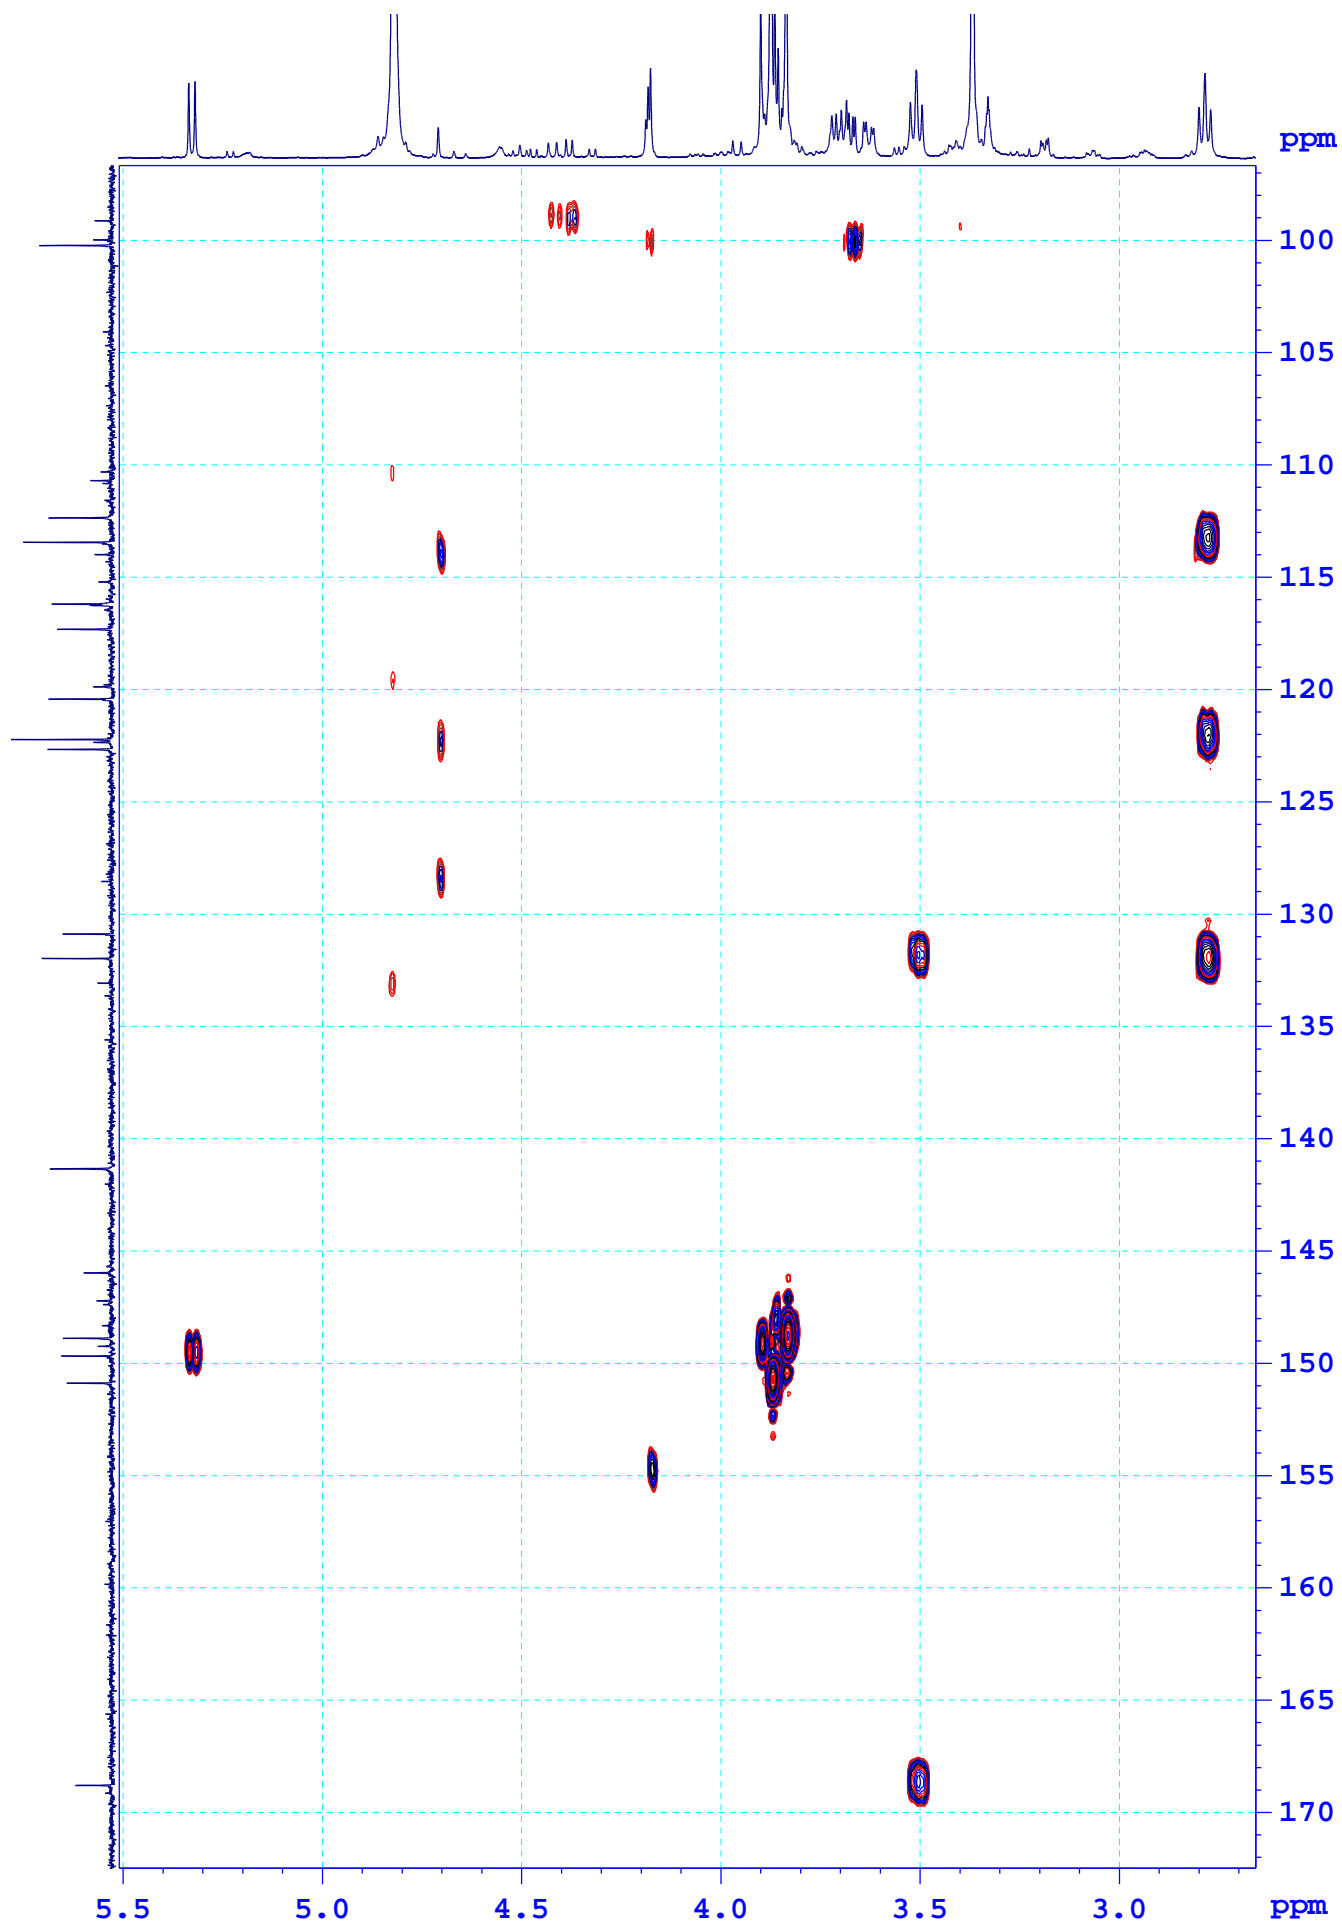

*CB3-MeOD-HMBC*

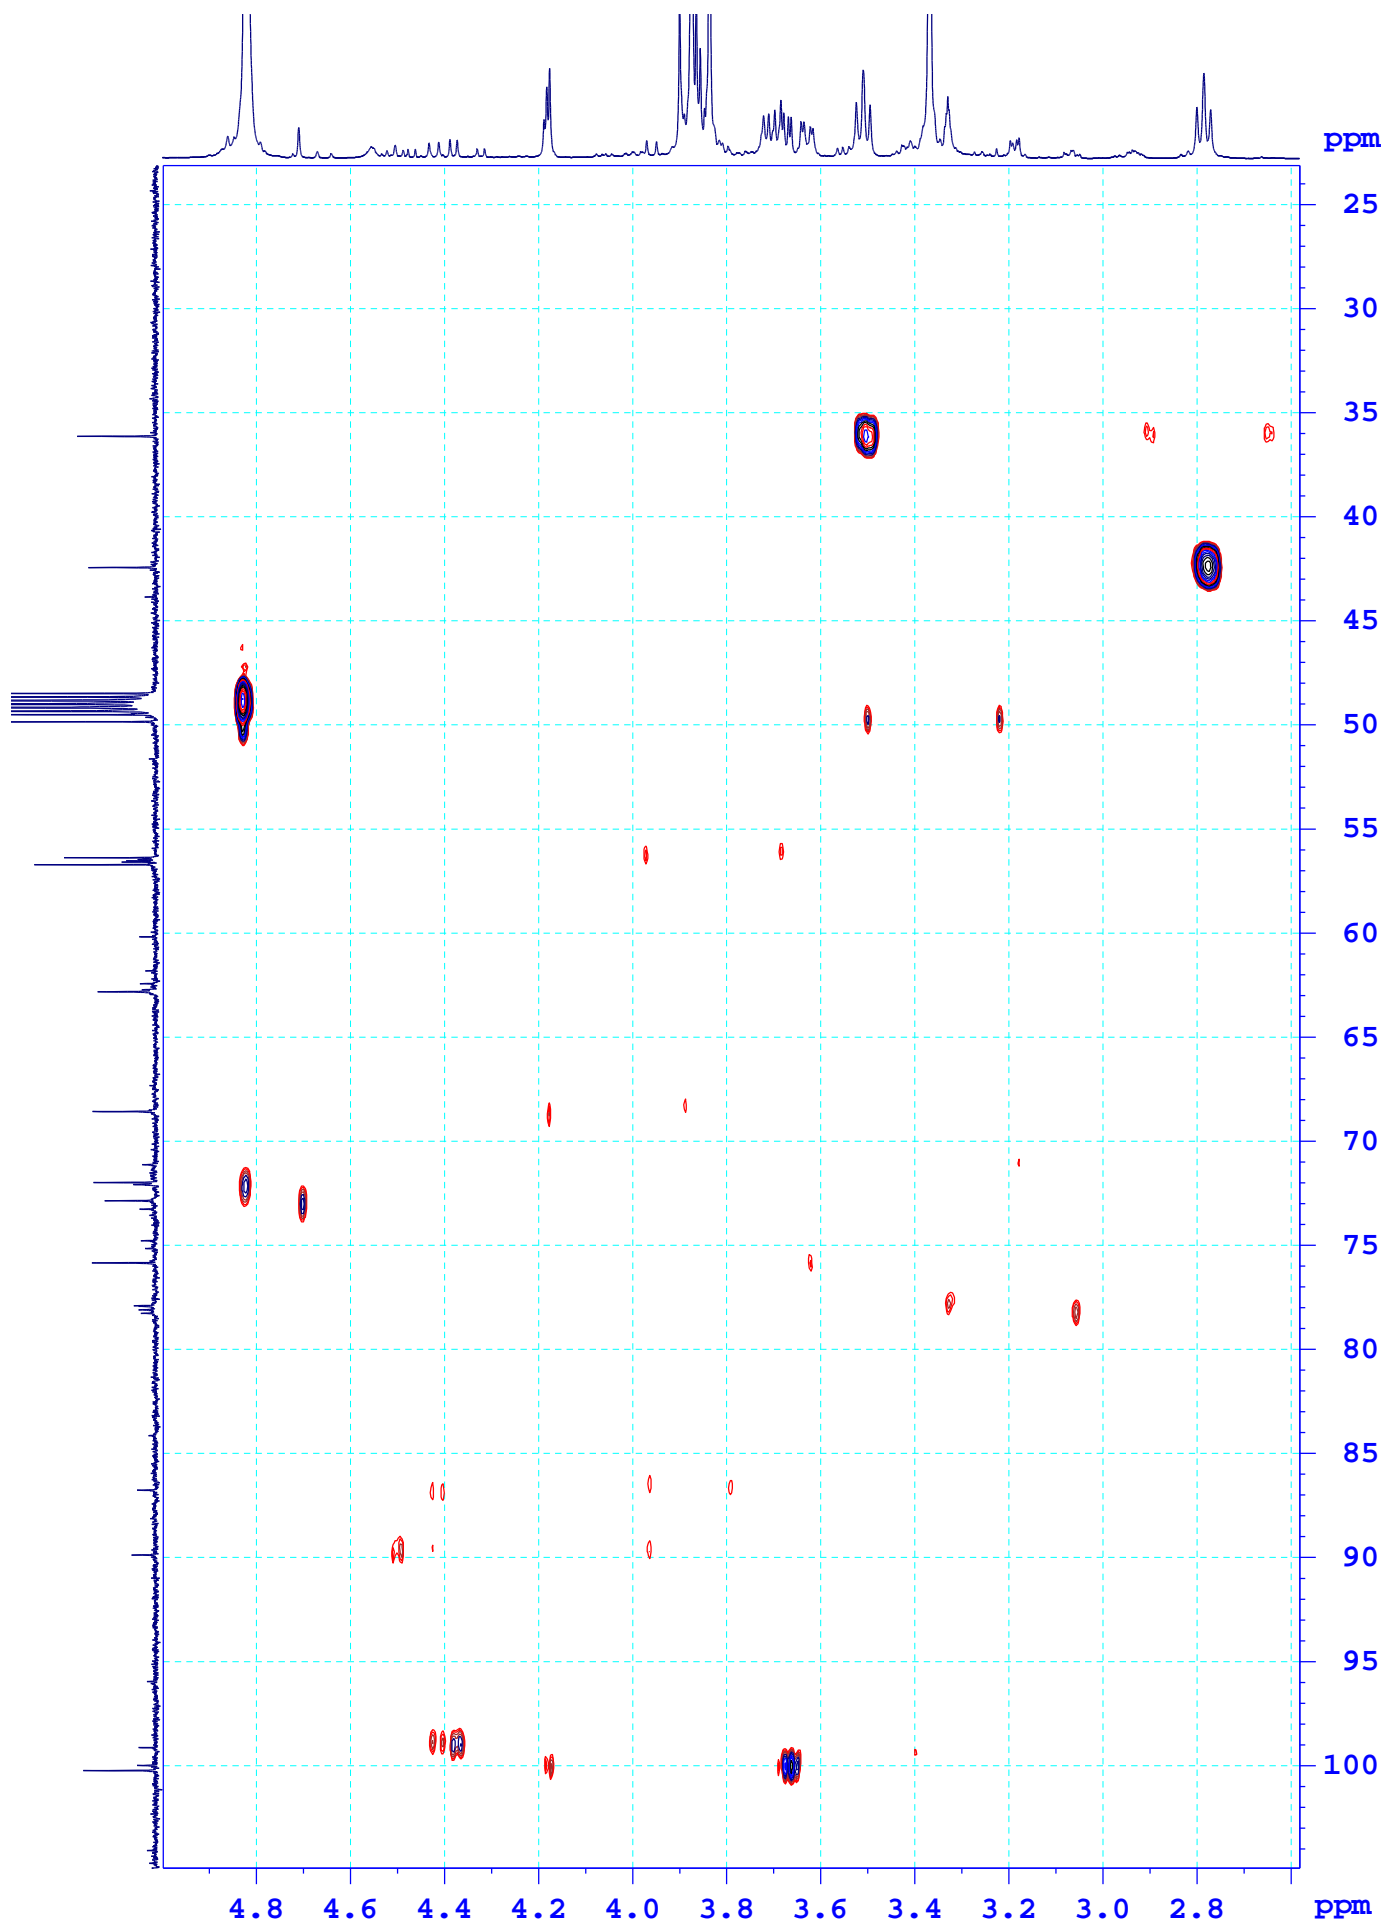

*CB3-MeOD-HMBC*

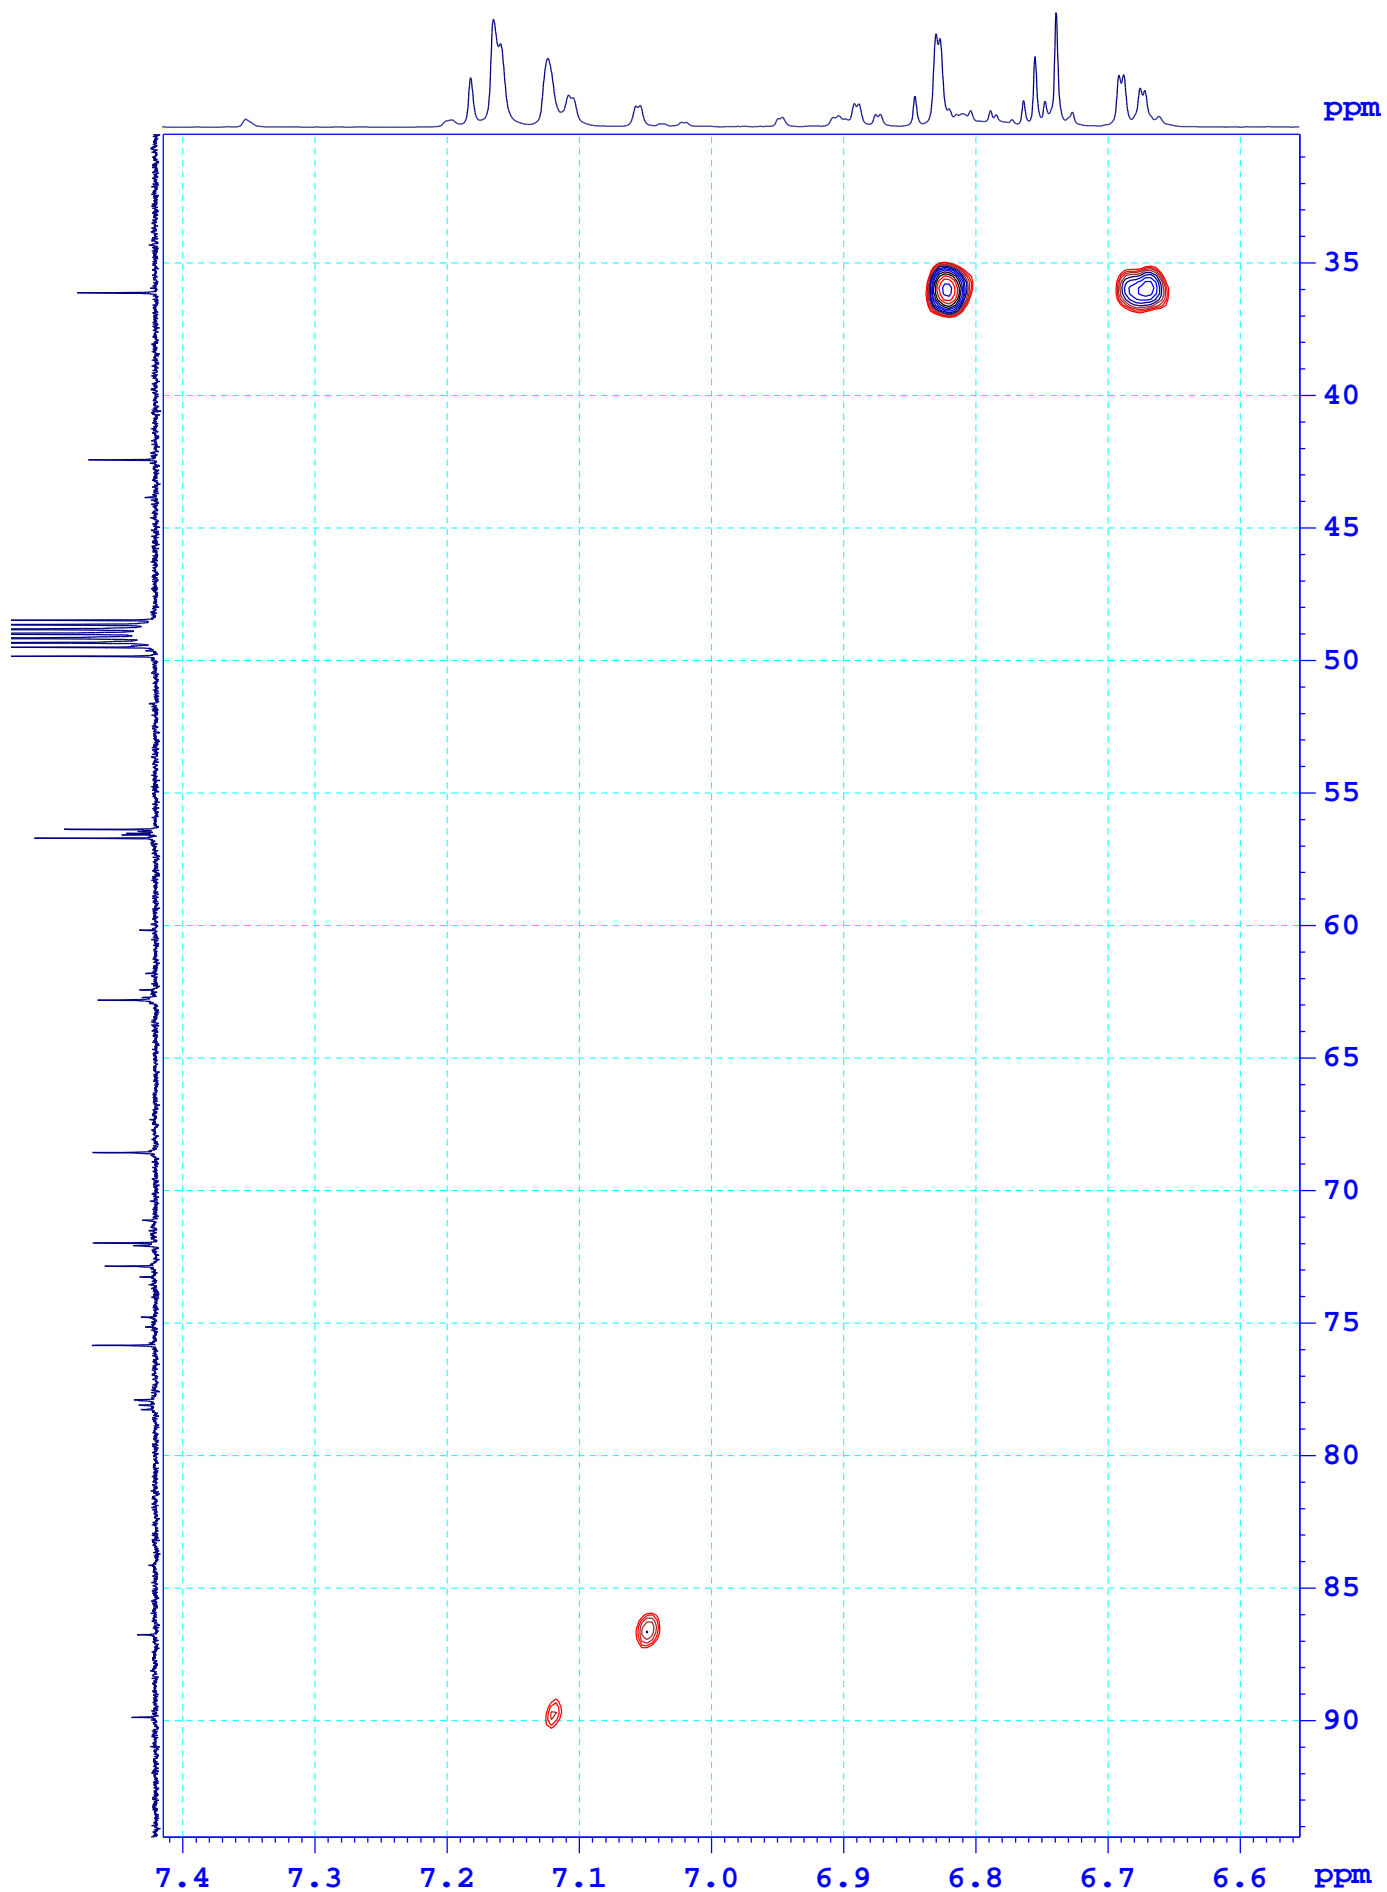

Supplement: s1 [file s1]

# CB4-MeOD-C13CPD &DEPT

DEPT90

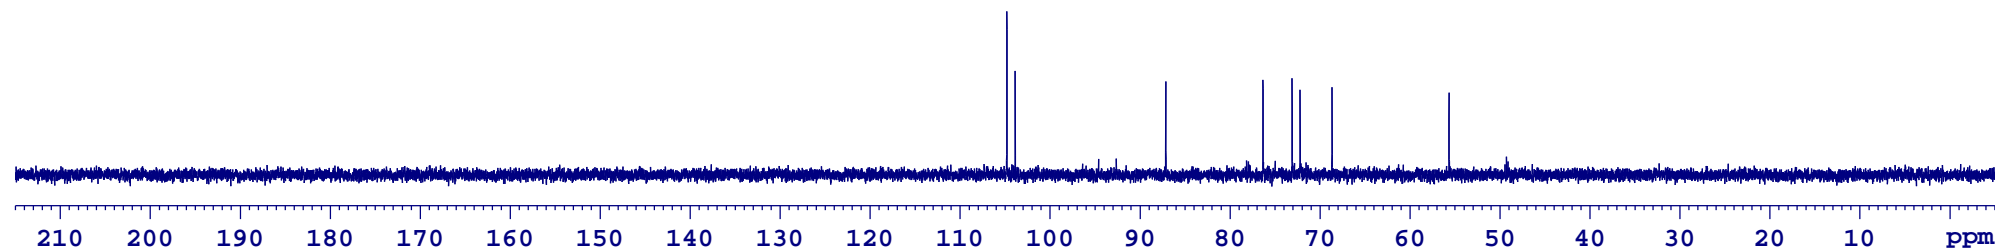

DEPT135

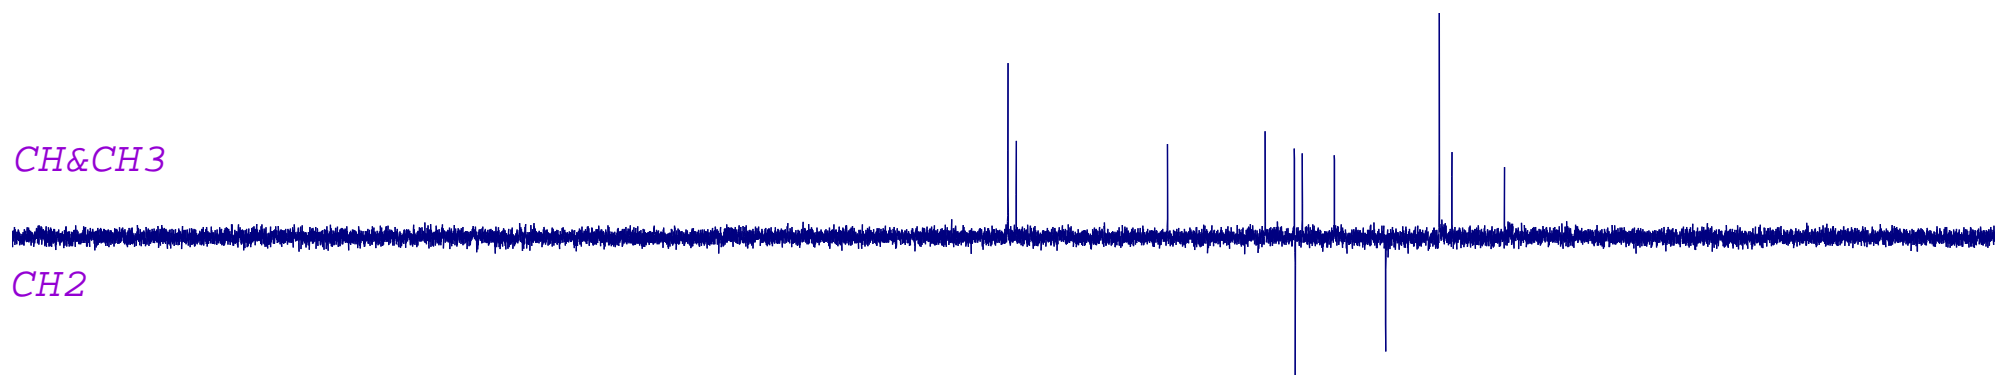

CH&CH3

CH2

C13CPD

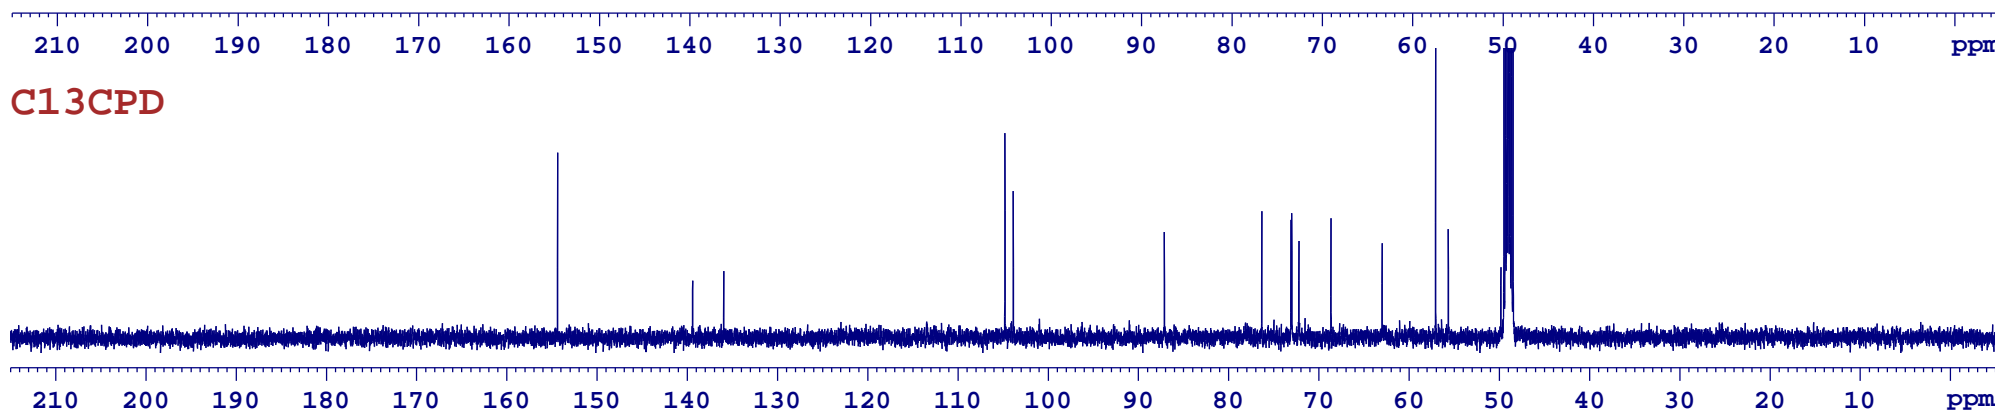

# CB4-MeOD-C13CPD &DEPT

DEPT90

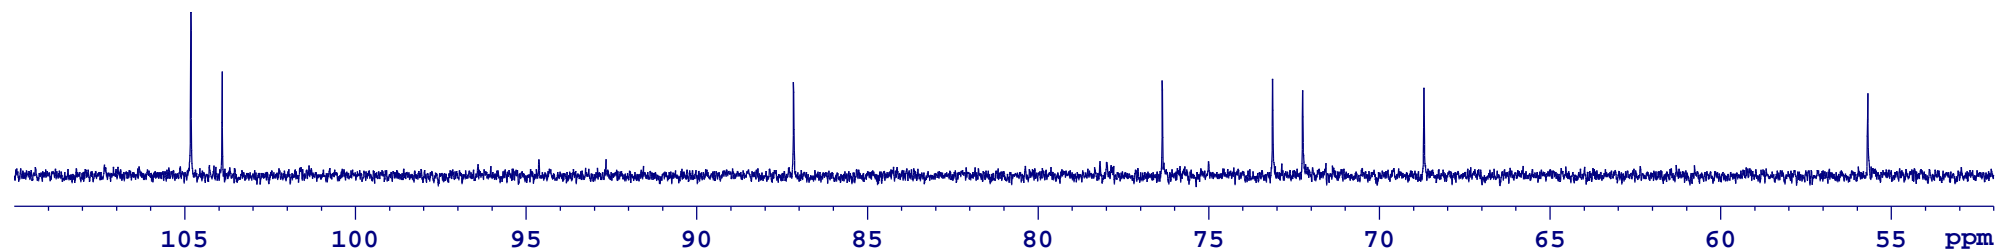

DEPT135

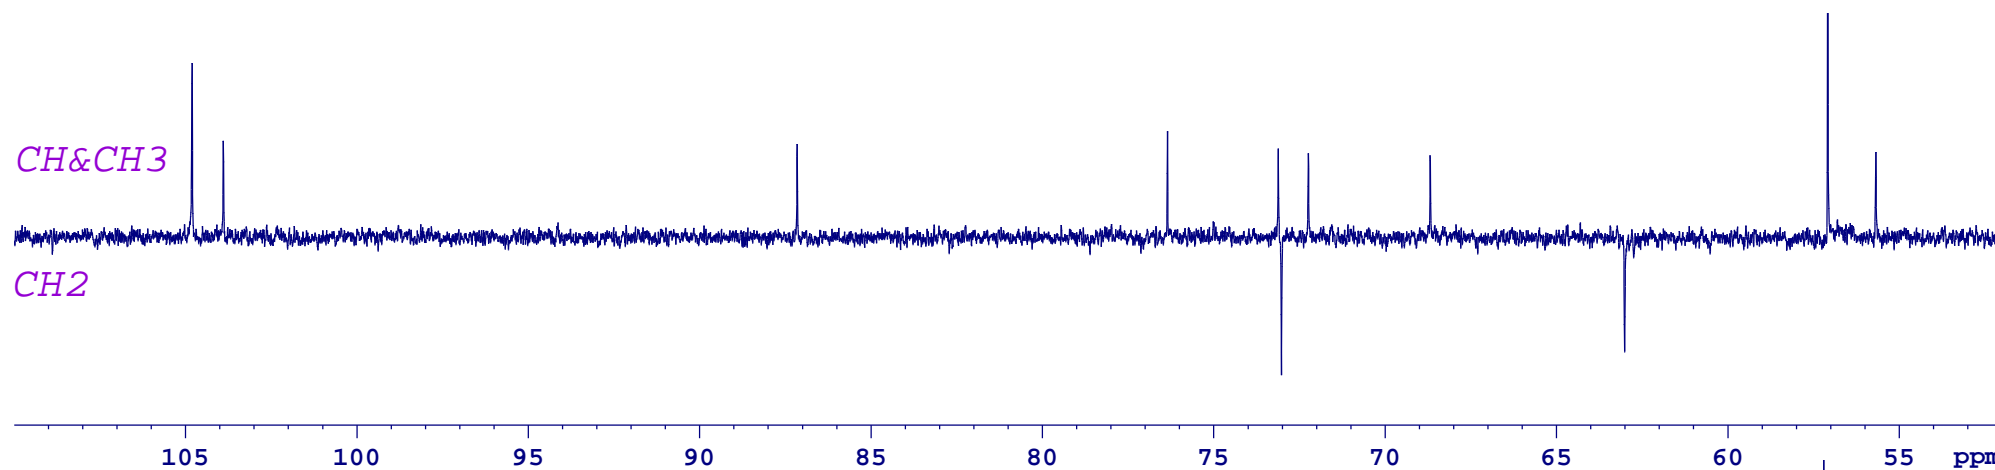

C13CPD

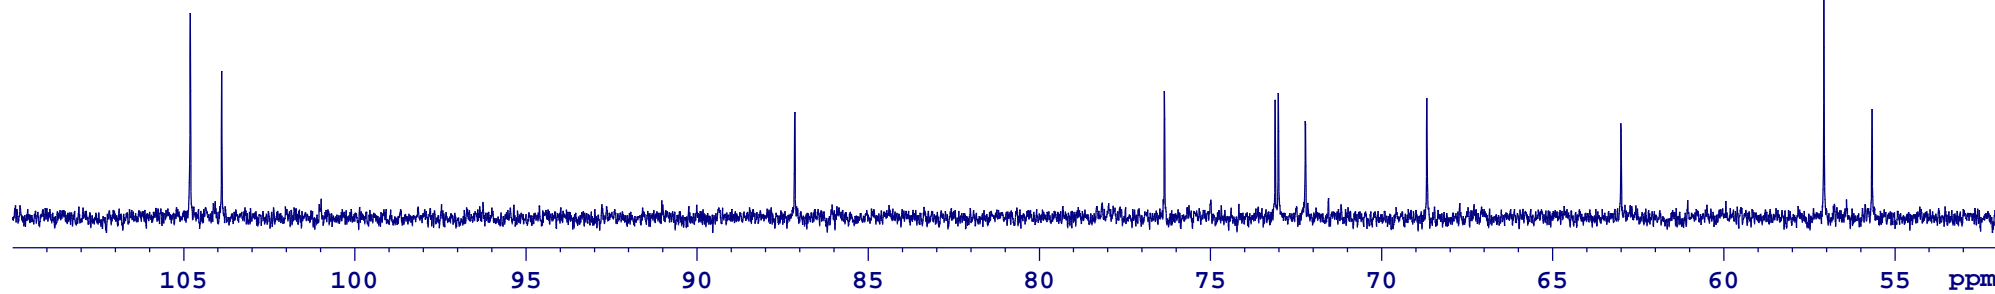

Supplement: s1 [file s1]
